# Supplementary material for: Antihypertensive drug effects according to the pretreatment self-measured home blood pressure: the HOMED-BP study
Source: PubMed Central journal article supplement — BMJ Open. 2020 Dec 12;10(12):e040524. doi: 10.1136/bmjopen-2020-040524 (PMC7735093; doi:10.1136/bmjopen-2020-040524), 2020-12-12
Supplement: bmjopen-2020-040524.draft_revisions.pdf [file bmjopen-2020-040524.draft_revisions.pdf]

# BMJ Open

BMJ Open is committed to open peer review. As part of this commitment we make the peer review history of every article we publish publicly available.

When an article is published we post the peer reviewers' comments and the authors' responses online. We also post the versions of the paper that were used during peer review. These are the versions that the peer review comments apply to.

The versions of the paper that follow are the versions that were submitted during the peer review process. They are not the versions of record or the final published versions. They should not be cited or distributed as the published version of this manuscript.

BMJ Open is an open access journal and the full, final, typeset and author-corrected version of record of the manuscript is available on our site with no access controls, subscription charges or pay-per-view fees (<http://bmjopen.bmj.com>).

If you have any questions on BMJ Open's open peer review process please email [info.bmjopen@bmj.com](mailto:info.bmjopen@bmj.com)

# BMJ Open

## Antihypertensive drug effect according to the pretreatment self-measured home blood pressure level: the HOMED-BP study

|                               |                                                                                                                                                                                                                                                                                                                                                                                                                                                                                                                                                               |
|-------------------------------|---------------------------------------------------------------------------------------------------------------------------------------------------------------------------------------------------------------------------------------------------------------------------------------------------------------------------------------------------------------------------------------------------------------------------------------------------------------------------------------------------------------------------------------------------------------|
| Journal:                      | <i>BMJ Open</i>                                                                                                                                                                                                                                                                                                                                                                                                                                                                                                                                               |
| Manuscript ID                 | bmjopen-2020-040524                                                                                                                                                                                                                                                                                                                                                                                                                                                                                                                                           |
| Article Type:                 | Original research                                                                                                                                                                                                                                                                                                                                                                                                                                                                                                                                             |
| Date Submitted by the Author: | 18-May-2020                                                                                                                                                                                                                                                                                                                                                                                                                                                                                                                                                   |
| Complete List of Authors:     | Sano, Hikari; Showa Pharmaceutical University, Social Pharmacy and Public Health<br>Hara, Azusa; Keio University, Pharmacy<br>Asayama, Kei; KU Leuven, Studies Coordinating Centre, Laboratory of Hypertension ; Teikyo University, Hygiene and Public Health<br>Miyazaki, Seiko; Showa Pharmaceutical University, Social Pharmacy and Public Health<br>Kikuya, Masahiro; Teikyo University, Hygiene and Public Health<br>Imai, Yutaka ; Tohoku Institute for Management of Blood Pressure<br>Ohkubo, Takayoshi; Teikyo University, Hygiene and Public Health |
| Keywords:                     | Hypertension < CARDIOLOGY, Cardiology < INTERNAL MEDICINE, EPIDEMIOLOGY                                                                                                                                                                                                                                                                                                                                                                                                                                                                                       |
|                               |                                                                                                                                                                                                                                                                                                                                                                                                                                                                                                                                                               |

SCHOLARONE™  
Manuscripts

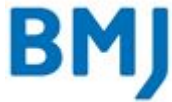

I, the Submitting Author has the right to grant and does grant on behalf of all authors of the Work (as defined in the below author licence), an exclusive licence and/or a non-exclusive licence for contributions from authors who are: i) UK Crown employees; ii) where BMJ has agreed a CC-BY licence shall apply, and/or iii) in accordance with the terms applicable for US Federal Government officers or employees acting as part of their official duties; on a worldwide, perpetual, irrevocable, royalty-free basis to BMJ Publishing Group Ltd ("BMJ") its licensees and where the relevant Journal is co-owned by BMJ to the co-owners of the Journal, to publish the Work in this journal and any other BMJ products and to exploit all rights, as set out in our [licence](#).

The Submitting Author accepts and understands that any supply made under these terms is made by BMJ to the Submitting Author unless you are acting as an employee on behalf of your employer or a postgraduate student of an affiliated institution which is paying any applicable article publishing charge ("APC") for Open Access articles. Where the Submitting Author wishes to make the Work available on an Open Access basis (and intends to pay the relevant APC), the terms of reuse of such Open Access shall be governed by a Creative Commons licence – details of these licences and which [Creative Commons](#) licence will apply to this Work are set out in our licence referred to above.

Other than as permitted in any relevant BMJ Author's Self Archiving Policies, I confirm this Work has not been accepted for publication elsewhere, is not being considered for publication elsewhere and does not duplicate material already published. I confirm all authors consent to publication of this Work and authorise the granting of this licence.

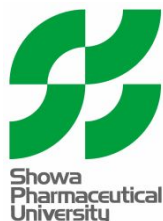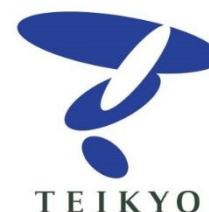

## Antihypertensive drug effect according to the pretreatment self-measured home blood pressure level: the HOMED-BP study

Short title: Wilder Law on Home Blood Pressure

Hikari Sano, Azusa Hara, Kei Asayama (0000-0003-3365-0547), Seiko Miyazaki,

Masahiro Kikuya, Yutaka Imai, Takayoshi Ohkubo,

on behalf of

Hypertension Objective Treatment Based on Measurement

by Electrical Devices of Blood Pressure (HOMED-BP) investigators

Department of Social Pharmacy and Public Health, Showa Pharmaceutical University, Machida, Japan (H.S., A.H., S.M.); Department of Pharmacy, Division of Drug Development and Regulatory Science, Keio University, Tokyo, Japan (A.H.); Department of Hygiene and Public Health, Teikyo University School of Medicine, Tokyo, Japan (K.A., M.K, T.O.); Tohoku Institute for Management of Blood Pressure, Sendai, Japan (K.A., T.O., Y.I.); KU Leuven Department of Cardiovascular Sciences, University of Leuven, Leuven, Belgium (K.A.).

Word counts: manuscript 6032, abstract 253

Tables 2, Figures 4

**Correspondence to:**

Kei Asayama, MD, PhD,  
Department of Hygiene and Public Health,  
Teikyo University School of Medicine,  
2-11-1 Kaga, Itabashi-ku,  
Tokyo 173-8605, Japan

Telephone: +81-3-3964-3615

Facsimile: +81-3-3964-1058

email: kei@asayama.org

## Abstract

**Objectives**—To clarify whether antihypertensive drug effect would be proportional to the baseline pretreatment self-measured home blood pressure (HBP) level in accordance with the law of initial value (Wilder law).

**Design**—Post-hoc analysis of a multicentre clinical trial.

**Setting**—Outpatients in nationwide Japan with mild-to-moderate essential hypertension.

**Participants**—Among 3,518 randomised participants, 2,423 who self-measured HBP during a pretreatment drug-free period, 10–28 days after starting fixed-dose antihypertensive monotherapy, and for mean 7.0 years' follow-up were eligible.

**Main outcome measures**— We analysed individual HBP readings during pretreatment and monotherapy.

**Results**—HBP during pretreatment and monotherapy kept the almost identical level within each period, regardless of the pretreatment HBP value. By the monotherapy, the reduction in the HBP increased by 2.2 mmHg (95% confidence interval [CI], 1.8–2.5) per 10-mmHg pretreatment HBP increase, up to 11.0 mmHg (CI, 9.9–12.0) among those with a HBP  $\geq$ 165 mmHg during pretreatment. Among the 1,005 patients with a low dose monotherapy (defined daily doses=0.5 units), the reduction peaked at 8.9–9.1 mmHg in the pretreatment HBP 155–164 and  $\geq$ 165 mmHg groups ( $P=0.88$ ).

**Conclusions**— Following Wilder law, the HBP reduction by the fixed-dose monotherapy was proportional to the pretreatment HBP, but without any regression to the mean phenomenon. With low-dose antihypertensive drugs, however, the HBP reduction peaked in the patients with a high pretreatment HBP, indicating the need for patients with a high HBP to receive a sufficient amount of antihypertensive drug medication at the initial treatment.

**Trial registration**—UMIN Clinical Trial Registry (<http://www.umin.ac.jp/ctr>), Unique identifier: C000000137.

1  
2  
3  
4 **Keywords:** ■ blood pressure reduction ■ antihypertensive treatment ■ home blood  
5  
6 pressure ■ self-measurement ■ Wilder law ■ regression to the mean  
7  
8  
9

## 10 **Article summary**

### 13 **Strengths and limitations of this study**

- 15 ● In the present study, we enrolled 2,423 patients with mild-to-moderate essential  
16 hypertension who measured their daily self-measurement of blood pressure at home  
17 during the pretreatment period, after antihypertensive monotherapy, and for mean  
18 7.0 years' follow-up.
- 19 ● This is the first study to demonstrate that the reduction in the home blood pressure  
20 by antihypertensive drug monotherapy was proportional to the home blood pressure  
21 during pretreatment drug-free period, in accordance with the law of initial value  
22 (Wilder law).
- 23 ● The findings also supported reports that self-measured home blood pressure was  
24 minimally affected by regression to the mean phenomenon.
- 25 ● We were unable to assess the placebo effect, which is also a major influencing factor  
26 in the administration of antihypertensive medication, because all patients received  
27 antihypertensive medication.  
28  
29  
30  
31  
32  
33  
34  
35  
36  
37  
38  
39  
40  
41  
42  
43  
44  
45  
46  
47  
48  
49  
50  
51  
52  
53  
54  
55  
56  
57  
58  
59  
60

1  
2  
3  
4  
5  
6  
7  
8  
9  
10  
11  
12  
13  
14  
15  
16  
17  
18  
19  
20  
21  
22  
23  
24  
25  
26  
27  
28  
29  
30  
31  
32  
33  
34  
35  
36  
37  
38  
39  
40  
41  
42  
43  
44  
45  
46  
47  
48  
49  
50  
51  
52  
53  
54  
55  
56  
57  
58  
59  
60

For peer review only

## Introduction

Hypertension is a foremost risk factor for cardiovascular disease.<sup>1 2</sup> A meta-analysis showed that a 10/5 mmHg reduction in conventional office systolic/diastolic blood pressure reduces the stroke risk by  $\approx 40\%$  and the coronary artery disease risk by  $\approx 20\%$ .<sup>3</sup> However, office blood pressure has major limitations including being affected by the white-coat effect, i.e. a warning response wherein the office blood pressure unexpectedly rises in an examination room in front of medical staff.<sup>4</sup> In contrast, self-measured home blood pressure assessed using automated devices in a non-medical setting can obtain a plurality of readings over a long period under relatively uniform conditions, resulting in highly reproducible values without observer bias when patients apply a standardised protocol.<sup>2 4 5</sup> Home monitoring is free from white-coat effect, and is suitable for the evaluation of drug efficacy.<sup>2 5 6</sup> Given its greater prognostic ability for cardiovascular complications than office blood pressure,<sup>1 2 7-9</sup> home blood pressure-based antihypertensive treatment is highly recommended.<sup>2 9</sup>

Recent studies<sup>10 11</sup> reported that the higher the pretreatment blood pressure, the greater the reduction in the blood pressure by antihypertensive drug treatment, according to the law of initial value (Wilder law<sup>12</sup>). However, the reduction in the 24-h ambulatory blood pressure corresponding to the pretreatment office blood pressure was relatively small.<sup>10</sup> Such disproportionality can be attributed to changes in the white-coat effect, which depends on pretreatment office blood pressure.<sup>10</sup> Although ambulatory and home blood pressures are both categorised as out-of-office blood pressure, the characteristics and usefulness of home blood pressure differ from those of ambulatory recordings,<sup>1 2 9</sup> and no report has described the difference in the antihypertensive drug effect according to the pretreatment blood pressure level.

We therefore investigated the association between the pretreatment home and office blood pressures levels and home blood pressure reduction by antihypertensive



1  
2  
3  
4 monotherapy as well as long-term blood pressure changes in patients participating in a  
5  
6 home blood pressure-based clinical trial.  
7  
8  
9

## 10 **Methods**

### 11 **Study design**

12  
13 This is a post-hoc analysis of the Hypertension Objective Treatment based on  
14  
15 Measurement by Electrical Device of Blood Pressure (HOMED-BP) study<sup>13-15</sup> which was  
16  
17 a multicentre clinical trial with a prospective, randomised, open-label, blinded end point,  
18  
19 evaluation (PROBE)<sup>16</sup> design. The HOMED-BP protocol complies with the Declaration of  
20  
21 Helsinki for the investigation of human subjects and is registered with the UMIN Clinical  
22  
23 Trial Registry, number C000000137 (<http://www.umin.ac.jp/ctr>). The institutional review  
24  
25 board of the Teikyo University School of Medicine approved the study (17-044-2), and all  
26  
27 study participants gave their written informed consent.  
28  
29  
30

31  
32 We included patients with mild-to-moderate essential hypertension based on home  
33  
34 blood pressure (135–179/85–119 mmHg) with a minimum age of 40 years old. The  
35  
36 exclusion criteria were patients with severe hypertension (home blood pressure  
37  
38  $\geq 180/\geq 120$  mmHg or office blood pressure  $\geq 220/\geq 125$  mmHg), met the systolic criteria for  
39  
40 the home blood pressure ( $\geq 135$  mmHg) but diastolic home blood pressure was  $< 65$   
41  
42 mmHg, met the diastolic home blood pressure criteria ( $\geq 85$  mmHg) but systolic home  
43  
44 blood pressure was  $< 110$  mmHg, or those with contraindications to either calcium  
45  
46 channel blockers, angiotensin converting enzyme inhibitors, or angiotensin receptor  
47  
48 blockers.  
49

### 50 **Selection of patients**

51  
52 After the 1<sup>st</sup> visit on initial registration, the 5,211 enrolled patients were followed-up for at  
53  
54 least two weeks without any antihypertensive drugs. At the 2<sup>nd</sup> visit, 3,518 (67.5%)  
55  
56 eligible patients were randomised in a 2 × 3 design, to monotherapy with the first-line  
57  
58 drug (calcium channel blockers, angiotensin-converting enzyme inhibitors, or angiotensin  
59  
60

1  
2  
3  
4 receptor blockers) and target home blood pressure-based antihypertensive levels (usual  
5 control, ranging from 125 to 134 mmHg systolic and 80 to 84 mmHg diastolic; tight  
6 control, <125 mmHg systolic and <80 mmHg diastolic). Reasons for excluding the other  
7  
8  
9  
10 1,693 patients before the randomisation were described elsewhere<sup>14</sup> and listed in  
11  
12 Supplemental Figure 1.

13  
14  
15 In the present analysis, we excluded 1,095 of the randomised 3,518 patients because  
16 they had obtained <3 home readings at baseline (pretreatment period;  $n=102$ ) or during  
17 fixed-dose monotherapy with the first-line drug ( $n=592$ ), they had isolated diastolic  
18 hypertension (home blood pressure  $\leq 135/\geq 85$  mmHg;  $n=143$ ), they did not actually  
19 receive an antihypertensive drug or had been treated with  $\geq 2$  drug classes simultaneously  
20 ( $n=37$ ), or we were unable to assess the blood pressure or treatment status during follow-  
21 up ( $n=221$ ). A total of 2,423 participants were analysed statistically (Supplemental Figure  
22 1). Based on our previous report indicating that the risks of cardiovascular outcomes  
23 were similar in the randomised groups (tight versus usual blood pressure control, and a  
24 comparison of drug classes to initiate treatment) because of the small blood pressure  
25 difference between the groups,<sup>14</sup> we combined all 2,423 participants in the present  
26  
27  
28  
29  
30  
31  
32  
33  
34  
35  
36  
37  
38  
39  
40  
41  
42  
43  
44  
45  
46  
47  
48  
49  
50  
51  
52  
53  
54  
55  
56  
57  
58  
59  
60  
analysis.

#### Measurements of blood pressure

41  
42 Patients enrolled in HOMED-BP received spoken and written instructions on blood  
43 pressure self-measurement and the utilisation of a validated cuff-oscillometric OMRON  
44 HEM 7471C-N (Omron Healthcare Co., Ltd., Kyoto, Japan),<sup>17</sup> in which all measured data,  
45 including the measurement time, are automatically recorded. The standard upper-arm  
46 cuff which covered 22–32 cm of patients' arm circumference was attached to the device.  
47  
48  
49  
50  
51  
52  
53  
54  
55  
56  
57  
58  
59  
60  
The importance of using appropriate sized cuff was noted in the user's manual of the  
device, and we provided another cuff according to the request. Throughout the study  
period, patients were asked to self-measure their blood pressure at home once every

1  
2  
3  
4 morning within one hour of awakening, after urination, before breakfast, before taking  
5 antihypertensive medication, and after two minutes' rest in a sitting position.  
6  
7

8 Office blood pressure was measured by doctors in the outpatient clinic using a  
9 validated cuff-oscillometric OMRON HEM-907 (Omron Healthcare Co., Ltd., Kyoto,  
10 Japan).<sup>18</sup> At each visit, the office blood pressure was measured twice consecutively in a  
11 sitting position after at least two minutes' rest.  
12  
13  
14  
15

### 16 **The evaluation of the blood pressure**

17  
18 In this study, the baseline pretreatment home blood pressure was the average of the  
19 preceding blood pressure for five days before the 2<sup>nd</sup> visit on randomisation, and the  
20 blood pressure during the monotherapy was the average that for five days within 10–28  
21 days after the initiation of the randomised first-line drugs (Figure 1).<sup>19</sup> We used this time  
22 window for home readings because (1) the home blood pressure used for determining  
23 eligibility and treatment adjustments at every visit in the HOMED-BP study was the  
24 average of the home readings available over 5 days immediately preceding the visit,<sup>14</sup> (2)  
25 the clinical investigators followed the patients at intervals of approximately 2 to 4 weeks in  
26 general practice and approximately 4 to 8 weeks at hospital outpatient clinics, and (3) the  
27 time interval needed to receive sufficient antihypertensive effects is reported to be  
28 approximately 7 to 23 days.<sup>20</sup> All these home blood pressure values evaluated in the  
29 present study were therefore captured before the 3<sup>rd</sup> visit when the drug titration might be  
30 performed. The home blood pressure at the end of follow-up (mean follow-up period, 7.0  
31 years; interquartile range, 5.1–9.1 years) was defined as the average of the last available  
32 five days of home blood pressure values. The office blood pressure during pretreatment  
33 and follow-up were the averages of the two consecutive measurements at each visit. The  
34 reduction in the blood pressure was calculated as the change from the pretreatment  
35 blood pressure at baseline.  
36  
37  
38  
39  
40  
41  
42  
43  
44  
45  
46  
47  
48  
49  
50  
51  
52  
53  
54  
55  
56  
57  
58  
59  
60

## Definition of comorbidity and quantification of drugs

The body mass index was calculated as the body weight in kilograms divided by the height in meters squared. Diabetes mellitus was defined as a fasting plasma glucose level of  $\geq 7.0$  mmol/L ( $\geq 126$  mg/dL), HbA1c of  $\geq 6.5\%$ , or treatment with oral antidiabetic drugs or insulin. Hypercholesterolemia was defined as a total serum cholesterol level of  $\geq 5.69$  mmol/L ( $\geq 220$  mg/dL), a history of hypercholesterolemia, or taking lipid-lowering drugs.<sup>14 19</sup>

We used the World Health Organization's defined daily doses (DDD) to quantify the use of antihypertensive drugs<sup>21</sup>; DDD is the standard maintenance dose per day for a drug used for its main indication in adults.<sup>21</sup> The standard usage per day is defined as a DDD of 1 unit.

## Statistical analyses

For database management and statistical analyses, we used the SAS software, version 9.4 (SAS Institute Inc., Cary, NC, USA). Statistical significance was set at  $\alpha < 0.05$  on two-sided tests. We focused on our analyses based on systolic blood pressure, as systolic pressure is the overriding risk factor in middle-aged and older people.<sup>22</sup>

Patients were divided into four groups ( $\leq 145$ , 145–154, 155–164, and  $\geq 165$  mmHg) according to the baseline pretreatment systolic home blood pressure, and the blood pressure reduction was compared among the groups. For office blood pressure assessments, patients were stratified into 10 mmHg groups according to the pretreatment systolic office blood pressure as in the report by Schmieder et al.<sup>10</sup> The chi-square test and analysis of variance (ANOVA) were used to compare the baseline characteristics between groups appropriately. Home blood pressures during the five pretreatment days as well as those during the five monotherapy days were compared by a repeated measure mixed linear model while taking missing values into account. A covariance analysis (ANCOVA) was used to compare each blood pressure reduction group, and the change in the blood pressure reduction accompanying the increase in the pretreatment

1  
2  
3  
4 blood pressure was evaluated using a multiple regression model, both adjusted for sex,  
5  
6 age, body mass index, current smoking and drinking, hypercholesterolemia, diabetes  
7  
8 mellitus, and history of cardiovascular disease. The DDD during the initial  
9  
10 antihypertensive monotherapy and at the end of follow-up were further used as the  
11  
12 adjustment factor to compare the pressure reduction from pretreatment to the initial  
13  
14 treatment and to the end of follow-up, respectively. For 40 patients without body mass  
15  
16 index data, we interpolated the value based on the sex and age (continuous). The white-  
17  
18 coat effect was defined as the office blood pressure minus the home blood pressure as a  
19  
20 continuous variable (it can be negative value if home blood pressure was higher than  
21  
22 office blood pressure), and changes in the white-coat effect were determined by  
23  
24 subtracting the effect observed at the end of follow-up period from the effect captured  
25  
26 during pretreatment.  
27  
28

### 29 **Patient and public involvement**

31 No patients were involved in setting the research question or the outcome measures, nor  
32  
33 were they involved in developing plans for recruitment, design, or implementation of the  
34  
35 study. No patients were asked to advise on interpretation or writing up of results. There  
36  
37 are no specific plans to disseminate the results of the research to study participants or  
38  
39 the relevant patient community beyond the usual channels of publication.  
40  
41  
42  
43

## 44 **Results**

### 45 **Patients' characteristics**

46  
47 Table 1 shows the baseline characteristics of 2,423 patients. The average age of all  
48  
49 participants was 60.0 (standard deviation, 9.8) years, and the proportion of women was  
50  
51 51.0%. Age, body mass index, and office blood pressure were significantly and positively  
52  
53 associated with baseline systolic blood pressure category. As shown in Table 2, the daily  
54  
55 home blood pressures during pretreatment and during monotherapy were almost identical  
56  
57 within each period ( $P \geq 0.41$ ) except for in patients with a home blood pressure  $< 145$   
58  
59  
60

1  
2  
3  
4 mmHg at pretreatment days ( $P=0.032$ ) and 145–154 mmHg during monotherapy period  
5  
6 ( $P=0.035$ ); even among those patients, the differences between adjacent days were not  
7  
8 significant ( $P\geq 0.12$ ). Relationship of the white-coat effect and office or home blood  
9  
10 pressure levels during pretreatment period as a cross-sectional approach are shown in  
11  
12 Supplemental Figure 2. The white-coat effect increased as the office blood pressure  
13  
14 increase (7.5 mmHg [95% confidence limits, 7.3–7.8 mmHg] per 10-mmHg increment);  
15  
16 whereas, the home blood pressure level was negatively related to the white-coat effect (-  
17  
18 4.5 mmHg [95% confidence limits, -3.9 to -5.0 mmHg] per 10-mmHg home blood  
19  
20 pressure increment).  
21  
22

### 23 **Reduction in the home blood pressure by monotherapy according to the** 24 **pretreatment blood pressure**

25  
26  
27 During the initial fixed-dose monotherapy, the reduction in the systolic home blood  
28  
29 pressure enhanced by 2.2 mmHg (95% confidence interval [CI], 1.8–2.5 mmHg) per 10-  
30  
31 mmHg pretreatment home blood pressure increase. The reductions in each baseline  
32  
33 pretreatment blood pressure group are shown in Figure 2. The slope of the home blood  
34  
35 pressure reduction accompanying the increase in the pretreatment office blood pressure  
36  
37 was shallower, and it increased by 0.6 mmHg (95% CI, 0.4–0.9 mmHg) per 10-mmHg  
38  
39 pretreatment office blood pressure increase.  
40  
41

### 42 **Stratification by DDD**

43  
44 Figure 3 demonstrates the results according to the DDD of the initial antihypertensive  
45  
46 drugs. Among 1,005 patients who started monotherapy with antihypertensive drugs of 1  
47  
48 unit DDD, the pretreatment home blood pressure was linearly associated with the blood  
49  
50 pressure reduction at the time of monotherapy; the enhancement of the home blood  
51  
52 pressure reduction for each increase in the pretreatment home blood pressure category  
53  
54 was 2.6 mmHg (95% CI, 1.9–3.2 mmHg). However, among those receiving 0.5 units  
55  
56 DDD ( $n=1,005$ ; occasionally the same number), significant enhancement in home blood  
57  
58 pressure reductions was observed up to the 155–164 mmHg group (per 1 group increase,  
59  
60

1  
2  
3  
4 2.1 mmHg; 95% CI, 1.2–2.9 mmHg), where it peaked; the reductions in the home blood  
5  
6 pressure among patients with a pretreatment home blood pressure between 155–164  
7  
8 mmHg and that of  $\geq 165$  mmHg were 8.9 and 9.1 mmHg, respectively ( $P=0.88$ ). The  
9  
10 results were confirmed when we divided whole 2,423 patients according to DDD  $<1$  or  $\geq 1$   
11  
12 unit, as shown in Supplemental Figure 3.

### 13 14 15 **Reduction in the follow-up blood pressure according to the pretreatment blood** 16 17 **pressure**

18  
19 According to the previous report based on ambulatory blood pressure monitoring,<sup>10</sup> we  
20  
21 compared the home and office blood pressure reductions at the end of follow-up  
22  
23 according to the baseline pretreatment office blood pressure. After the 7.0 years' follow-  
24  
25 up with a mean DDD of 1.8 units (median 1.5; interquartile range, 1.0–2.5), the reduction  
26  
27 in the office blood pressure was linearly associated with the office blood pressure during  
28  
29 pretreatment (reduction in the home pressure from the office blood pressure category  
30  
31  $<140$  to  $\geq 180$  mmHg: 7.5 to 50.7 mmHg; Figure 4). Furthermore, similar to the previous  
32  
33 report based on ambulatory monitoring<sup>10</sup>, an association between the pretreatment office  
34  
35 blood pressure and the home blood pressure reduction was weakly observed (reduction  
36  
37 in the home pressure: 18.6 to 30.7 mmHg). Finally, changes in the white-coat effect  
38  
39 during the follow-up period significantly increased as the pretreatment office blood  
40  
41 pressure increased (Supplemental Figure 4; category increment  $P<0.0001$ ).

### 42 43 44 45 46 **Discussion**

47  
48 The antihypertensive drug effect depends on the pretreatment blood pressure. In line  
49  
50 with Wilder law,<sup>12</sup> the home blood pressure reduction after the initial drug treatment was  
51  
52 proportional to the baseline pretreatment home blood pressure in the present study. The  
53  
54 current findings emphasize the need to assess the home blood pressure before treatment  
55  
56 when evaluating and initiating antihypertensive drug therapy.  
57  
58  
59  
60

1  
2  
3  
4 Wilder indicated that the direction of the body function response depends to a large  
5 extent on the initial level of that function, regardless of the agent.<sup>12</sup> Wilder law predicts  
6 that in the most severe hypertensive patients, the decrease in blood pressure will be  
7 greater with the same medication than in those with less-severe hypertension. The  
8 statistical phenomenon of regression to the mean (regression toward the mean) is  
9 another major confounding factor hampering the accurate assessment of the effect of  
10 antihypertensive agents.<sup>23</sup> However, as shown in Table 2, there were no regression  
11 trends in the home blood pressure values from the first to the final measurement during  
12 the pretreatment or monotherapy periods, regardless of the pretreatment home blood  
13 pressure level. This finding indicates the strength of the self-measurement of home blood  
14 pressure, as home measurement is associated with minimal (if any during an initial few  
15 days after the measurement begins<sup>24</sup>) regression to the mean.<sup>5 6 25</sup> It is therefore likely  
16 that home blood pressure measurement is useful for estimating the efficacy of  
17 antihypertensive drugs.  
18  
19  
20  
21  
22  
23  
24  
25  
26  
27  
28  
29  
30  
31  
32

33 Schmieder et al<sup>10</sup> reported that the higher the baseline office blood pressure, the  
34 greater the blood pressure reduction after 1 year of the treatment enhancement, and this  
35 was more obvious in the office blood pressure than in the ambulatory blood pressure.<sup>10</sup> A  
36 recent meta-analysis also demonstrated that overall treatment-induced reduction was  
37 greater for office blood pressure than for 24-h ambulatory blood pressure.<sup>11</sup> In the  
38 present study, the reduction in the office blood pressure at the end of follow-up, after a  
39 mean 7.0 years was also greater than that in the self-measured home blood pressure  
40 (Figure 4). Schmieder et al<sup>10</sup> attributed this discrepancy to the changes in the white-coat  
41 effect, i.e. the higher the baseline office blood pressure, the greater the decrease in the  
42 white-coat effect due to antihypertensive treatment. This assumption was also supported  
43 by the findings of the present study (Supplemental Figure 4); however, the white-coat  
44 effect may not be a main driver for the discrepancy because the home blood pressure  
45 reduction also followed Wilder law despite the negative correlation between home blood  
46  
47  
48  
49  
50  
51  
52  
53  
54  
55  
56  
57  
58  
59  
60



1  
2  
3  
4 pressure level and white-coat effect during the pretreatment period. Nevertheless, the  
5  
6 out-of-office blood pressure is theoretically free from the white-coat effect,<sup>4</sup> and the  
7  
8 reduction in the office blood pressure by antihypertensive treatment partially includes a  
9  
10 reduction in the white-coat effect as well. We should therefore follow-up out-of-office-  
11  
12 measured blood pressure carefully, since patients with a higher blood pressure tend to  
13  
14 show a greater antihypertensive effect when their values are based on office-based  
15  
16 measurements, while their out-of-office blood pressure reduction might be insufficient,  
17  
18 resulting in a persistent high risk for cardiovascular complications.  
19

20  
21 Among 1,005 patients who were taking low-dose antihypertensive drugs, namely at a  
22  
23 dose of DDD 0.5 units or lower, home blood pressure reduction during the monotherapy  
24  
25 in the group with a pretreatment home blood pressure of  $\geq 165$  mmHg was almost  
26  
27 identical to the reduction in the group with a pretreatment home blood pressure of 155–  
28  
29 164 mmHg. A high home blood pressure is associated with a high cardiovascular  
30  
31 disease risk over the long term, both before and during antihypertensive therapy.<sup>14 15</sup>  
32  
33 Inadequate control of office blood pressure with antihypertensive drug therapy remains a  
34  
35 critical issue in Japan<sup>26</sup> as well as in Europe<sup>27</sup> and the United States.<sup>28</sup> Previous  
36  
37 studies<sup>29 30</sup> have shown the importance of rapid blood pressure control, and the current  
38  
39 findings suggest that a sufficient dosage of antihypertensive drug from the beginning of  
40  
41 treatment is necessary, particularly among those with a high home blood pressure before  
42  
43 starting treatment.  
44

45  
46 Although the need to strengthen antihypertensive drug treatment has been gradually  
47  
48 accepted,<sup>1 2 9</sup> various factors associate with medical providers, patients, and healthcare  
49  
50 systems have contributed to clinical inertia (non-compliant).<sup>31 32</sup> Clinical inertia is  
51  
52 associated with inadequate blood pressure control, resulting in the increased risk of  
53  
54 adverse cardiovascular effects. Medical services should help overcome clinical inertia as  
55  
56 well as other hindrances in order to improve the blood pressure control of patients. Self-  
57  
58 measurement of home blood pressure would ameliorate the status quo because it leads  
59  
60

1  
2  
3  
4 an improved awareness among patients with high blood pressure, helping them adhere to  
5 antihypertensive lifestyle modification and drug treatment.<sup>5</sup>  
6  
7

8 Our current study must be interpreted within the context of several potential limitations.  
9  
10 First, because the patients in HOMED-BP received home blood pressure-guided  
11 therapy,<sup>14</sup> their treatment was adjusted according to the self-measured home blood  
12 pressure, and the office blood pressure was used as complimentary information. Second,  
13 we excluded 1,095 (31.1%) from the randomised HOMED-BP patients in which their  
14 status could affect the findings of the antihypertensive drug effect. Third, we were unable  
15 to assess the placebo effect in the present study because all patients received  
16 antihypertensive medication. The placebo effect is a major influencing factor, in addition  
17 to Wilder law and the regression to the mean phenomenon, in the administration of  
18 antihypertensive medication.<sup>23</sup> Fourth, because we do not have readings of office blood  
19 pressure 3 or more at each visit, the regression to the mean on office blood pressure  
20 cannot be assessed nor compared with that on home blood pressure. Finally, although  
21 our results are representative of middle- to old-aged Japanese patients, they might not be  
22 applicable to other settings or ethnic groups with different distributions of risk factors.  
23  
24  
25  
26  
27  
28  
29  
30  
31  
32  
33  
34  
35  
36  
37

38 In conclusion, the reduction in the home blood pressure by antihypertensive drug  
39 monotherapy was proportional to the home blood pressure during pretreatment drug-free  
40 period, in accordance with Wilder law.<sup>12</sup> However, the home blood pressure reduction  
41 peaked in the patients with a high pretreatment home blood pressure,  $\geq 155$  mmHg, when  
42 their treatment were initiated with low-dose antihypertensive drugs. Patients with more  
43 than this home blood pressure threshold might be categorized as resistant hypertension  
44 because Wilder law was no longer applied under the insufficient therapy, although we  
45 cannot say too much based on this findings derived from the HOMED-BP patients with  
46 mild-to-moderate hypertension. Whether Wilder law can be similarly applicable to high  
47 risk patients with severe hypertension remains to be proved. Meantime, home blood  
48 pressure measurement was minimally affected by regression to the mean, suggesting the  
49  
50  
51  
52  
53  
54  
55  
56  
57  
58  
59  
60

1  
2  
3  
4 usefulness of home blood pressure measurement for estimating the efficacy of  
5  
6 antihypertensive drugs. Patients with a high home blood pressure during pretreatment  
7  
8 should receive a sufficient amount of antihypertensive medication from the initial  
9  
10 treatment.  
11  
12  
13

### 14 **Acknowledgements**

15  
16 We would like to express our deepest appreciation to all of the HOMED-BP study  
17  
18 collaborators for their valuable contribution. We thank the staff of Teikyo University for  
19  
20 their valuable help.  
21  
22

### 23 **Contributors**

24  
25 KA, YI, and TO conceived and designed the study, AH, KA, MK, and YI acquired the data,  
26  
27 and KA and HS carried out statistical analysis. HS drafted the original manuscript with  
28  
29 KA and AH. SM, YI, and TO provided intellectual input, and all authors critically revised  
30  
31 the manuscript and approved the final manuscript. KA is the guarantor.  
32  
33

### 34 **Funding**

35  
36 This study was funded by grants from the Japan Cardiovascular Research Foundation,  
37  
38 the Japan Arteriosclerosis Prevention Fund, and Tohoku University. Fujitsu Systems  
39  
40 East Limited (Tokyo, Japan) and Omron Healthcare Co., Ltd. (Kyoto, Japan) developed  
41  
42 and maintained the Internet-based infrastructure for the measurement of the blood  
43  
44 pressure at home and the management of patients. This study was also supported by  
45  
46 Grants-in-Aid for Scientific Research (23390171, 25253059, 26860093, 16K15359,  
47  
48 17H04126, and 18K06759) from the Ministry of Education, Culture, Sports, Science and  
49  
50 Technology, Japan, and Grants-in-Aid for the Japanese Society for the Promotion of  
51  
52 Science (JSPS) fellows (25.7756 and 25.9328). All funding agencies had no role in the  
53  
54 design and conduct of the study; in the collection, analysis, and interpretation of the data;  
55  
56 or in the preparation, review, or approval of the manuscript.  
57  
58  
59  
60

**Competing interests**

All authors have completed the ICMJE uniform disclosure form at [www.icmje.org/coi\\_disclosure.pdf](http://www.icmje.org/coi_disclosure.pdf) and declare: no support from any organisation for the submitted work; KA, YI, and TO has received research grants from Omron Healthcare. No other relationships or activities that could appear to have influenced the submitted work.

**Ethical approval**

Fully disclosed in the Study design section.

**Data sharing**

No additional data are available.

**Statements**

The Corresponding Author (KA) has the right to grant on behalf of all authors and does grant on behalf of all authors, an exclusive licence on a worldwide basis to the BMJ Publishing Group Ltd to permit this article (if accepted) to be published in BMJ editions and any other BMJ PGL products and sublicenses such use and exploit all subsidiary rights, as set out in our licence.

The manuscript's guarantor (KA) affirms that the manuscript is an honest, accurate, and transparent account of the study being reported; that no important aspects of the study have been omitted; and that any discrepancies from the study as originally planned (and, if relevant, registered) have been explained.

**Dissemination declaration**

Dissemination the results to study participants is not possible.

## References

1. Williams B, Mancia G, Spiering W, et al. 2018 ESC/ESH Guidelines for the management of arterial hypertension. *Eur Heart J*. 2018;39(33):3021-104.
2. Umemura S, Arima H, Arima S, et al. The Japanese Society of Hypertension Guidelines for the Management of Hypertension (JSH 2019). *Hypertens Res*. 2019;42(9):1235-481.
3. Law MR, Morris JK, Wald NJ. Use of blood pressure lowering drugs in the prevention of cardiovascular disease: meta-analysis of 147 randomised trials in the context of expectations from prospective epidemiological studies. *BMJ*. 2009;338:b1665.
4. Asayama K, Li Y, Franklin SS, et al. Cardiovascular risk associated with white-coat hypertension: con side of the argument. *Hypertension*. 2017;70(4):676-82.
5. Imai Y, Hosaka M, Elnagar N, et al. Clinical significance of home blood pressure measurements for the prevention and management of high blood pressure. *Clin Exp Pharmacol Physiol*. 2014;41(1):37-45.
6. Imai Y, Ohkubo T, Hozawa A, et al. Usefulness of home blood pressure measurements in assessing the effect of treatment in a single-blind placebo-controlled open trial. *J Hypertens*. 2001;19(2):179-85.
7. Ohkubo T, Imai Y, Tsuji I, et al. Home blood pressure measurement has a stronger predictive power for mortality than does screening blood pressure measurement: a population-based observation in Ohasama, Japan. *J Hypertens*. 1998;16(7):971-75.
8. Asayama K, Ohkubo T, Kikuya M, et al. Prediction of stroke by self-measurement of blood pressure at home versus casual screening blood pressure measurement in relation to the JNC-7 classification: the Ohasama study. *Stroke*. 2004;35(10):2356-61.
9. Whelton PK, Carey RM, Aronow WS, et al. 2017 ACC/AHA/AAPA/ABC/ACPM/AGS/APhA/ASH/ASPC/NMA/PCNA Guideline for

- 1  
2  
3  
4 the Prevention, Detection, Evaluation, and Management of High Blood Pressure in  
5  
6 Adults: A Report of the American College of Cardiology/American Heart  
7  
8 Association Task Force on Clinical Practice Guidelines. *Hypertension*.  
9  
10 2018;71(6):e13-e115.  
11  
12 10. Schmieder RE, Schmidt ST, Riemer T, et al. Disproportional decrease in office blood  
13  
14 pressure compared with 24-hour ambulatory blood pressure with antihypertensive  
15  
16 treatment: dependency on pretreatment blood pressure levels. *Hypertension*.  
17  
18 2014;64(5):1067-72.  
19  
20 11. Soranna D, Zambon A, Corrao G, et al. Different effects of antihypertensive treatment  
21  
22 on office and ambulatory blood pressure: a meta-analysis. *J Hypertens*.  
23  
24 2019;37(3):467-75.  
25  
26 12. Wilder J. Basimetric approach (law of initial value) to biological rhythms. *Ann N Y*  
27  
28 *Acad Sci*. 1962;98:1211-20.  
29  
30 13. Fujiwara T, Nishimura T, Ohkuko T, et al. Rationale and design of HOMED-BP Study:  
31  
32 hypertension objective treatment based on measurement by electrical devices of  
33  
34 blood pressure study. *Blood Press Monit*. 2002;7(1):77-82.  
35  
36 14. Asayama K, Ohkubo T, Metoki H, et al. Cardiovascular outcomes in the first trial of  
37  
38 antihypertensive therapy guided by self-measured home blood pressure.  
39  
40 *Hypertens Res*. 2012;35(11):1102-10.  
41  
42 15. Watabe D, Asayama K, Hanazawa T, et al. Predictive power of home blood pressure  
43  
44 indices at baseline and during follow-up in hypertensive patients: HOMED-BP  
45  
46 study. *Hypertens Res*. 2018;41(8):622-28.  
47  
48 16. Hansson L, Hedner T, Dahlof B. Prospective randomized open blinded end-point  
49  
50 (PROBE) study. A novel design for intervention trials. Prospective Randomized  
51  
52 Open Blinded End-Point. *Blood Press*. 1992;1(2):113-9.  
53  
54  
55  
56  
57  
58  
59  
60

- 1  
2  
3  
4 17. Chonan K, Kikuya M, Araki T, et al. Device for the self-measurement of blood  
5  
6 pressure that can monitor blood pressure during sleep. *Blood Press Monit.*  
7  
8 2001;6(4):203-05.  
9
- 10 18. White WB, Anwar YA. Evaluation of the overall efficacy of the Omron office digital  
11  
12 blood pressure HEM-907 monitor in adults. *Blood Press Monit.* 2001;6(2):107-10.  
13
- 14 19. Asayama K, Ohkubo T, Hanazawa T, et al. Does antihypertensive drug class affect  
15  
16 day-to-day variability of self-measured home blood pressure? the HOMED-BP  
17  
18 study. *J Am Heart Assoc.* 2016;5(3):e002995.  
19
- 20 20. Satoh M, Haga T, Hosaka M, et al. The velocity of antihypertensive effects of seven  
21  
22 angiotensin II receptor blockers determined by home blood pressure  
23  
24 measurements. *J Hypertens.* 2016;34(6):1218-23.  
25
- 26 21. World Health Organization. World Health Organization Collaborating Centre for Drug  
27  
28 Statistics Methodology System of Defined Daily Doses. 2018 [updated September  
29  
30 14, 2018]. Available from: [http://www.whocc.no/atc\\_ddd\\_index/](http://www.whocc.no/atc_ddd_index/)  
31  
32
- 33 22. Staessen J, Amery A, Fagard R. Isolated systolic hypertension in the elderly. *J*  
34  
35 *Hypertens.* 1990;8(5):393-405.  
36
- 37 23. Messerli FH, Rexhaj E. Of headwind and tailwind, regression to the mean and  
38  
39 Wilder's principle. *J Hypertens.* 2019;37(1):4-5.  
40  
41
- 42 24. Ohkubo T, Asayama K, Kikuya M, et al. How many times should blood pressure be  
43  
44 measured at home for better prediction of stroke risk? Ten-year follow-up results  
45  
46 from the Ohasama study. *J Hypertens.* 2004;22(6):1099-104.  
47
- 48 25. Vaur L, Dubroca II, Dutrey-Dupagne C, et al. Superiority of home blood pressure  
49  
50 measurements over office measurements for testing antihypertensive drugs.  
51  
52 *Blood Press Monit.* 1998;3(2):107-14.  
53
- 54 26. Asayama K, Hozawa A, Taguri M, et al. Blood pressure, heart rate, and double  
55  
56 product in a pooled cohort: the Japan Arteriosclerosis Longitudinal Study. *J*  
57  
58 *Hypertens.* 2017;35(9):1808-15.  
59  
60

- 1  
2  
3  
4 27. Wolf-Maier K, Cooper RS, Banegas JR, et al. Hypertension prevalence and blood  
5  
6 pressure levels in 6 European countries, Canada, and the United States. *JAMA*.  
7  
8 2003;289(18):2363-9.  
9
- 10 28. Borden WB, Maddox TM, Tang F, et al. Impact of the 2014 expert panel  
11  
12 recommendations for management of high blood pressure on contemporary  
13  
14 cardiovascular practice: insights from the NCDR PINNACLE registry. *J Am Coll*  
15  
16 *Cardiol*. 2014;64(21):2196-203.  
17
- 18 29. Xu W, Goldberg SI, Shubina M, et al. Optimal systolic blood pressure target, time to  
19  
20 intensification, and time to follow-up in treatment of hypertension: population  
21  
22 based retrospective cohort study. *BMJ*. 2015;350:h158.  
23
- 24 30. Gradman AH, Parise H, Lefebvre P, et al. Initial combination therapy reduces the risk  
25  
26 of cardiovascular events in hypertensive patients: a matched cohort study.  
27  
28 *Hypertension*. 2013;61(2):309-18.  
29
- 30 31. Spence JD, Rayner BL. J curve and cuff artefact, and diagnostic inertia in resistant  
31  
32 hypertension. *Hypertension*. 2016;67(1):32-3.  
33
- 34 32. Phillips LS, Branch WT, Cook CB, et al. Clinical inertia. *Ann Intern Med*.  
35  
36 2001;135(9):825-34.  
37  
38  
39  
40  
41  
42  
43  
44  
45  
46  
47  
48  
49  
50  
51  
52  
53  
54  
55  
56  
57  
58  
59  
60



## Figure legends

### **Figure 1: Time course of blood pressure measurement during the study period.**

Home blood pressures were the average of 5 days before randomisation without any antihypertensive treatment, after 10 to 28 days of monotherapy initiation, and at the end of follow-up period. Patients with 3 to 4 days of home blood pressure data in each interval were also included. ACEI, angiotensin-converting enzyme inhibitor; ARB, angiotensin receptor blocker; CCB, calcium channel blocker.

### **Figure 2. Reduction in the systolic home blood pressure during monotherapy categorized by pretreatment home (left panel) and office (right panel) blood pressure.**

Error bars indicate 95% confidence interval. Data were adjusted for sex, age, body mass index, diabetes mellitus, current smoking and drinking, hypercholesterolemia, history of cardiovascular disease, and defined daily dose during monotherapy.

### **Figure 3. Reduction in the systolic home blood pressure during monotherapy categorized by pretreatment home blood pressure, stratified by defined daily dose (0.5 unit, left panel; 1 unit, right panel).**

Error bars indicate 95% confidence interval. Data were adjusted for sex, age, body mass index, diabetes mellitus, current smoking and drinking, hypercholesterolemia, and history of cardiovascular disease.

### **Figure 4. Reduction in the follow-up systolic home blood pressure categorized by pretreatment office blood pressure.**

Error bars indicate 95% confidence interval. Adjusted for sex, age, body mass index, diabetes mellitus, current smoking and drinking, hypercholesterolemia, history of cardiovascular disease, and defined daily dose at the end of follow-up period (mean, 7.0 years).

**Table 1: Baseline characteristics of patients.**

| Characteristics                     | Total        | Systolic home blood pressure at baseline, mmHg |               |               |               | <i>P</i> |
|-------------------------------------|--------------|------------------------------------------------|---------------|---------------|---------------|----------|
|                                     |              | <145                                           | 145–154       | 155–164       | ≥165          |          |
| No. of participants                 | 2423         | 763                                            | 699           | 544           | 417           |          |
| Women, n                            | 1235 (51.0)  | 416 (54.5)                                     | 342 (48.9)*   | 275 (50.6)    | 202 (48.4)    | 0.11     |
| Age, years                          | 60.0 (9.8)   | 59.3 (10.0)                                    | 59.3 (9.7)    | 61.0 (9.8)†   | 61.3 (9.5)    | 0.0003   |
| Body mass index, kg/m <sup>2</sup>  | 24.4 (3.3)   | 24.2 (3.5)                                     | 24.2 (3.2)    | 24.6 (3.4)    | 24.8 (3.2)    | 0.0017   |
| Smoking, n                          | 501 (20.7)   | 142 (18.6)                                     | 138 (19.7)    | 112 (20.6)    | 109 (26.1)*   | 0.019    |
| Drinking, n                         | 1172 (48.4)  | 347 (45.5)                                     | 344 (49.2)    | 270 (49.6)    | 211 (50.6)    | 0.27     |
| Diabetes mellitus, n                | 378 (15.6)   | 122 (16.0)                                     | 101 (14.4)    | 85 (15.6)     | 70 (16.8)     | 0.74     |
| Hypercholesterolemia, n             | 1261 (52.0)  | 399 (52.3)                                     | 372 (53.2)    | 287 (52.8)    | 203 (48.7)    | 0.49     |
| Previous cardiovascular diseases, n | 66 (2.7)     | 25 (3.3)                                       | 17 (2.4)      | 17 (3.1)      | 7 (1.7)       | 0.37     |
| Home blood pressure                 |              |                                                |               |               |               |          |
| Systolic, mmHg                      | 152.5 (11.6) | 139.8 (3.0)                                    | 149.6 (2.9)§  | 159.4 (2.8)§  | 171.3 (4.3)§  | <0.0001  |
| Diastolic, mmHg                     | 89.8 (10.3)  | 84.4 (8.4)                                     | 89.8 (8.9)§   | 92.6 (10.0)§  | 95.9 (10.9)§  | <0.0001  |
| Office blood pressure               |              |                                                |               |               |               |          |
| Systolic, mmHg                      | 154.7 (17.4) | 147.7 (15.5)                                   | 153.7 (16.5)§ | 157.8 (16.5)§ | 165.4 (17.1)§ | <0.0001  |
| Diastolic, mmHg                     | 90.1 (12.2)  | 87.1 (11.2)                                    | 90.4 (11.8)§  | 91.1 (12.3)   | 94.0 (13.1)‡  | <0.0001  |

Values are expressed as the arithmetic mean (standard deviation) or number (%). *P* values are calculated by an analysis of variance or the chi-squared test among the four systolic home blood pressure groups at baseline during pretreatment. For missing values of body mass index ( $n=40$ ), single imputation with regression on sex and age was conducted.

Significance of differences from the left adjacent column: \* $P<0.05$ , † $P<0.01$ , ‡ $P<0.001$ , and § $P<0.0001$ .

**Table 2: Home systolic blood pressure values according to the measurement days.**

| Baseline blood pressure category | Number of patients | Home blood pressure measurement days (times) |              |              |              |              | <i>P</i> |
|----------------------------------|--------------------|----------------------------------------------|--------------|--------------|--------------|--------------|----------|
|                                  |                    | First                                        | Second       | Third        | Forth        | Fifth        |          |
| Pretreatment, mmHg               |                    |                                              |              |              |              |              |          |
| All                              | 2423               | 152.5 (14.7)                                 | 152.5 (14.8) | 152.2 (14.9) | 152.4 (14.6) | 152.6 (14.9) | 0.48     |
| <145                             | 763                | 140.3 (9.1)                                  | 139.6 (8.4)  | 139.1 (8.8)  | 139.7 (8.2)  | 140.4 (9.6)  | 0.032    |
| 145–154                          | 699                | 149.6 (9.9)                                  | 150.0 (9.4)  | 149.5 (9.7)  | 149.5 (9.2)  | 149.5 (9.5)  | 0.85     |
| 155–164                          | 544                | 159.3 (10.3)                                 | 158.7 (10.3) | 159.5 (9.6)  | 159.8 (9.7)  | 159.8 (10.5) | 0.41     |
| ≥165                             | 417                | 170.9 (11.3)                                 | 172.0 (10.3) | 171.1 (10.4) | 171.0 (11.2) | 171.4 (11.5) | 0.66     |
| Monotherapy, mmHg                |                    |                                              |              |              |              |              |          |
| All                              | 2423               | 145.5 (17.0)                                 | 145.2 (16.9) | 145.4 (16.5) | 145.4 (16.5) | 144.7 (16.6) | 0.58     |
| <145                             | 763                | 135.3 (13.2)                                 | 135.1 (13.1) | 135.5 (13.4) | 135.8 (13.2) | 135.1 (13.1) | 0.56     |
| 145–154                          | 699                | 143.8 (13.8)                                 | 143.1 (13.3) | 143.3 (13.0) | 142.9 (13.3) | 141.9 (12.9) | 0.035    |
| 155–164                          | 544                | 150.2 (15.3)                                 | 150.5 (15.4) | 150.5 (14.6) | 151.2 (14.4) | 150.5 (14.7) | 0.67     |
| ≥165                             | 417                | 161.1 (16.5)                                 | 160.0 (17.0) | 160.3 (15.4) | 160.1 (16.1) | 160.5 (15.9) | 0.65     |

Values are expressed as the arithmetic mean (standard deviation). The numbers of patients with missing blood pressure data on the fourth and fifth days were 38 and 84 at pretreatment and 87 and 286 during monotherapy, respectively, while *P* values are calculated by a repeated measure mixed linear model to take missing values into account and represent the differences among the five systolic home blood pressure values according to the measurement day at baseline during pretreatment.

Differences between the adjacent days were not significant during pretreatment ( $P \geq 0.12$ ) or monotherapy ( $P \geq 0.14$ ).

1  
2  
3  
4  
5  
6  
7  
8  
9  
10  
11  
12  
13  
14  
15  
16  
17  
18  
19  
20  
21  
22  
23  
24  
25  
26  
27  
28  
29  
30  
31  
32  
33  
34  
35  
36  
37  
38  
39  
40  
41  
42  
43  
44  
45  
46  
47  
48  
49  
50  
51  
52  
53  
54  
55  
56  
57  
58  
59  
60

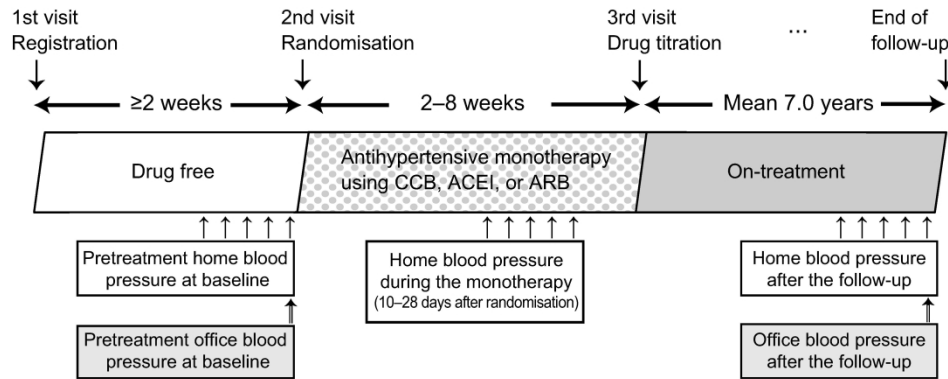

Figure 1: Time course of blood pressure measurement during the study period. Home blood pressures were the average of 5 days before randomisation without any antihypertensive treatment, after 10 to 28 days of monotherapy initiation, and at the end of follow-up period. Patients with 3 to 4 days of home blood pressure data in each interval were also included. ACEI, angiotensin-converting enzyme inhibitor; ARB, angiotensin receptor blocker; CCB, calcium channel blocker.

193x74mm (600 x 600 DPI)

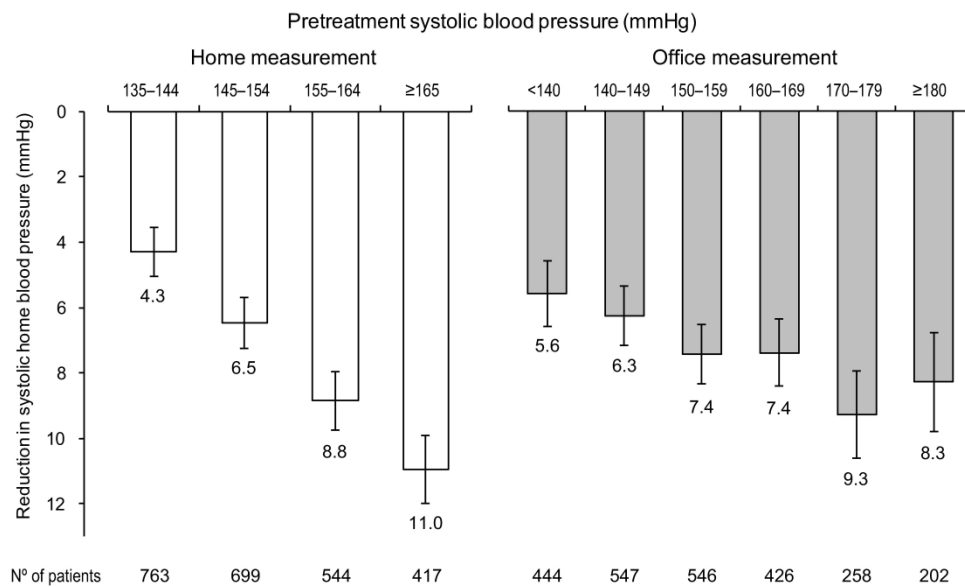

Figure 2. Reduction in the systolic home blood pressure during monotherapy categorized by pretreatment home (left panel) and office (right panel) blood pressure. Error bars indicate 95% confidence interval. Data were adjusted for sex, age, body mass index, diabetes mellitus, current smoking and drinking, hypercholesterolemia, history of cardiovascular disease, and defined daily dose during monotherapy.

236x144mm (600 x 600 DPI)

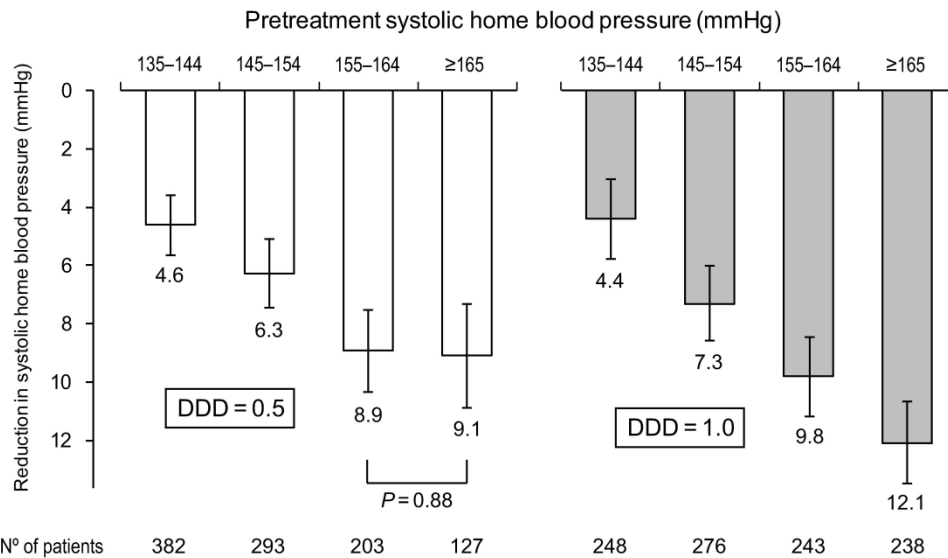

Figure 3. Reduction in the systolic home blood pressure during monotherapy categorized by pretreatment home blood pressure, stratified by defined daily dose (0.5 unit, left panel; 1 unit, right panel). Error bars indicate 95% confidence interval. Data were adjusted for sex, age, body mass index, diabetes mellitus, current smoking and drinking, hypercholesterolemia, and history of cardiovascular disease.

206x119mm (600 x 600 DPI)

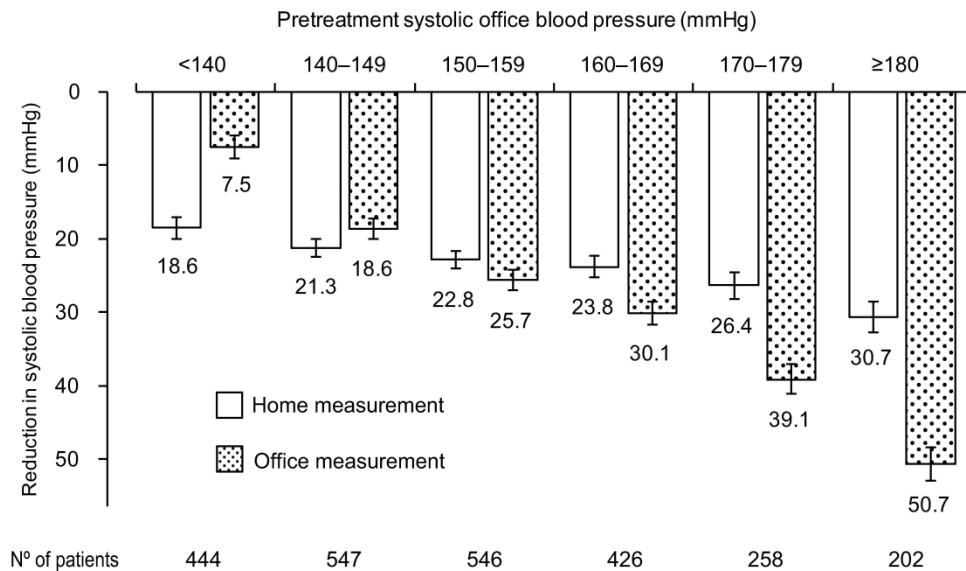

Figure 4. Reduction in the follow-up systolic home blood pressure categorized by pretreatment office blood pressure.

Error bars indicate 95% confidence interval. Adjusted for sex, age, body mass index, diabetes mellitus, current smoking and drinking, hypercholesterolemia, history of cardiovascular disease, and defined daily dose at the end of follow-up period (mean, 7.0 years).

196x115mm (600 x 600 DPI)

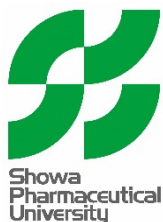

DVIII (18/05/20 12:58)  
Hihom8\_spl  
BMJ Open

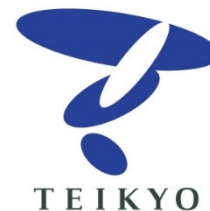

## SUPPLEMENTARY INFORMATION

### **Antihypertensive drug effect according to the pretreatment self-measured home blood pressure: the HOMED-BP study**

Short title: Wilder Law on Home Blood Pressure

Hikari Sano, Azusa Hara, Kei Asayama, Seiko Miyazaki,  
Masahiro Kikuya, Yutaka Imai, Takayoshi Ohkubo,  
on behalf of

Hypertension Objective Treatment Based on Measurement  
by Electrical Devices of Blood Pressure (HOMED-BP) investigators

This appendix function as part of the original submission and has been peer-reviewed.

We have posted it as supplied by the authors.



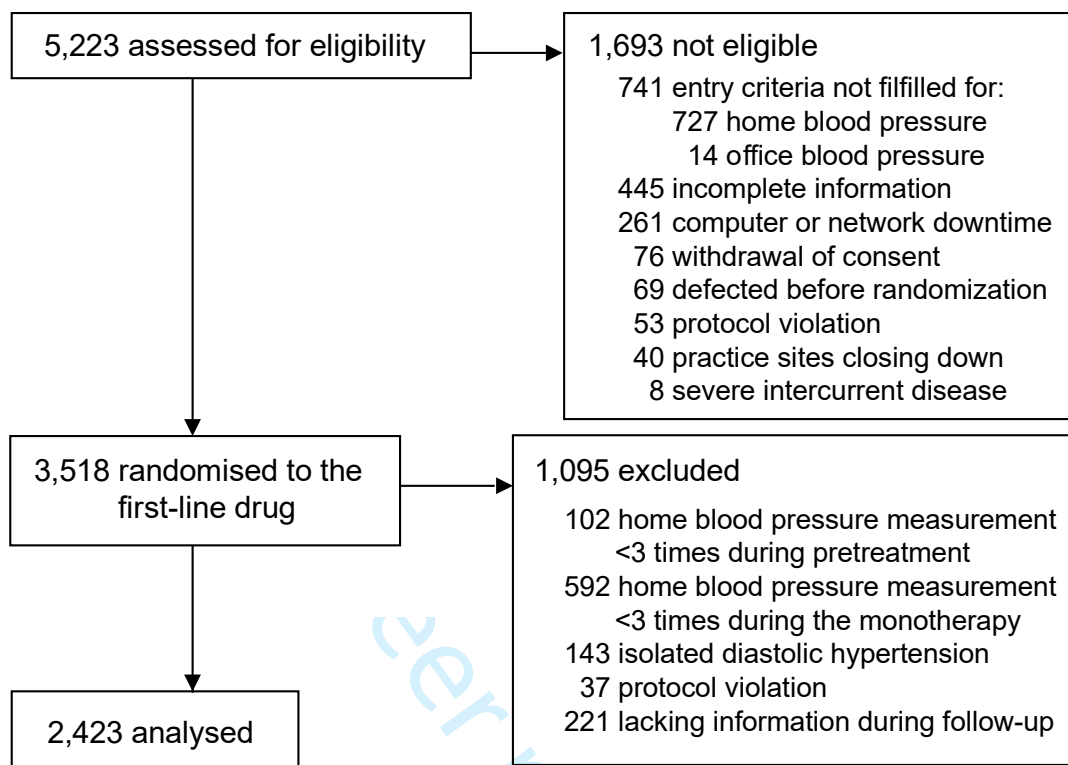

**Supplemental Figure 1: Flowchart of the study.**

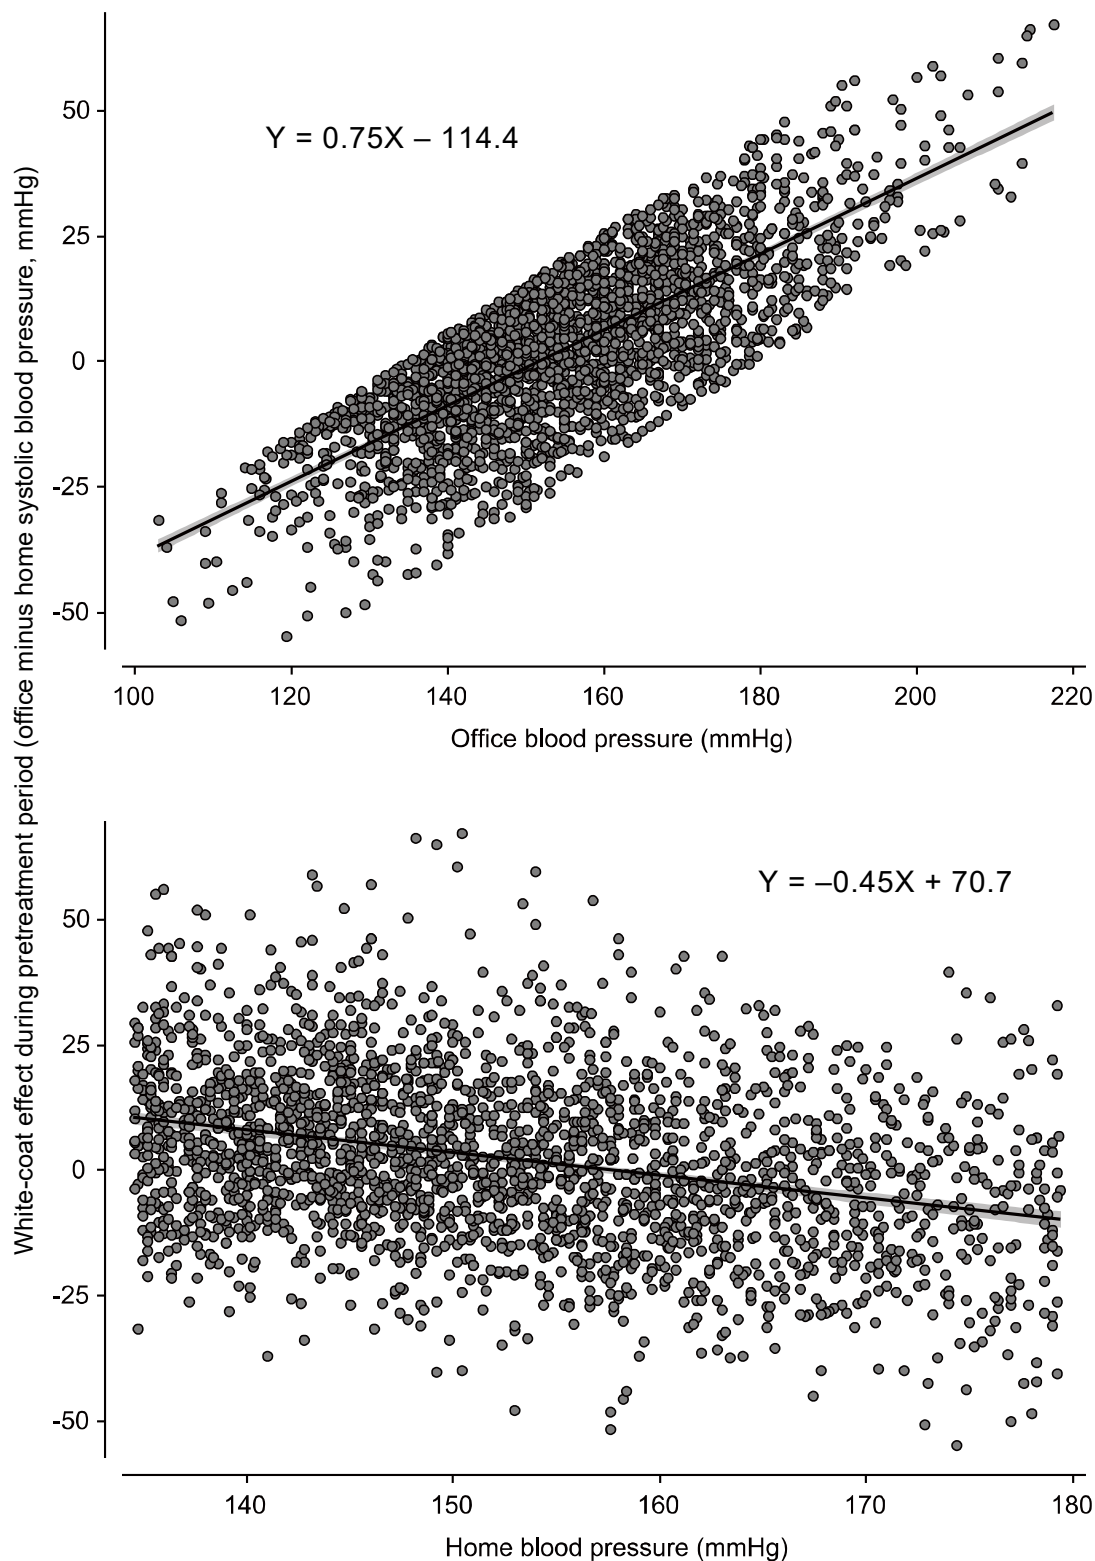

**Supplemental Figure 2: Relationship between the white-coat effect and office systolic blood pressure (A) as well as home blood pressure (B) during pretreatment period.**

The white-coat effect was defined as the office blood pressure minus the home blood pressure as a continuous variable. Regression line with 95% confidence limits were overlay on each scatter plot. Because systolic home blood pressure ranged 135–179 mmHg in this population, plots in panel A demonstrate as a band-like distribution which rises to the right.

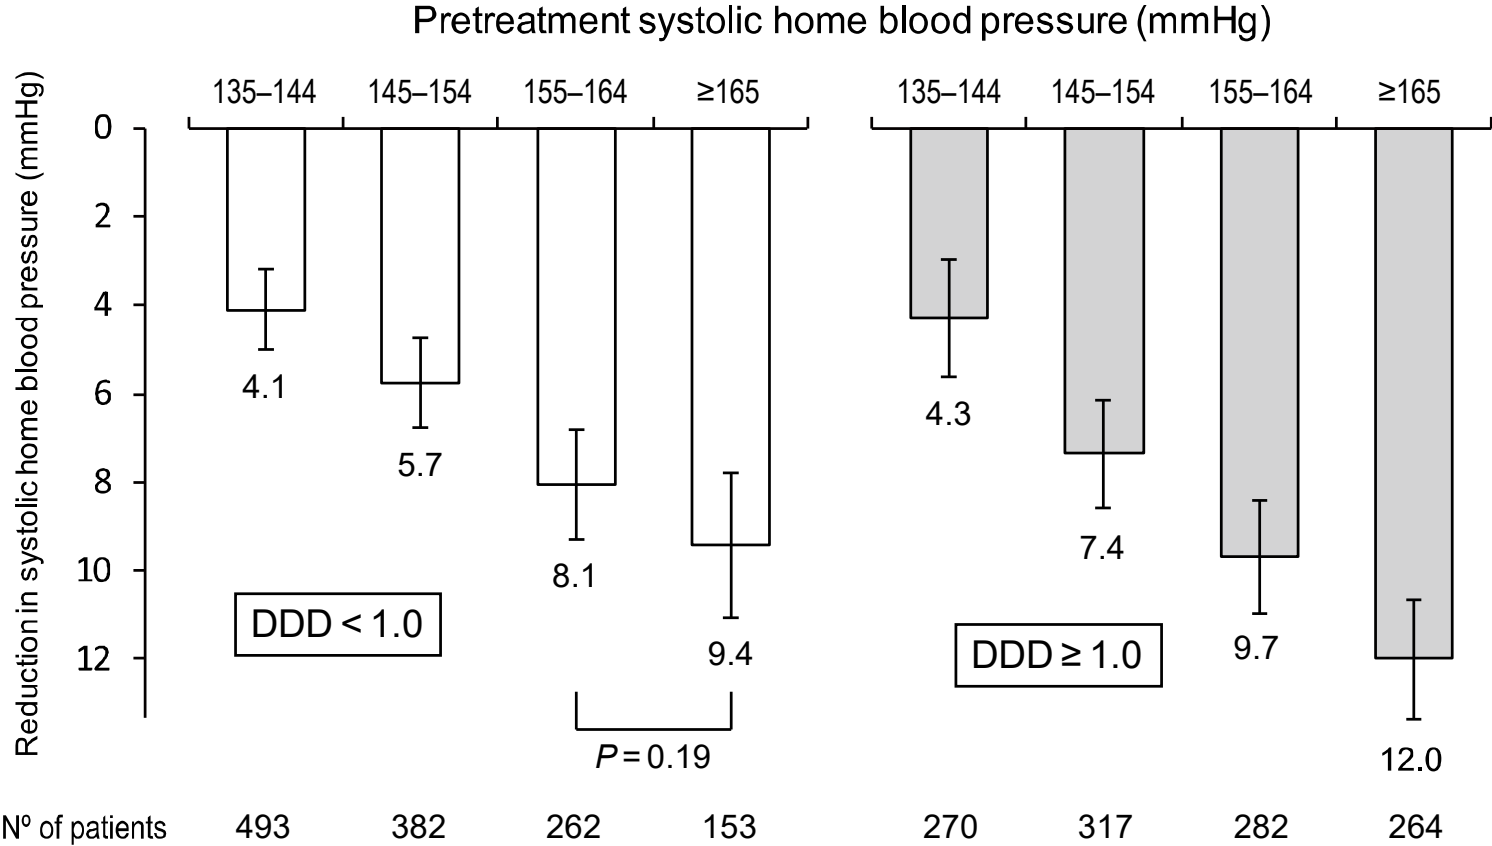

**Supplemental Figure 3: Reduction in the systolic home blood pressure during monotherapy categorized by pretreatment home blood pressure and stratified by defined daily dose (<1 unit, left panel; ≥1 unit, right panel).**

Error bars indicate 95% confidence interval. Data were adjusted for sex, age, body mass index, diabetes mellitus, current smoking and drinking, hypercholesterolemia, history of cardiovascular disease, and defined daily dose during monotherapy.

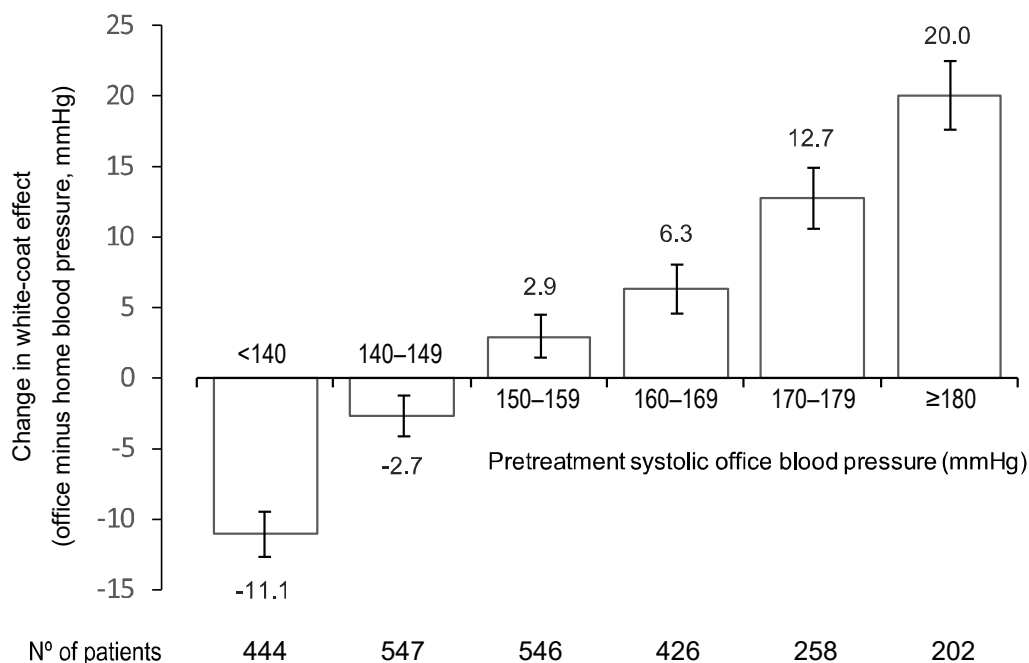

**Supplemental Figure 4: Changes in the white-coat effect during follow-up categorized by the pretreatment office blood pressure.**

Error bars indicate 95% confidence interval. The white-coat effect was defined as the office blood pressure minus the home blood pressure, and changes in the white-coat effect were determined by subtracting the effect observed at the end of follow-up period from the effect during pretreatment.

## Appendix

### Hypertension Objective Treatment Based on Measurement by Electrical Devices of Blood Pressure (HOMED-BP) investigators:

#### Coordination and management

**Principal investigator:** Y. Imai.

**Advisory committee:** K. Arakawa, M. Fujishima (deceased), J. Fujii, K. Fukiyama, S. Hisamichi, O. Iimura, M. Ishii, T. Omae, T. Saruta, and K. Yoshinaga.

**Steering committee:** I. Abe, K. Abe, T. Abukawa, T. Ashida, N. Dohba, T. Etoh, A. Fujimura, T. Fujita, A. Fukui, T. Gotoh, H. Hama, T. Hano, H. Hayashi, N. Hayashida, M. Hayashi, K. Hiramori, Y. Hirai, Y. Hirata, K. Hiwada, K. Hora, S. Ichikawa, T. Iida, T. Ikeda, T. Imaizumi, K. Ishikawa, I. Ito, M. Ito, S. Ito, D. Iwaoka, K. Kanamasa, T. Katagiri, S. Katayama, H. Kawamura, Y. Kawano, H. Kida, K. Kikuchi, G. Kimura, K. Kimura, H. Kitaoka, S. Kobayashi, K. Kohara, S. Kojima, I. Komuro, H. Kumagai, Y. Kumagai, E. Kusano, T. Kushiro, I. Kuwajima, Y. Maruyama, F. Masani, H. Matsubara, T. Matsubara, M. Matsumoto, H. Matsuoka, H. Matsuura, Y. Mishima, M. Miura, I. Miyamori, H. Mori, H. Murakami, H. Muratani, M. Nakagawa, K. Nakao, M. Naruse, I. Nishio, T. Ogihara, M. Ohta, K. Ohtsuka, Y. Ohtsuka, Y. Ohuchi, S. Oikawa, M. Okabe, K. Okumura, I. Saitoh, H. Saitoh, T. Sakata, K. Saku, H. Sasaki, M. Seino, S. Senda, K. Shimada, K. Shimamoto, M. Shimizu, T. Shiomi, K. Shirato, M. Sone, H. Suzuki, S. Suzuki, H. Takahashi, M. Takada, K. Takeda, N. Takeda, A. Takeshita, S. Takishita, S. Tanaka, K. Toba, O. Tochikubo, H. Tomoike, Y. Ueno, S. Umemura, H. Urata, T. Watanabe, K. Yamada, T. Yamaguchi, M. Yamakado, Y. Yamamoto, Y. Yamamoto, A. Yamashina, H. Yokoyama, and M. Yoshimura.

**Management committee:** Y. Imai, T. Ohkubo, K. Asayama, H. Satoh, Y. Kondo, K. Totsune, Y. Miura.

**Safety monitoring and information security committee:** H. Satoh, R. Inoue, H. Shishido, Y. Kondo.

**Endpoint committee:** H. Katagiri, K. Miura, A. Fujiyoshi, A. Kadota, N. Takashima, S. Nagasawa, S. Torii, S. Kadowaki, T. Hisamatsu, S. Suzuki, T. Ito, Y. Oka.

**Data management committee:** H. Metoki, S. Saito, K. Hosohata, T. Kato, C. Takahashi, M. Kikuya, L. Thijs, T. Ohkubo.

**Operation center:** K. Asayama, T. Fujiwara, T. Nishimura, Y. Aoki, Y. Fushimi, H. Shishido, A. Kohinata, Y. Kanno, M. Osugi, M. Suzuki, M. Saito, T. Tamura, N. Fukushima, S. Sakuma, S. Katada, K. Sakurai, M. Sato, T. Hirose, A. Satoh, T. Obara.

## Clinical investigators

**Hokkaido:** T. Ando, J. Anzai, S. Hosoda, M. Iida, K. Ito, I. Kinbara, M. Koizumi, Y. Masuda, K. Matsumoto, T. Mito, T. Miyamura, H. Morimoto, M. Nakagawa, T. Noto, K. Oda, Y. Ogawa, M. Shiiki, M. Shiraishi, K. Shiraishi, M. Tada, Y. Takagawa, K. Takahashi, S. Tanaka, S. Yonekura.

**Tohoku:** H. Abe, M. Aihara, Y. Amada, Y. Ando, I. Aoyama, I. Aoyama, F. Araki, K. Asayama, S. Egawa, Y. Emura, T. Fujita, K. Fukami, T. Goto, T. Hayakawa, Y. Hayashi, T. Hayashi, T. Hirose, N. Hiwatari, H. Hoshi, N. Imai, Y. Imai, M. Inoue, K. Ishibashi, H. Ishii, Y. Ishi-kawa, M. Ito, H. Ito, T. Ito, K. Ito, K. Ito, M. Iwamoto, H. Jin, M. Kamimoto, A. Kanno, S. Kashima, S. Kataoka, K. Kawamorita, Y. Kawamorita, S. Kibira, K. Kikuchi, K. Kikuchi, M. Kikuya, Y. Kimura, H. Kimura, M. Kimura, M. Kishi, A. Kitabayashi, K. Komai, T. Kondo, K. Kurosawa, S. Kutsuzawa, S. Kyogoku, K. Machii, H. Mashiko, K. Matsuo, H. Metoki, O. Minami, H. Misawa, Y. Miyazaki, R. Mori, H. Morikawa, K. Morita, T. Mouri, S. Nagai, K. Nakamura, D. Nakayama, K. Nihei, K. Ohira, E. Ohtomo, F. Okuguchi, A. Omoto, Y. Ono, Y. Otsuka, K. Saeki, H. Sakuma, S. Sasaki, T. Sato, E. Sato, S. Satoho, J. Seino, H. Seki, M. Sekino, A. Shibasaki, K. Shimada, Y. Shimanaka, Y. Shishido, K. Sone, T. Sugawara, H. Suzuki, H. Suzuki, Y. Suzuki, J. Tajima, Y. Takagi, K. Takahashi, H. Takahashi, Y. Takaya, H. Tanaka, N. Tanno, Y. Tanno, G. Tashima, M. Techigawara, Y. Tominaga, H. Toyama, Y. Tsukahara, H. Unakami, M. Wada, N. Watanabe, T. Watanabe, M. Watanabe, S. Watanabe, H. Watanabe, T. Yabuki, C. Yagi, N. Yamada, Z. Yamada, T. Yamagishi, N. Yamamoto, H. Yamamoto, H. Yamamoto, H. Yokkaichi.

**Kanto:** S. Abe, M. Adachi, N. Akiyama, H. Aoki, M. Arai, T. Arai, S. Arai, T. Cho, S. Dotare, T. Fujito, K. Fukuda, T. Fukutome, H. Funayama, T. Gomi, Y. Hamada, K. Hasegawa, M. Hashida, A. Hashimoto, Y. Hatori, H. Higashi, S. Higashi, N. Hirawa, T. Honzawa, K. Hori, K. Horie, H. Horikoshi, T. Hoshino, K. Ichikawa, K. Ieki, C. Iguchi, T. Ikeda, T. Iketani, M. Inaba, S. Inokuma, Y. Ishimaru, S. Ito, M. Iwasaki, K. Kanouzawa, S. Kanouzawa, M. Kato, H. Kawamura, K. Kimura, Y. Kodama, I. Koga, H. Koide, T. Koitabashi, N. Koshikawa, T. Kudo, Y. Kumagai, F. Kurata, M. Kurosawa, K. Kuwaki, T. Masuda, R. Matsunaga, M. Miyakawa, H. Mori, T. Nagao, C. Nakajima, M. Nakamura, M. Nakano, T. Nakayama, K. Nemoto, H. Nishimura, Y. Noda, S. Noji, K. Noma, T. Noshiro, Y. Nozaki, k. Okamoto, K. Okano, Y. Ooba, E. Osuga, H. Saito, J. Sakurai, T. Sato, H. Sato, T. Sekihara, K. Seta, J. Shimizu, T. Shinozaki, H. Suga, M. Suzuki, R. Takahata, H. Takata, K. Takayama, H. Takigawa, T. Teramoto, S. Tsukagoshi, T. Ueda, T. Umetsu, M. Ushiyama, Y. Watanabe, N. Yagi, C. Yamada, H. Yamaguchi, M. Yamakado, H. Yamamoto, T. Yamamoto, S. Yamashina, M. Yanagisawa, F. Yasuda, S. Yatagai, H. Yoshimatsu.

1  
2  
3  
4 ***Chu-bu and Hokuriku:*** N. Adachi, F. Akaoka, S. Akira, F. Ando, S. Asai, A. Asaji, S. Asato, K.  
5 Goto, K. Hayashi, N. Hieda, H. Higashi, K. Hirahara, H. Horie, M. Hoshiai, T. Iida, T. Ise, J. Ishiguro,  
6 S. Ishikawa, A. Ito, J. Kamijo, S. Kato, N. Kato, Y. Kawamura, I. Kawamura, H. Kobayashi, N.  
7 Kojima, Y. Koyama, M. Kozuka, K. Kuroda, T. Matsu, H. Matsumoto, J. Mihara, H. Mori, T. Morise,  
8 A. Naito, T. Nakagawa, S. Nakajima, T. Nakamura, H. Nakayama, H. Nishino, O. Nojiri, T. Ohno, N.  
9 Ohya, N. Okanishi, K. Okazaki, S. Oohashi, T. Ookura, T. Saeki, R. Saito, K. Sakakura, K. Satake,  
10 M. Senga, K. Sugiura, S. Sugiyama, Y. Suzaki, S. Suzuki, C. Takaeda, S. Takahashi, Y. Takahira,  
11 H. Takakuwa, H. Takakuwa, K. Takasawa, M. Takata, N. Takeuchi, N. Takeuchi, H. Tamagaki, Y.  
12 Terada, M. Tobe, K. Uchiba, K. Uwatoko, Y. Yamaguchi, Y. Yamamoto, H. Yamamoto, S.  
13 Yokoyama.

14  
15  
16  
17  
18  
19  
20 ***Kansai:*** M. Amemori, S. Fujita, M. Fujiwara, S. Goto, Y. Hamaguchi, K. Hayashi, N. Hirobe, N. Imai,  
21 M. Iwane, T. Kanaya, K. Kanemasa, J. Kasahara, H. Kato, S. Katsuya, H. Kishima, K. Kitayama, M.  
22 Koide, K. Komaki, K. Konishi, Y. Kurimoto (deceased), T. Majima, A. Masui, M. Nagai, H. Nagai, K.  
23 Nagao, K. Nakamura, K. Nakamuta, S. Nishi, A. Nogami, S. Ono, T. Orito, N. Sakamoto, I. Sano, S.  
24 Sawada, H. Sawaoka, H. Shimakoshi, Y. Shimakoshi, K. Shirai, H. Suzuki, N. Suzuki, N. Takahashi,  
25 N. Takeda, Y. Takeda, Y. Takemoto, T. Takenaka, K. Tamai, Y. Terayama, M. Ueda, T. Ueda, I.  
26 Watanabe, T. Yamaguchi, O. Yamaoka, K. Yasui, S. Yo, K. Yoshida, H. Yoshikawa.

27  
28  
29  
30  
31 ***Chu-goku:*** T. Furue, Y. Furukawa, M. Gen, M. Harada, K. Iwasaki, M. Kahara, M. Kamura, K. Kida,  
32 J. Minami, K. Mizuno, K. Murata, Y. Nakamura, K. Nakayasu, C. Ogurusu, A. Ohtahara, M.  
33 Osakata, S. Sasaki, N. Sasaki, H. Sugiura, S. Tenou, A. Tokunaga, Y. Tominaga (deceased), T.  
34 Yoshimoto.

35  
36  
37  
38 ***Shikoku:*** M. Arizumi, K. Fujino, T. Fukui, S. Furumoto, W. Furumoto, T. Inoue, R. Kawamoto, M.  
39 Kimura, Y. Kitami, A. Kobaru, F. Kouno, C. Matsumoto, T. Matsuno, S. Mizobuchi, H. Mizobuchi, S.  
40 Nishiyama, T. Okabe, T. Okura, A. Ota, M. Takeuchi, S. Ueta, H. Yamamoto, T. Yokoi, K. Yoshida.

41  
42  
43 ***Kyusyu and Okinawa:*** K. Abe, S. Arima, T. Asato, T. Aso, T. Endo, Y. Endo, T. Fujino, Y.  
44 Fujishima, K. Funatsu, S. Hamasaki, O. Hano, Y. Hirooka, C. Hirota, T. Homma, Y. Inobe, J. Inoue,  
45 T. Iwaoka, H. kamiya, Y. Karimata, Y. Kimura, K. Kitano, H. Koga, M. Kouno, A. Kuwahara, Y.  
46 Masuda, J. Miyagi, Y. Miyazaki, Y. Muta, M. Nagata, N. Nagayoshi, H. Nakamura, Y. Nakamura, H.  
47 Nakano, S. Naomi, K. Ninomiya, F. Omori, T. Ono, K. Onoyama, W. Oobayashi, K. Oshima, H.  
48 Ozaki, K. Sasaki, R. Shindo, M. Shiraki, R. Sunagawa, S. Suzuki, Y. Takagi, K. Takano, K.  
49 Takashiba, Y. Takeshita, M. Tohaya, K. Tohyama, H. Tomori, H. Urata, N. Wake, S. Yamada, H.  
50 Yoshii.

# BMJ Open

## Antihypertensive drug effects according to the pretreatment self-measured home blood pressure: the HOMED-BP study

|                                 |                                                                                                                                                                                                                                                                                                                                                                                                                                                                                                                                                               |
|---------------------------------|---------------------------------------------------------------------------------------------------------------------------------------------------------------------------------------------------------------------------------------------------------------------------------------------------------------------------------------------------------------------------------------------------------------------------------------------------------------------------------------------------------------------------------------------------------------|
| Journal:                        | <i>BMJ Open</i>                                                                                                                                                                                                                                                                                                                                                                                                                                                                                                                                               |
| Manuscript ID                   | bmjopen-2020-040524.R1                                                                                                                                                                                                                                                                                                                                                                                                                                                                                                                                        |
| Article Type:                   | Original research                                                                                                                                                                                                                                                                                                                                                                                                                                                                                                                                             |
| Date Submitted by the Author:   | 28-Sep-2020                                                                                                                                                                                                                                                                                                                                                                                                                                                                                                                                                   |
| Complete List of Authors:       | Sano, Hikari; Showa Pharmaceutical University, Social Pharmacy and Public Health<br>Hara, Azusa; Keio University, Pharmacy<br>Asayama, Kei; KU Leuven, Studies Coordinating Centre, Laboratory of Hypertension ; Teikyo University, Hygiene and Public Health<br>Miyazaki, Seiko; Showa Pharmaceutical University, Social Pharmacy and Public Health<br>Kikuya, Masahiro; Teikyo University, Hygiene and Public Health<br>Imai, Yutaka ; Tohoku Institute for Management of Blood Pressure<br>Ohkubo, Takayoshi; Teikyo University, Hygiene and Public Health |
| <b>Primary Subject Heading</b>: | Cardiovascular medicine                                                                                                                                                                                                                                                                                                                                                                                                                                                                                                                                       |
| Secondary Subject Heading:      | Cardiovascular medicine                                                                                                                                                                                                                                                                                                                                                                                                                                                                                                                                       |
| Keywords:                       | Hypertension < CARDIOLOGY, Cardiology < INTERNAL MEDICINE, EPIDEMIOLOGY                                                                                                                                                                                                                                                                                                                                                                                                                                                                                       |
|                                 |                                                                                                                                                                                                                                                                                                                                                                                                                                                                                                                                                               |

SCHOLARONE™  
Manuscripts





I, the Submitting Author has the right to grant and does grant on behalf of all authors of the Work (as defined in the below author licence), an exclusive licence and/or a non-exclusive licence for contributions from authors who are: i) UK Crown employees; ii) where BMJ has agreed a CC-BY licence shall apply, and/or iii) in accordance with the terms applicable for US Federal Government officers or employees acting as part of their official duties; on a worldwide, perpetual, irrevocable, royalty-free basis to BMJ Publishing Group Ltd ("BMJ") its licensees and where the relevant Journal is co-owned by BMJ to the co-owners of the Journal, to publish the Work in this journal and any other BMJ products and to exploit all rights, as set out in our [licence](#).

The Submitting Author accepts and understands that any supply made under these terms is made by BMJ to the Submitting Author unless you are acting as an employee on behalf of your employer or a postgraduate student of an affiliated institution which is paying any applicable article publishing charge ("APC") for Open Access articles. Where the Submitting Author wishes to make the Work available on an Open Access basis (and intends to pay the relevant APC), the terms of reuse of such Open Access shall be governed by a Creative Commons licence – details of these licences and which [Creative Commons](#) licence will apply to this Work are set out in our licence referred to above.

Other than as permitted in any relevant BMJ Author's Self Archiving Policies, I confirm this Work has not been accepted for publication elsewhere, is not being considered for publication elsewhere and does not duplicate material already published. I confirm all authors consent to publication of this Work and authorise the granting of this licence.

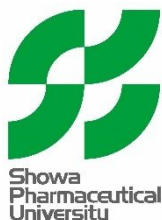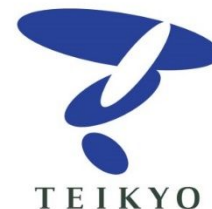

## Antihypertensive drug effects according to the pretreatment self-measured home blood pressure: the HOMED-BP study

Short title: Wilder's Law on Home Blood Pressure

Hikari Sano, Azusa Hara, Kei Asayama (0000-0003-3365-0547), Seiko Miyazaki,  
Masahiro Kikuya, Yutaka Imai, Takayoshi Ohkubo,  
on behalf of  
Hypertension Objective Treatment Based on Measurement  
by Electrical Devices of Blood Pressure (HOMED-BP) investigators

Department of Social Pharmacy and Public Health, Showa Pharmaceutical University, Machida, Japan (H.S., A.H., S.M.); Department of Pharmacy, Division of Drug Development and Regulatory Science, Keio University, Tokyo, Japan (A.H.); Department of Hygiene and Public Health, Teikyo University School of Medicine, Tokyo, Japan (K.A., M.K, T.O.); Tohoku Institute for Management of Blood Pressure, Sendai, Japan (K.A., T.O., Y.I.); KU Leuven Department of Cardiovascular Sciences, University of Leuven, Leuven, Belgium (K.A.).

Word counts: manuscript 6481, abstract 247

Tables 2, Figures 4

**Correspondence to:**

Kei Asayama, MD, PhD,  
Department of Hygiene and Public Health,  
Teikyo University School of Medicine,  
2-11-1 Kaga, Itabashi-ku,  
Tokyo 173-8605, Japan

Telephone: +81-3-3964-3615

Facsimile: +81-3-3964-1058

email: kei@asayama.org

## Abstract

**Objectives:** To clarify whether or not the antihypertensive drug effect is proportional to the baseline pretreatment self-measured home blood pressure (HBP) in accordance with the law of initial value (Wilder's law).

**Design:** A Post-hoc analysis of a multicentre clinical trial.

**Setting:** Outpatients across Japan with mild-to-moderate essential hypertension.

**Participants:** Among 3,518 randomised participants, 2,423 who self-measured HBP during the pretreatment drug-free period (10–28 days after starting fixed-dose antihypertensive monotherapy) with a mean 7.0 years' follow-up were eligible.

**Main outcome measures:** We analysed individual HBP readings during pretreatment and monotherapy.

**Results:** The day-to-day HBP during both the pretreatment period and monotherapy period remains almost the same throughout each period; the results were consistent, regardless of the pretreatment HBP. Following monotherapy, the reduction in the HBP increased by 2.2 mmHg (95% confidence interval [CI], 1.8–2.5) per 10-mmHg pretreatment HBP increase, up to 11.0 mmHg (CI, 9.9–12.0) among patients with an HBP  $\geq 165$  mmHg during pretreatment. Among the 1,005 patients receiving low-dose monotherapy (defined daily dose: 0.5 units), the reduction peaked at 8.9–9.1 mmHg in those with pretreatment HBP 155–164 and  $\geq 165$  mmHg ( $P=0.88$ ).

**Conclusions:** According to Wilder's law, the HBP reduction due to fixed-dose monotherapy was proportional to the pretreatment HBP without any regression to the mean phenomenon. With low-dose antihypertensive drugs, however, the HBP reduction peaked in patients with a high pretreatment HBP, indicating the need for such patients to receive a sufficient amount of antihypertensive drug medication at the initial treatment.

**Trial registration:** UMIN Clinical Trial Registry (<http://www.umin.ac.jp/ctr>), Unique identifier: C000000137.

1  
2  
3  
4 **Keywords:** blood pressure reduction, antihypertensive treatment, home blood pressure,  
5 self-measurement, Wilder's law, regression to the mean  
6  
7  
8  
9

## 10 **Article summary**

### 11 **Strengths and limitations of this study**

- 12 ● This is a post-hoc analysis of the Hypertension Objective Treatment based on  
13 Measurement by Electrical Device of Blood Pressure (HOMED-BP) study, which was  
14 a multicentre clinical trial with a prospective, randomised, open-label, blinded end  
15 point, evaluation (PROBE) design.  
16  
17 ● We enrolled 2,423 patients with mild-to-moderate essential hypertension.  
18  
19 ● Study patients measured their daily self-measurement of blood pressure at home  
20 during the pretreatment period, after antihypertensive monotherapy, and for a mean  
21 7.0 years' follow-up.  
22  
23 ● Home blood pressure was self-measured using a validated upper-arm cuff-  
24 oscillometric OMRON HEM 7471C-N device, in which all measured data, including  
25 the measurement time, were automatically recorded.  
26  
27 ● We were unable to assess the placebo effect because all patients received  
28 antihypertensive medication.  
29  
30  
31  
32  
33  
34  
35  
36  
37  
38  
39  
40  
41  
42  
43  
44  
45  
46  
47  
48  
49  
50  
51  
52  
53  
54  
55  
56  
57  
58  
59  
60

## Introduction

Hypertension is a major risk factor for cardiovascular disease.<sup>1 2</sup> A meta-analysis showed that a 10/5 mmHg reduction in conventional office systolic/diastolic blood pressure reduces the stroke risk by approximately 40% and the coronary artery disease risk by approximately 20%.<sup>3</sup> However, office blood pressure has major limitations including being affected by the white-coat phenomenon, i.e. a warning response wherein the office blood pressure unexpectedly rises when in an examination room in front of medical staff.<sup>4</sup> In contrast, self-measured home blood pressure assessed using automated devices in a non-medical setting can obtain a plurality of readings over a long period under relatively uniform conditions, resulting in highly reproducible values without observer bias when patients apply a standardised protocol.<sup>2 4 5</sup> Home monitoring is unaffected by the white-coat phenomenon and is suitable for the evaluation of drug efficacy.<sup>2 5 6</sup> Given its greater prognostic ability for cardiovascular complications than office blood pressure,<sup>1 2 7-9</sup> home blood pressure-based antihypertensive treatment is highly recommended.<sup>2 9</sup>

Recent studies<sup>10 11</sup> have reported that the higher the pretreatment blood pressure, the greater the reduction in the blood pressure by antihypertensive drug treatment, according to the law of initial value (Wilder's law<sup>12</sup>). However, the reduction in the 24-h ambulatory blood pressure corresponding to the pretreatment office blood pressure was shown to be relatively small.<sup>10</sup> Such disproportionality can be attributed to changes in the white-coat effect, which depends on pretreatment office blood pressure.<sup>10</sup> Although ambulatory and home blood pressures are both categorised as out-of-office blood pressure, the characteristics and usefulness of home blood pressure differ from those of ambulatory recordings,<sup>1 2 9</sup> and no report has described differences in antihypertensive drug effects according to the pretreatment blood pressure.

We therefore investigated the association between the pretreatment home and office blood pressures levels and home blood pressure reduction by antihypertensive

1  
2  
3  
4 monotherapy as well as long-term blood pressure changes in patients participating in a  
5  
6 home blood pressure-based clinical trial.  
7  
8  
9

## 10 **Methods**

### 11 **Study design**

12  
13 This was a post-hoc analysis of the Hypertension Objective Treatment based on  
14  
15 Measurement by Electrical Device of Blood Pressure (HOMED-BP) study<sup>13-15</sup>, which was  
16  
17 a multicentre clinical trial with a prospective, randomised, open-label, blinded end point,  
18  
19 evaluation (PROBE)<sup>16</sup> design. The HOMED-BP protocol complies with the Declaration of  
20  
21 Helsinki with respect to the ethical principles for medical research involving human  
22  
23 subjects<sup>17</sup> and is registered with the UMIN Clinical Trial Registry, number C000000137  
24  
25 (<http://www.umin.ac.jp/ctr>). The institutional review board of the Teikyo University School  
26  
27 of Medicine approved the study (17-044-2), and all study participants gave their written  
28  
29 informed consent.  
30  
31  
32

33  
34 We included patients with mild-to-moderate essential hypertension based on home  
35  
36 blood pressure (135–179/85–119 mmHg) with a minimum age of 40 years old. The  
37  
38 exclusion criteria were severe hypertension (home blood pressure  $\geq 180/\geq 120$  mmHg or  
39  
40 office blood pressure  $\geq 220/\geq 125$  mmHg), meeting the systolic criteria for the home blood  
41  
42 pressure ( $\geq 135$  mmHg) but with a diastolic home blood pressure of  $< 65$  mmHg, meeting  
43  
44 the diastolic home blood pressure criteria ( $\geq 85$  mmHg) but with a systolic home blood  
45  
46 pressure of  $< 110$  mmHg, or contraindications to either calcium channel blockers,  
47  
48 angiotensin -converting enzyme inhibitors, or angiotensin receptor blockers.  
49

### 50 **Selection of patients**

51  
52 After the first visit at the initial registration, the 5,211 enrolled patients were followed-up  
53  
54 for at least two weeks without any antihypertensive drugs. At the second visit, the 3,518  
55  
56 (67.5%) eligible patients were randomised in a 2 × 3 design to receive monotherapy with  
57  
58 the first-line drug (calcium channel blockers, angiotensin-converting enzyme inhibitors, or  
59  
60

1  
2  
3  
4 angiotensin receptor blockers) with target home blood pressure-based antihypertensive  
5 values (usual control, ranging from 125 to 134 mmHg systolic and 80 to 84 mmHg  
6 diastolic; tight control, <125 mmHg systolic and <80 mmHg diastolic). The reasons for  
7 excluding the other 1,693 patients before randomisation have been described  
8 elsewhere<sup>14</sup> and listed in Supplemental Figure 1.  
9  
10  
11  
12  
13

14  
15 In the present analysis, we excluded 1,095 of the randomised 3,518 patients because  
16 they had obtained <3 home readings at baseline (pretreatment period;  $n=102$ ) or during  
17 fixed-dose monotherapy with the first-line drug ( $n=592$ ), they had isolated diastolic  
18 hypertension (home blood pressure  $\leq 135/\geq 85$  mmHg;  $n=143$ ), they did not actually  
19 receive an antihypertensive drug or had been treated with  $\geq 2$  drug classes simultaneously  
20 ( $n=37$ ), or we were unable to assess the blood pressure or treatment status during follow-  
21 up ( $n=221$ ). A total of 2,423 participants were analysed statistically (Supplemental Figure  
22 1). Based on our previous report indicating that the risks of cardiovascular outcomes  
23 were similar in the randomised groups (tight vs. usual blood pressure control, and a  
24 comparison of drug classes to initiate treatment) because of the small blood pressure  
25 difference between the groups,<sup>14</sup> we combined all 2,423 participants in the present  
26 analysis.  
27  
28  
29  
30  
31  
32  
33  
34  
35  
36  
37  
38  
39

#### 40 **Measurements of blood pressure**

41  
42 Patients enrolled in HOMED-BP received spoken and written instructions on blood  
43 pressure self-measurement and the utilisation of a validated cuff-oscillometric OMRON  
44 HEM 7471C-N (Omron Healthcare Co., Ltd., Kyoto, Japan),<sup>18</sup> in which all measured data,  
45 including the measurement time, are automatically recorded. The standard upper-arm  
46 cuff, which covered 22–32 cm of a patient's arm circumference, was attached to the  
47 device. The importance of using an appropriately sized cuff was noted in the user's  
48 manual of the device, and we provided another cuff upon request. Throughout the study  
49 period, patients were asked to self-measure their blood pressure at home once every  
50  
51  
52  
53  
54  
55  
56  
57  
58  
59  
60

1  
2  
3  
4 morning within one hour of awakening, after urination, before breakfast, before taking  
5 antihypertensive medication, and after two minutes' rest in a sitting position.  
6  
7

8 Office blood pressure was measured by doctors in the outpatient clinic using a  
9 validated cuff-oscillometric OMRON HEM-907 (Omron Healthcare Co., Ltd., Kyoto,  
10 Japan).<sup>19</sup> At each visit, the office blood pressure was measured twice consecutively in a  
11 sitting position after at least two minutes' rest.  
12  
13  
14  
15

### 16 **The evaluation of the blood pressure**

17  
18 In this study, the baseline pretreatment home blood pressure was the average of all blood  
19 pressure measurements taken for five days before the second visit on randomisation, and  
20 the blood pressure during the monotherapy was the average of measurements taken for  
21 five days within the 10- to 28-day period after the initiation of randomised first-line drugs  
22 (Figure 1).<sup>20</sup> We used this time window for home readings because (1) the home blood  
23 pressure used for determining eligibility and treatment adjustments at every visit in the  
24 HOMED-BP study was the average of the home readings available over 5 days  
25 immediately preceding the visit,<sup>14</sup> (2) the clinical investigators followed the patients at  
26 intervals of approximately 2 to 4 weeks in general practice and approximately 4 to 8  
27 weeks at hospital outpatient clinics, and (3) the time interval needed to receive sufficient  
28 antihypertensive effects is reported to be approximately 7 to 23 days.<sup>21</sup> All of the home  
29 blood pressure values evaluated in the present study were therefore captured before the  
30 third visit, when drug titration might have been performed. The home blood pressure at  
31 the end of follow-up (mean follow-up period, 7.0 years; interquartile range, 5.1–9.1 years)  
32 was defined as the average of the last available five days of home blood pressure values.  
33 The office blood pressure during pretreatment and follow-up were the averages of the two  
34 consecutive measurements at each visit. The reduction in the blood pressure was  
35 calculated as the change from the pretreatment blood pressure at baseline.  
36  
37  
38  
39  
40  
41  
42  
43  
44  
45  
46  
47  
48  
49  
50  
51  
52  
53  
54  
55  
56  
57  
58  
59  
60



## Definition of comorbidity and quantification of drugs

The body mass index was calculated as the body weight in kilograms divided by the height in meters squared. Diabetes mellitus was defined as a fasting plasma glucose level of  $\geq 7.0$  mmol/L ( $\geq 126$  mg/dL), HbA1c of  $\geq 6.5\%$ , or treatment with oral antidiabetic drugs or insulin. Hypercholesterolemia was defined as a total serum cholesterol level of  $\geq 5.69$  mmol/L ( $\geq 220$  mg/dL), a history of hypercholesterolemia, or taking lipid-lowering drugs.<sup>14 20</sup>

We used the World Health Organization's defined daily dose (DDD) to quantify the use of antihypertensive drugs<sup>22</sup>; the DDD is the standard maintenance dose per day for a drug used for its main indication in adults.<sup>22</sup> The standard usage per day is defined as a DDD of 1 unit.

## Statistical analyses

For database management and statistical analyses, we used the SAS software package, version 9.4 (SAS Institute Inc., Cary, NC, USA). Statistical significance was set at an  $\alpha < 0.05$  on 2-sided tests. We focused on our analyses based on systolic blood pressure, as systolic pressure is the overriding risk factor in middle-aged and older people.<sup>23</sup>

Patients were divided into 4 groups ( $\leq 145$ , 145–154, 155–164, and  $\geq 165$  mmHg) according to the baseline pretreatment systolic home blood pressure, and the blood pressure reduction was compared among the groups. For office blood pressure assessments, patients were stratified into 10 -mmHg groups according to the pretreatment systolic office blood pressure, as in the report by Schmieder et al.<sup>10</sup> The chi-square test and an analysis of variance (ANOVA) were used to compare the baseline characteristics between groups appropriately. Home blood pressure values during the five pretreatment days as well as those during the five monotherapy days were compared by a repeated measure mixed linear model, as implemented in the PROC MIXED procedure of the SAS package with the residual maximum likelihood option as the estimation method for the covariance parameters and the Kenward and Roger

1  
2  
3  
4 approximation<sup>24</sup> for the degrees of freedom calculations. The blood pressure reduction  
5 was compared among groups according to the pretreatment blood pressure using an  
6 analysis of covariance (ANCOVA), and the change in the blood pressure reduction per  
7 pretreatment blood pressure increase was calculated using a linear regression model. In  
8 both analyses, the sex, age, body mass index, current smoking and drinking habit,  
9 hypercholesterolemia, diabetes mellitus, and history of cardiovascular disease were used  
10 for adjustments. The DDD during the initial antihypertensive monotherapy and at the end  
11 of follow-up were further used as the adjustment factors to compare the pressure  
12 reduction from pretreatment to the initial treatment and to the end of follow-up,  
13 respectively. For the 40 patients without body mass index data, we interpolated the value  
14 based on the sex and age (continuous). The white-coat effect was defined as the office  
15 blood pressure minus the home blood pressure as a continuous variable (negative value  
16 if the home blood pressure was higher than the office blood pressure)<sup>10 25 26</sup>, and changes  
17 in the white-coat effect were determined by subtracting the effect observed at the end of  
18 the follow-up period from the effect captured during pretreatment.

### 35 **Patient and public involvement**

36 No patients were involved in setting the research question or the outcome measures, nor  
37 were they involved in developing the plans for recruitment, design, or implementation of  
38 the study. No patients were asked to advise on the interpretation or writing up of the  
39 results. There are no specific plans to disseminate the results of the research to study  
40 participants or the relevant patient community beyond the usual channels of publication.  
41  
42  
43  
44  
45  
46  
47  
48  
49

## 50 **Results**

### 51 **Representativeness of the study patients**

52 Supplemental Table 1 shows the baseline characteristics of the 2,423 patients included in  
53 the present analysis, along with the other 1,095 randomised patients excluded from the  
54 analysis and the 694 patients who were randomized but not included because they  
55  
56  
57  
58  
59  
60

1  
2  
3  
4 measured their home blood pressure <3 times. Although statistically significant  
5  
6 differences were found in the age ( $P\leq 0.030$ ), systolic blood pressure ( $P\leq 0.0064$ ) for the  
7  
8 comparison between analysed patients and all excluded patients, and in the drinking  
9  
10 habit and history of cardiovascular disease ( $P\leq 0.020$ ) for the comparison between  
11  
12 analysed patients and patients who were excluded due to an insufficient number of home  
13  
14 blood pressure measurements, all other characteristics were similar.

### 17 **Patients' characteristics**

18  
19 Table 1 shows the baseline characteristics of 2,423 patients. The average age of all  
20  
21 participants was 60.0 (standard deviation, 9.8) years old, and the proportion of women  
22  
23 was 51.0%. The Age, body mass index, smoking habit, and office blood pressure were  
24  
25 significantly and positively associated with the baseline systolic blood pressure category.  
26  
27 As shown in Table 2, the day-to-day home blood pressure measurements during both the  
28  
29 pretreatment period and monotherapy period remains almost the same throughout each  
30  
31 period. When patients were subdivided by the systolic home blood pressure at baseline,  
32  
33 there were significant differences between the patients with a home blood pressure <145  
34  
35 mmHg during the pretreatment period ( $P=0.032$ ) and 145–154 mmHg during the  
36  
37 monotherapy period ( $P=0.035$ ); however, the differences between adjacent days were not  
38  
39 significant even among those patients ( $P\geq 0.12$ ).

40  
41  
42  
43 The Relationship of the white-coat effect and office or home blood pressure values during  
44  
45 the pretreatment period as a cross-sectional approach is shown in Supplemental Figure  
46  
47 2. The white-coat effect increased along with the office blood pressure (7.5 mmHg [95%  
48  
49 confidence limit, 7.3–7.8 mmHg] per 10-mmHg increment), whereas the home blood  
50  
51 pressure was negatively related to the white-coat effect (-4.5 mmHg [95% confidence  
52  
53 limit, -3.9 to -5.0 mmHg] per 10-mmHg home blood pressure increment).

### **Reduction in the home blood pressure by monotherapy according to the pretreatment blood pressure**

During the initial fixed-dose monotherapy, the reduction in the systolic home blood pressure was increased by 2.2 mmHg (95% confidence interval [CI], 1.8–2.5 mmHg) per 10-mmHg pretreatment home blood pressure increase. The reductions in each baseline pretreatment blood pressure group are shown in Figure 2. The slope of the home blood pressure reduction accompanying the increase in the pretreatment office blood pressure was shallower, increasing by 0.6 mmHg (95% CI, 0.4–0.9 mmHg) per 10-mmHg pretreatment office blood pressure increase.

### **Stratification by the DDD**

Figure 3 demonstrates the results according to the DDD of the initial antihypertensive drugs. Among 1,005 patients who started monotherapy with antihypertensive drugs of 1 unit DDD, the pretreatment home blood pressure was linearly associated with the blood pressure reduction at the time of monotherapy; the enhancement of the home blood pressure reduction for each increase in the pretreatment home blood pressure category was 2.6 mmHg (95% CI, 1.9–3.2 mmHg). However, among those receiving 0.5 units DDD ( $n=1,005$ ; occasionally the same number), significant enhancement in home blood pressure reductions was observed up to the 155–164 mmHg group (per 1 group increase, 2.1 mmHg; 95% CI, 1.2–2.9 mmHg), where it peaked; the reductions in the home blood pressure among patients with a pretreatment home blood pressure of 155–164 mmHg and  $\geq 165$  mmHg were 8.9 and 9.1 mmHg, respectively ( $P=0.88$ ). The results were confirmed when we divided the whole 2,423 patients according to a DDD of  $<1$  or  $\geq 1$  unit, as shown in Supplemental Figure 3.

### **Reduction in the follow-up blood pressure according to the pretreatment blood pressure**

According to the previous report based on ambulatory blood pressure monitoring,<sup>10</sup> we compared the home and office blood pressure reductions at the end of follow-up

1  
2  
3  
4 according to the baseline pretreatment office blood pressure. After 7.0 years' follow-up  
5  
6 with a mean DDD of 1.8 units (median 1.5; interquartile range, 1.0–2.5), the reduction in  
7  
8 the office blood pressure was linearly associated with the office blood pressure during  
9  
10 pretreatment (reduction in the home pressure from the office blood pressure category  
11  
12 <140 to ≥180 mmHg: 7.5 to 50.7 mmHg; Figure 4). Furthermore, similar to the previous  
13  
14 report based on ambulatory monitoring<sup>10</sup>, the reduction in the home blood pressure was  
15  
16 linearly associated with the office blood pressure during the pretreatment period;  
17  
18 however, the degree of home blood pressure reduction per the pretreatment office blood  
19  
20 pressure increase was weak (reduction in home pressure: 18.6 to 30.7 mmHg). Finally,  
21  
22 changes in the white-coat effect during the follow-up period increased significantly as the  
23  
24 pretreatment office blood pressure increased (Supplemental Figure 4; category increment  
25  
26  $P<0.0001$ ).

## 31 Discussion

32  
33 The antihypertensive drug effect depends on the pretreatment blood pressure. In line  
34  
35 with Wilder's law,<sup>12</sup> the home blood pressure reduction after the initial drug treatment was  
36  
37 proportional to the baseline pretreatment home blood pressure in the present study. The  
38  
39 current findings emphasize the need to assess the home blood pressure before treatment  
40  
41 when evaluating and initiating antihypertensive drug therapy.

42  
43  
44 Wilder indicated that the direction of the body function response depends to a large  
45  
46 extent on the initial level of that function, regardless of the agent.<sup>12</sup> Wilder's law predicts  
47  
48 that in the most severe hypertensive patients, the decrease in blood pressure will be  
49  
50 greater with the same medication than in those with less-severe hypertension. The  
51  
52 statistical phenomenon of regression to the mean (regression toward the mean) is  
53  
54 another major confounding factor hampering the accurate assessment of the effect of  
55  
56 antihypertensive agents.<sup>27</sup> However, as shown in Table 2, there were no regression  
57  
58 trends in the home blood pressure values from the first to the final measurement during  
59  
60

1  
2  
3  
4 the pretreatment or monotherapy periods, regardless of the pretreatment home blood  
5 pressure. This finding indicates the strength of the self-measurement of home blood  
6 pressure, as home measurement is associated with minimal (if any during an initial few  
7 days after the measurement begins<sup>28</sup>) regression to the mean.<sup>5 6 29</sup> Based on ambulatory  
8 blood pressure monitoring, regression to the mean was observed consistently among the  
9 five studies<sup>30</sup>, and a portion of the reduction in blood pressure after initiating  
10 antihypertensive treatment can be explained by this phenomenon<sup>30</sup>. However, there have  
11 been no reports investigating the biological mechanism contributing to this reduced  
12 influence of the regression to the mean phenomenon on self-measured home blood  
13 pressure. Nevertheless, home blood pressure measurement is likely to be useful for  
14 estimating the efficacy of antihypertensive drugs.

15  
16  
17  
18  
19  
20  
21  
22  
23  
24  
25  
26  
27  
28  
29  
30  
31  
32  
33  
34  
35  
36  
37  
38  
39  
40  
41  
42  
43  
44  
45  
46  
47  
48  
49  
50  
51  
52  
53  
54  
55  
56  
57  
58  
59  
60

Schmieder et al<sup>10</sup>. reported that the higher the baseline office blood pressure, the greater the blood pressure reduction after one year of treatment enhancement, and this was more obvious in the office blood pressure than in the ambulatory blood pressure.<sup>10</sup> A recent meta-analysis also showed that the overall treatment-induced reduction was greater for office blood pressure than for 24-h ambulatory blood pressure.<sup>11</sup> In the present study, the reduction in the office blood pressure at the end of a mean 7.0 years' follow-up was also greater than that in the self-measured home blood pressure (Figure 4). Schmieder et al<sup>10</sup>. attributed this discrepancy to the changes in the white-coat effect, i.e. the higher the baseline office blood pressure, the greater the decrease in the white-coat effect due to antihypertensive treatment. This assumption was also supported by the findings of the present study (Supplemental Figure 4); however, the white-coat effect may not be a main driver for the discrepancy because the home blood pressure reduction also followed Wilder's law despite the negative correlation between home blood pressure and white-coat effect during the pretreatment period. Nevertheless, the out-of-office blood pressure is theoretically free from the white-coat phenomenon,<sup>4</sup> and the reduction in the office blood pressure by antihypertensive treatment partially includes a reduction in the

1  
2  
3  
4 white-coat effect as well. We should therefore follow-up out-of-office-measured blood  
5  
6 pressure carefully, since patients with a higher blood pressure tend to show a greater  
7  
8 antihypertensive effect when their values are based on office-based measurements, while  
9  
10 their out-of-office blood pressure reduction might be insufficient, resulting in a persistent  
11  
12 high risk for cardiovascular complications.

13  
14  
15 Among 1,005 patients who were taking low-dose antihypertensive drugs, namely at a  
16  
17 DDD of 0.5 units, the reduction in home blood pressure during monotherapy in the group  
18  
19 with a pretreatment home blood pressure of  $\geq 165$  mmHg was almost identical to that in  
20  
21 the group with a pretreatment home blood pressure of 155–164 mmHg. A high home  
22  
23 blood pressure is associated with a high cardiovascular disease risk over the long term,  
24  
25 both before and during antihypertensive therapy.<sup>14 15</sup> Inadequate control of office blood  
26  
27 pressure with antihypertensive drug therapy remains a critical issue in Japan<sup>31</sup> as well as  
28  
29 in Europe<sup>32</sup> and the United States<sup>33</sup>. Previous studies<sup>34 35</sup> have shown the importance of  
30  
31 rapid blood pressure control, and the current findings suggest that a sufficient dosage of  
32  
33 antihypertensive drug from the beginning of treatment is necessary, particularly among  
34  
35 those with a high home blood pressure before starting treatment.

36  
37  
38 Although the need to strengthen antihypertensive drug treatment has been gradually  
39  
40 accepted,<sup>1 2 9</sup> various factors associated with medical providers, patients, and healthcare  
41  
42 systems have contributed to clinical inertia (non-compliance).<sup>36 37</sup> Clinical inertia is  
43  
44 associated with inadequate blood pressure control, resulting in the increased risk of  
45  
46 adverse cardiovascular effects. Medical services should help overcome clinical inertia as  
47  
48 well as other hindrances in order to improve the blood pressure control of patients. Self-  
49  
50 measurement of home blood pressure is expected to ameliorate the status quo because  
51  
52 it promotes an improved awareness among patients with high blood pressure, helping  
53  
54 them adhere to antihypertensive lifestyle modifications and drug treatments.<sup>5</sup>

55  
56  
57 Our current study must be interpreted within the context of several potential limitations.  
58  
59 First, because the patients in HOMED-BP received home blood pressure-guided  
60

1  
2  
3  
4 therapy,<sup>14</sup> their treatment was adjusted according to the self-measured home blood  
5  
6 pressure, and the office blood pressure was used as complimentary information. Second,  
7  
8 we excluded 1,095 (31.1%) of the randomised HOMED-BP patients, including 694 due to  
9  
10 an insufficient number of home readings. According to Supplemental Table 1, there is  
11  
12 likely little concern about the effect of exclusion on the balance between groups; however,  
13  
14 this lack of an effect cannot be fully guaranteed, thus we should practice caution when  
15  
16 applying the findings regarding antihypertensive drug effect to real-world clinical practice.  
17  
18 Third, we were unable to assess the placebo effect in the present study because all  
19  
20 patients received antihypertensive medication. The placebo effect is a major influencing  
21  
22 factor, in addition to Wilder's law and the regression to the mean phenomenon, in the  
23  
24 administration of antihypertensive medication.<sup>27</sup> Fourth, because office blood pressure  
25  
26 was measured less than 3 times at each visit, the regression to the mean on office blood  
27  
28 pressure cannot be assessed or compared with that on home blood pressure. Finally,  
29  
30 although our results are representative of middle- to old-aged Japanese patients, they  
31  
32 might not be applicable to other settings or ethnic groups with different distributions of risk  
33  
34 factors.  
35  
36

37  
38 In conclusion, the reduction in the home blood pressure by antihypertensive drug  
39  
40 monotherapy was proportional to the home blood pressure during the pretreatment drug-  
41  
42 free period, in accordance with Wilder's law.<sup>12</sup> However, the home blood pressure  
43  
44 reduction peaked in the patients who had a high pretreatment home blood pressure ( $\geq 155$   
45  
46 mmHg) when treatment was initiated with low-dose antihypertensive drugs. Patients with  
47  
48 a systolic home blood pressure of  $\geq 155$  mmHg before treatment might be considered to  
49  
50 have resistant hypertension because the effect of low-dose antihypertensive drug for the  
51  
52 blood pressure reduction reached the plateau, which seems against Wilder's law;  
53  
54 however, we cannot say too much about the issue because we enrolled patients with  
55  
56 mild-to-moderate essential hypertension in the HOMED-BP study, and those with severe  
57  
58 hypertension that tended to be resistant were not enrolled. Whether or not Wilder's law  
59  
60



1  
2  
3  
4 can be similarly applied to high -risk patients with severe hypertension remains unclear.  
5  
6 However, home blood pressure measurement was minimally affected by regression to the  
7  
8 mean, suggesting the usefulness of home blood pressure measurement for estimating  
9  
10 the efficacy of antihypertensive drugs. Patients with a high home blood pressure during  
11  
12 pretreatment should receive a sufficient amount of antihypertensive medication starting  
13  
14 from the very first treatment.  
15  
16  
17  
18

### 19 **Acknowledgements**

20 We would like to express our deepest appreciation to all of the HOMED-BP study  
21  
22 collaborators for their valuable contribution. We thank the staff of Teikyo University for  
23  
24 their valuable help.  
25  
26

### 27 **Contributors**

28  
29 KA, YI, and TO conceived of and designed the study; AH, KA, MK, and YI acquired the  
30  
31 data; and KA and HS carried out the statistical analyses. HS drafted the original  
32  
33 manuscript with KA and AH. SM, YI, and TO provided the intellectual input, and all  
34  
35 authors critically revised the manuscript and approved the final manuscript. KA is the  
36  
37 guarantor.  
38  
39

### 40 **Funding**

41  
42 This study was funded by grants from the Japan Cardiovascular Research Foundation,  
43  
44 the Japan Arteriosclerosis Prevention Fund, and Tohoku University. Fujitsu Systems  
45  
46 East Limited (Tokyo, Japan) and Omron Healthcare Co., Ltd. (Kyoto, Japan) developed  
47  
48 and maintained the Internet-based infrastructure for the measurement of the blood  
49  
50 pressure at home and the management of patients. This study was also supported by  
51  
52 Grants-in-Aid for Scientific Research (23390171, 25253059, 26860093, 16K15359,  
53  
54 17H04126, and 18K06759) from the Ministry of Education, Culture, Sports, Science and  
55  
56 Technology, Japan, and Grants-in-Aid for the Japanese Society for the Promotion of  
57  
58 Science (JSPS) fellows (25.7756 and 25.9328). No funding agencies had any role in the  
59  
60

1  
2  
3  
4 design or conduct of the study; in the collection, analysis, or interpretation of the data; or  
5  
6 in the preparation, review, or approval of the manuscript.  
7

### 8 **Competing interests**

9  
10 All authors have completed the ICMJE uniform disclosure form at  
11  
12 [www.icmje.org/coi\\_disclosure.pdf](http://www.icmje.org/coi_disclosure.pdf) and declare no support from any organisation for the  
13  
14 submitted work; KA, YI, and TO received research grants from Omron Healthcare. No  
15  
16 other relationships or activities appear to have influenced the submitted work.  
17

### 18 **Ethical approval**

19 Fully disclosed in the Study design section.  
20  
21

### 22 **Data sharing**

23 No additional data are available.  
24  
25

### 26 **Statements**

27  
28 The Corresponding Author (KA) has the right to and does grant on behalf of all authors  
29  
30 an exclusive licence on a worldwide basis to the BMJ Publishing Group, Ltd., for this  
31  
32 article (if accepted) to be published in BMJ editions and any other BMJ PGL products and  
33  
34 sublicenses such use and exploit of all subsidiary rights, as set out in our licence.  
35  
36

37  
38 The manuscript's guarantor (KA) affirms that the manuscript is an honest, accurate, and  
39  
40 transparent account of the study being reported; that no important aspects of the study  
41  
42 have been omitted; and that any discrepancies from the study as originally planned (and,  
43  
44 if relevant, registered) have been explained.  
45

### 46 **Dissemination declaration**

47  
48 Dissemination of the results to study participants is not possible.  
49  
50  
51  
52  
53  
54  
55  
56  
57  
58  
59  
60

## References

1. Williams B, Mancia G, Spiering W, et al. 2018 ESC/ESH Guidelines for the management of arterial hypertension. *Eur Heart J*. 2018;39(33):3021-104.
2. Umemura S, Arima H, Arima S, et al. The Japanese Society of Hypertension Guidelines for the Management of Hypertension (JSH 2019). *Hypertens Res*. 2019;42(9):1235-481.
3. Law MR, Morris JK, Wald NJ. Use of blood pressure lowering drugs in the prevention of cardiovascular disease: meta-analysis of 147 randomised trials in the context of expectations from prospective epidemiological studies. *BMJ*. 2009;338:b1665.
4. Asayama K, Li Y, Franklin SS, et al. Cardiovascular risk associated with white-coat hypertension: con side of the argument. *Hypertension*. 2017;70(4):676-82.
5. Imai Y, Hosaka M, Elnagar N, et al. Clinical significance of home blood pressure measurements for the prevention and management of high blood pressure. *Clin Exp Pharmacol Physiol*. 2014;41(1):37-45.
6. Imai Y, Ohkubo T, Hozawa A, et al. Usefulness of home blood pressure measurements in assessing the effect of treatment in a single-blind placebo-controlled open trial. *J Hypertens*. 2001;19(2):179-85.
7. Ohkubo T, Imai Y, Tsuji I, et al. Home blood pressure measurement has a stronger predictive power for mortality than does screening blood pressure measurement: a population-based observation in Ohasama, Japan. *J Hypertens*. 1998;16(7):971-75.
8. Asayama K, Ohkubo T, Kikuya M, et al. Prediction of stroke by self-measurement of blood pressure at home versus casual screening blood pressure measurement in relation to the JNC-7 classification: the Ohasama study. *Stroke*. 2004;35(10):2356-61.
9. Whelton PK, Carey RM, Aronow WS, et al. 2017 ACC/AHA/AAPA/ABC/ACPM/AGS/APhA/ASH/ASPC/NMA/PCNA Guideline for

- 1  
2  
3  
4 the Prevention, Detection, Evaluation, and Management of High Blood Pressure in  
5  
6 Adults: A Report of the American College of Cardiology/American Heart  
7  
8 Association Task Force on Clinical Practice Guidelines. *Hypertension*.  
9  
10 2018;71(6):e13-e115.  
11  
12 10. Schmieder RE, Schmidt ST, Riemer T, et al. Disproportional decrease in office blood  
13  
14 pressure compared with 24-hour ambulatory blood pressure with antihypertensive  
15  
16 treatment: dependency on pretreatment blood pressure levels. *Hypertension*.  
17  
18 2014;64(5):1067-72.  
19  
20 11. Soranna D, Zambon A, Corrao G, et al. Different effects of antihypertensive treatment  
21  
22 on office and ambulatory blood pressure: a meta-analysis. *J Hypertens*.  
23  
24 2019;37(3):467-75.  
25  
26 12. Wilder J. Basimetric approach (law of initial value) to biological rhythms. *Ann N Y*  
27  
28 *Acad Sci*. 1962;98:1211-20.  
29  
30 13. Fujiwara T, Nishimura T, Ohkuko T, et al. Rationale and design of HOMED-BP Study:  
31  
32 hypertension objective treatment based on measurement by electrical devices of  
33  
34 blood pressure study. *Blood Press Monit*. 2002;7(1):77-82.  
35  
36 14. Asayama K, Ohkubo T, Metoki H, et al. Cardiovascular outcomes in the first trial of  
37  
38 antihypertensive therapy guided by self-measured home blood pressure.  
39  
40 *Hypertens Res*. 2012;35(11):1102-10.  
41  
42 15. Watabe D, Asayama K, Hanazawa T, et al. Predictive power of home blood pressure  
43  
44 indices at baseline and during follow-up in hypertensive patients: HOMED-BP  
45  
46 study. *Hypertens Res*. 2018;41(8):622-28.  
47  
48 16. Hansson L, Hedner T, Dahlof B. Prospective randomized open blinded end-point  
49  
50 (PROBE) study. A novel design for intervention trials. Prospective Randomized  
51  
52 Open Blinded End-Point. *Blood Press*. 1992;1(2):113-9.  
53  
54  
55  
56  
57  
58  
59  
60

- 1  
2  
3  
4 17. World Medical Association. World Medical Association Declaration of Helsinki: ethical  
5  
6 principles for medical research involving human subjects. *JAMA*.  
7  
8 2013;310(20):2191-4.  
9
- 10 18. Chonan K, Kikuya M, Araki T, et al. Device for the self-measurement of blood  
11  
12 pressure that can monitor blood pressure during sleep. *Blood Press Monit*.  
13  
14 2001;6(4):203-05.  
15
- 16 19. White WB, Anwar YA. Evaluation of the overall efficacy of the Omron office digital  
17  
18 blood pressure HEM-907 monitor in adults. *Blood Press Monit*. 2001;6(2):107-10.  
19
- 20 20. Asayama K, Ohkubo T, Hanazawa T, et al. Does antihypertensive drug class affect  
21  
22 day-to-day variability of self-measured home blood pressure? the HOMED-BP  
23  
24 study. *J Am Heart Assoc*. 2016;5(3):e002995.  
25
- 26 21. Satoh M, Haga T, Hosaka M, et al. The velocity of antihypertensive effects of seven  
27  
28 angiotensin II receptor blockers determined by home blood pressure  
29  
30 measurements. *J Hypertens*. 2016;34(6):1218-23.  
31
- 32 22. World Health Organization. World Health Organization Collaborating Centre for Drug  
33  
34 Statistics Methodology System of Defined Daily Doses. 2018 [updated September  
35  
36 14, 2018. Available from: [http://www.whocc.no/atc\\_ddd\\_index/](http://www.whocc.no/atc_ddd_index/) accessed  
37  
38 September 14, 2018.  
39
- 40 23. Staessen J, Amery A, Fagard R. Isolated systolic hypertension in the elderly. *J*  
41  
42 *Hypertens*. 1990;8(5):393-405.  
43
- 44 24. Kenward MG, Roger JH. Small sample inference for fixed effects from restricted  
45  
46 maximum likelihood. *Biometrics*. 1997;53(3):983-97.  
47
- 48 25. Asayama K, Ohkubo T, Rakugi H, et al. Comparison of blood pressure values-self-  
49  
50 measured at home, measured at an unattended office, and measured at a  
51  
52 conventional attended office. *Hypertens Res*. 2019;42(11):1726-37.  
53  
54  
55  
56  
57  
58  
59  
60

- 1  
2  
3  
4 26. Ogata S, Kamide K, Asayama K, et al. Genome-wide association study for white coat  
5  
6 effect in Japanese middle-aged to elderly people: The HOMED-BP study. *Clin Exp*  
7  
8 *Hypertens*. 2018;40(4):363-69.  
9
- 10 27. Messerli FH, Rexhaj E. Of headwind and tailwind, regression to the mean and  
11  
12 Wilder's principle. *J Hypertens*. 2019;37(1):4-5.  
13
- 14 28. Ohkubo T, Asayama K, Kikuya M, et al. How many times should blood pressure be  
15  
16 measured at home for better prediction of stroke risk? Ten-year follow-up results  
17  
18 from the Ohasama study. *J Hypertens*. 2004;22(6):1099-104.  
19
- 20 29. Vaur L, Dubroca II, Dutrey-Dupagne C, et al. Superiority of home blood pressure  
21  
22 measurements over office measurements for testing antihypertensive drugs.  
23  
24 *Blood Press Monit*. 1998;3(2):107-14.  
25
- 26 30. Moore MN, Atkins ER, Salam A, et al. Regression to the mean of repeated  
27  
28 ambulatory blood pressure monitoring in five studies. *J Hypertens*. 2019;37(1):24-  
29  
30 29.  
31  
32
- 33 31. Asayama K, Hozawa A, Taguri M, et al. Blood pressure, heart rate, and double  
34  
35 product in a pooled cohort: the Japan Arteriosclerosis Longitudinal Study. *J*  
36  
37 *Hypertens*. 2017;35(9):1808-15.  
38
- 39 32. Wolf-Maier K, Cooper RS, Banegas JR, et al. Hypertension prevalence and blood  
40  
41 pressure levels in 6 European countries, Canada, and the United States. *JAMA*.  
42  
43 2003;289(18):2363-9.  
44
- 45 33. Borden WB, Maddox TM, Tang F, et al. Impact of the 2014 expert panel  
46  
47 recommendations for management of high blood pressure on contemporary  
48  
49 cardiovascular practice: insights from the NCDR PINNACLE registry. *J Am Coll*  
50  
51 *Cardiol*. 2014;64(21):2196-203.  
52
- 53 34. Xu W, Goldberg SI, Shubina M, et al. Optimal systolic blood pressure target, time to  
54  
55 intensification, and time to follow-up in treatment of hypertension: population  
56  
57 based retrospective cohort study. *BMJ*. 2015;350:h158.  
58  
59  
60

- 1  
2  
3  
4 35. Gradman AH, Parise H, Lefebvre P, et al. Initial combination therapy reduces the risk  
5  
6 of cardiovascular events in hypertensive patients: a matched cohort study.  
7  
8 *Hypertension*. 2013;61(2):309-18.  
9  
10 36. Spence JD, Rayner BL. J curve and cuff artefact, and diagnostic inertia in resistant  
11  
12 hypertension. *Hypertension*. 2016;67(1):32-3.  
13  
14 37. Phillips LS, Branch WT, Cook CB, et al. Clinical inertia. *Ann Intern Med*.  
15  
16 2001;135(9):825-34.  
17  
18  
19  
20  
21  
22  
23  
24  
25  
26  
27  
28  
29  
30  
31  
32  
33  
34  
35  
36  
37  
38  
39  
40  
41  
42  
43  
44  
45  
46  
47  
48  
49  
50  
51  
52  
53  
54  
55  
56  
57  
58  
59  
60

## Figure legends

### **Figure 1: Time course of blood pressure measurement during the study period.**

Home blood pressures were the average of 5 days before randomisation without any antihypertensive treatment, after 10 to 28 days of monotherapy, and at the end of the follow-up period. Patients with 3 to 4 days of home blood pressure data in each interval were also included. ACEI, angiotensin-converting enzyme inhibitor; ARB, angiotensin receptor blocker; CCB, calcium channel blocker.

### **Figure 2. Reduction in the systolic home blood pressure during monotherapy categorized by pretreatment home (left panel) and office (right panel) blood pressure.**

Error bars indicate the 95% confidence interval. Data were adjusted for sex, age, body mass index, diabetes mellitus, current smoking and drinking, hypercholesterolemia, history of cardiovascular disease, and defined daily dose during monotherapy.

### **Figure 3. Reduction in the systolic home blood pressure during monotherapy categorized by pretreatment home blood pressure, stratified by defined daily dose (0.5 units, left panel; 1 unit, right panel).**

Error bars indicate 95% confidence intervals. Data were adjusted for sex, age, body mass index, diabetes mellitus, current smoking and drinking, hypercholesterolemia, and history of cardiovascular disease.

### **Figure 4. Reduction in the follow-up systolic blood pressure categorized by pretreatment office blood pressure.**

Error bars indicate 95% confidence intervals. Data were Adjusted for sex, age, body mass index, diabetes mellitus, current smoking and drinking, hypercholesterolemia,



1  
2  
3  
4  
5  
6  
7  
8  
9  
10  
11  
12  
13  
14  
15  
16  
17  
18  
19  
20  
21  
22  
23  
24  
25  
26  
27  
28  
29  
30  
31  
32  
33  
34  
35  
36  
37  
38  
39  
40  
41  
42  
43  
44  
45  
46  
47  
48  
49  
50  
51  
52  
53  
54  
55  
56  
57  
58  
59  
60

history of cardiovascular disease, and defined daily dose at the end of follow-up period (mean, 7.0 years).

For peer review only

**Table 1: Baseline characteristics of patients.**

| Characteristics                     | Systolic home blood pressure at baseline, mmHg |               |               |               | <i>P</i> |
|-------------------------------------|------------------------------------------------|---------------|---------------|---------------|----------|
|                                     | <145                                           | 145–154       | 155–164       | ≥165          |          |
| Number of participants              | 763                                            | 699           | 544           | 417           |          |
| Women, n                            | 416 (54.5)                                     | 342 (48.9)*   | 275 (50.6)    | 202 (48.4)    | 0.11     |
| Age, years                          | 59.3 (10.0)                                    | 59.3 (9.7)    | 61.0 (9.8)†   | 61.3 (9.5)    | 0.0003   |
| Body mass index, kg/m <sup>2</sup>  | 24.2 (3.5)                                     | 24.2 (3.2)    | 24.6 (3.4)    | 24.8 (3.2)    | 0.0017   |
| Smoking, n                          | 142 (18.6)                                     | 138 (19.7)    | 112 (20.6)    | 109 (26.1)*   | 0.019    |
| Drinking, n                         | 347 (45.5)                                     | 344 (49.2)    | 270 (49.6)    | 211 (50.6)    | 0.27     |
| Diabetes mellitus, n                | 122 (16.0)                                     | 101 (14.4)    | 85 (15.6)     | 70 (16.8)     | 0.74     |
| Hypercholesterolemia, n             | 399 (52.3)                                     | 372 (53.2)    | 287 (52.8)    | 203 (48.7)    | 0.49     |
| Previous cardiovascular diseases, n | 25 (3.3)                                       | 17 (2.4)      | 17 (3.1)      | 7 (1.7)       | 0.37     |
| Home blood pressure                 |                                                |               |               |               |          |
| Systolic, mmHg                      | 139.8 (3.0)                                    | 149.6 (2.9)§  | 159.4 (2.8)§  | 171.3 (4.3)§  | <0.0001  |
| Diastolic, mmHg                     | 84.4 (8.4)                                     | 89.8 (8.9)§   | 92.6 (10.0)§  | 95.9 (10.9)§  | <0.0001  |
| Office blood pressure               |                                                |               |               |               |          |
| Systolic, mmHg                      | 147.7 (15.5)                                   | 153.7 (16.5)§ | 157.8 (16.5)§ | 165.4 (17.1)§ | <0.0001  |
| Diastolic, mmHg                     | 87.1 (11.2)                                    | 90.4 (11.8)§  | 91.1 (12.3)   | 94.0 (13.1)‡  | <0.0001  |

Values are expressed as the arithmetic mean (standard deviation) or number (%). *P* values were calculated by an analysis of variance or the chi-squared test among the four systolic home blood pressure groups at baseline during pretreatment. For missing values of body mass index ( $n=40$ ), single imputation with regression on sex and age was conducted.

Significance of differences from the left adjacent column: \* $P<0.05$ , † $P<0.01$ , ‡ $P<0.001$ , and § $P<0.0001$ .

**Table 2: Home systolic blood pressure values according to the measurement days.**

| Baseline blood pressure category | Number of patients | Home blood pressure measurement days (times) |              |              |              |              | <i>P</i> |
|----------------------------------|--------------------|----------------------------------------------|--------------|--------------|--------------|--------------|----------|
|                                  |                    | First                                        | Second       | Third        | Forth        | Fifth        |          |
| Pretreatment, mmHg               |                    |                                              |              |              |              |              |          |
| All                              | 2423               | 152.5 (14.7)                                 | 152.5 (14.8) | 152.2 (14.9) | 152.4 (14.6) | 152.6 (14.9) | 0.48     |
| <145                             | 763                | 140.3 (9.1)                                  | 139.6 (8.4)  | 139.1 (8.8)  | 139.7 (8.2)  | 140.4 (9.6)  | 0.032    |
| 145–154                          | 699                | 149.6 (9.9)                                  | 150.0 (9.4)  | 149.5 (9.7)  | 149.5 (9.2)  | 149.5 (9.5)  | 0.85     |
| 155–164                          | 544                | 159.3 (10.3)                                 | 158.7 (10.3) | 159.5 (9.6)  | 159.8 (9.7)  | 159.8 (10.5) | 0.41     |
| ≥165                             | 417                | 170.9 (11.3)                                 | 172.0 (10.3) | 171.1 (10.4) | 171.0 (11.2) | 171.4 (11.5) | 0.66     |
| Monotherapy, mmHg                |                    |                                              |              |              |              |              |          |
| All                              | 2423               | 145.5 (17.0)                                 | 145.2 (16.9) | 145.4 (16.5) | 145.4 (16.5) | 144.7 (16.6) | 0.58     |
| <145                             | 763                | 135.3 (13.2)                                 | 135.1 (13.1) | 135.5 (13.4) | 135.8 (13.2) | 135.1 (13.1) | 0.56     |
| 145–154                          | 699                | 143.8 (13.8)                                 | 143.1 (13.3) | 143.3 (13.0) | 142.9 (13.3) | 141.9 (12.9) | 0.035    |
| 155–164                          | 544                | 150.2 (15.3)                                 | 150.5 (15.4) | 150.5 (14.6) | 151.2 (14.4) | 150.5 (14.7) | 0.67     |
| ≥165                             | 417                | 161.1 (16.5)                                 | 160.0 (17.0) | 160.3 (15.4) | 160.1 (16.1) | 160.5 (15.9) | 0.65     |

Values are expressed as the arithmetic mean (standard deviation). The numbers of patients with missing blood pressure data on the fourth and fifth days were 38 and 84 at pretreatment and 87 and 286 during monotherapy, respectively, while *P* values were calculated by a repeated measure mixed linear model to take missing values into account and represent the differences among the five systolic home blood pressure values according to the measurement day at baseline during pretreatment.

Differences between the adjacent days were not significant during pretreatment ( $P \geq 0.12$ ) or monotherapy ( $P \geq 0.14$ ).

1  
2  
3  
4  
5  
6  
7  
8  
9  
10  
11  
12  
13  
14  
15  
16  
17  
18  
19  
20  
21  
22  
23  
24  
25  
26  
27  
28  
29  
30  
31  
32  
33  
34  
35  
36  
37  
38  
39  
40  
41  
42  
43  
44  
45  
46  
47  
48  
49  
50  
51  
52  
53  
54  
55  
56  
57  
58  
59  
60



Figure 1: Time course of blood pressure measurement during the study period. Home blood pressures were the average of 5 days before randomisation without any antihypertensive treatment, after 10 to 28 days of monotherapy initiation, and at the end of follow-up period. Patients with 3 to 4 days of home blood pressure data in each interval were also included. ACEI, angiotensin-converting enzyme inhibitor; ARB, angiotensin receptor blocker; CCB, calcium channel blocker.

193x74mm (600 x 600 DPI)

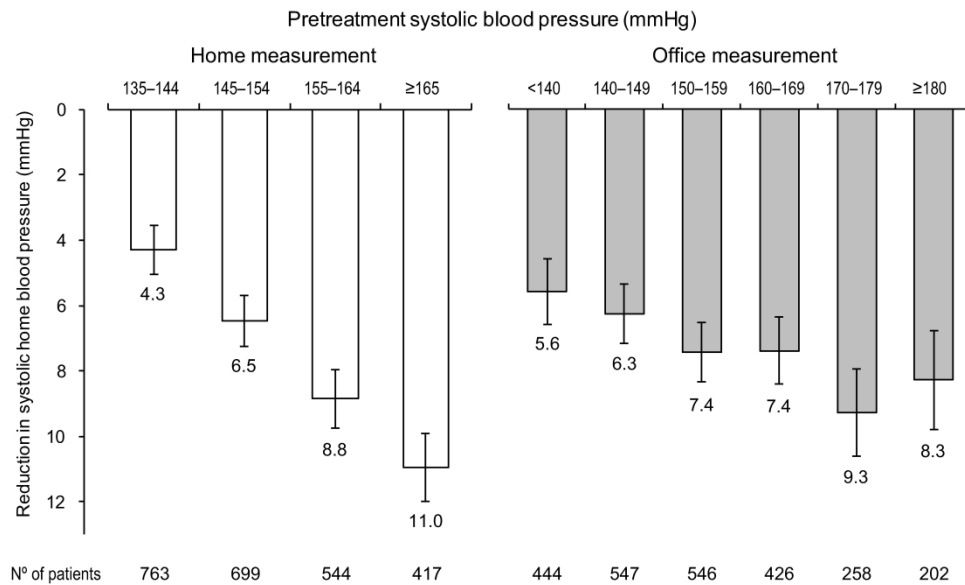

Figure 2. Reduction in the systolic home blood pressure during monotherapy categorized by pretreatment home (left panel) and office (right panel) blood pressure. Error bars indicate 95% confidence interval. Data were adjusted for sex, age, body mass index, diabetes mellitus, current smoking and drinking, hypercholesterolemia, history of cardiovascular disease, and defined daily dose during monotherapy.

236x144mm (600 x 600 DPI)



Figure 3. Reduction in the systolic home blood pressure during monotherapy categorized by pretreatment home blood pressure, stratified by defined daily dose (0.5 unit, left panel; 1 unit, right panel). Error bars indicate 95% confidence interval. Data were adjusted for sex, age, body mass index, diabetes mellitus, current smoking and drinking, hypercholesterolemia, and history of cardiovascular disease.

206x119mm (600 x 600 DPI)

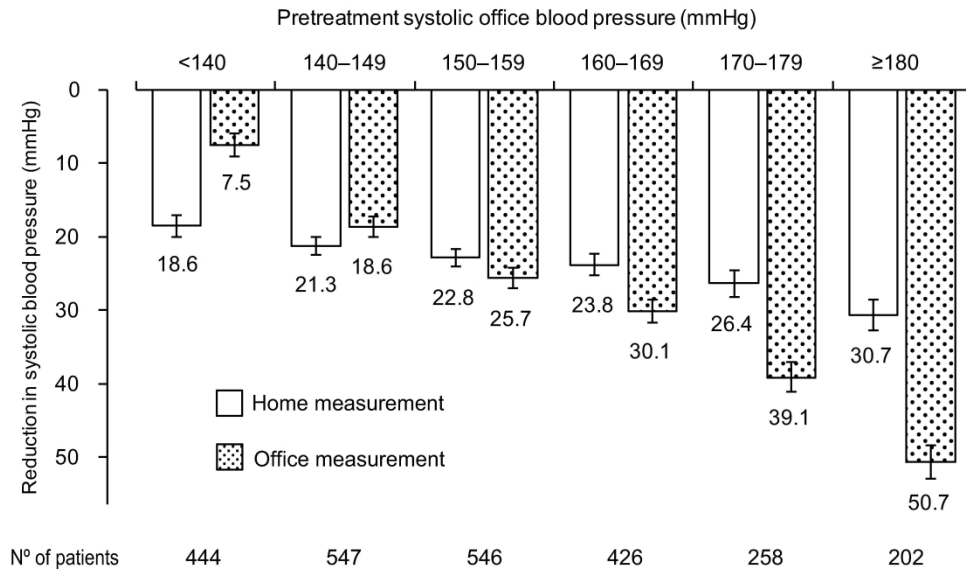

Figure 4. Reduction in the follow-up systolic blood pressure categorized by pretreatment office blood pressure.

Error bars indicate 95% confidence interval. Adjusted for sex, age, body mass index, diabetes mellitus, current smoking and drinking, hypercholesterolemia, history of cardiovascular disease, and defined daily dose at the end of follow-up period (mean, 7.0 years).

196x115mm (600 x 600 DPI)

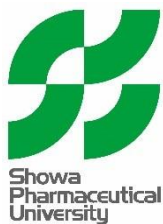

DXI (28/09/20 19:41)  
Hihom11\_spl  
BMJ Open

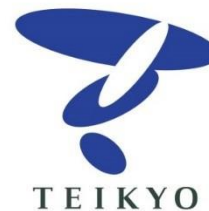

## SUPPLEMENTARY INFORMATION

### **Antihypertensive drug effects according to the pretreatment self-measured home blood pressure: the HOMED-BP study**

Short title: Wilder's Law on Home Blood Pressure

Hikari Sano, Azusa Hara, Kei Asayama, Seiko Miyazaki, Masahiro Kikuya, Yutaka Imai, Takayoshi Ohkubo,

on behalf of

Hypertension Objective Treatment Based on Measurement by Electrical Devices of Blood Pressure (HOMED-BP) investigators

This appendix function as part of the original submission and has been peer-reviewed.

We have posted it as supplied by the authors.



**Supplemental Table 1: Baseline characteristics of the analysed patients ( $n=2,423$ ), all excluded patients ( $n=1,095$ ), and patients excluded due to an insufficient number of home blood pressure measurements ( $n=694$ ).**

| Characteristics                     | Analysed     | Excluded     |                           | <i>P</i> | <i>P</i> |
|-------------------------------------|--------------|--------------|---------------------------|----------|----------|
|                                     |              | Any Reason   | Insufficient Home Reading |          |          |
| Number of participants              | 2423         | 1095         | 694                       |          |          |
| Women, n                            | 1235 (51.0)  | 528 (48.2)   | 355 (51.2)                | 0.13     | 0.93     |
| Age, years                          | 60.0 (9.8)   | 58.6 (10.5)  | 59.1 (10.7)               | <0.0001  | 0.030    |
| Body mass index, kg/m <sup>2</sup>  | 24.4 (3.3)   | 24.4 (3.6)   | 24.4 (3.6)                | >0.99    | 0.97     |
| Smoking, n                          | 501 (20.7)   | 242 (22.1)   | 149 (21.5)                | 0.34     | 0.65     |
| Drinking, n                         | 1172 (48.4)  | 499 (45.6)   | 299 (43.1)                | 0.12     | 0.014    |
| Diabetes mellitus, n                | 378 (15.6)   | 160 (14.6)   | 105 (15.1)                | 0.45     | 0.76     |
| Hypercholesterolemia, n             | 1261 (52.0)  | 542 (49.5)   | 347 (50.0)                | 0.16     | 0.34     |
| Previous cardiovascular diseases, n | 66 (2.7)     | 40 (3.7)     | 31 (4.5)                  | 0.14     | 0.020    |
| Home blood pressure                 |              |              |                           |          |          |
| Systolic, mmHg                      | 152.5 (11.6) | 149.7 (14.1) | 152.6 (13.0)              | <0.0001  | 0.83     |
| Diastolic, mmHg                     | 89.8 (10.3)  | 90.2 (9.5)   | 90.5 (9.8)                | 0.26     | 0.12     |

## Office blood pressure

|                 |              |              |        |              |      |
|-----------------|--------------|--------------|--------|--------------|------|
| Systolic, mmHg  | 154.7 (17.4) | 153.0 (17.7) | 0.0064 | 154.2 (17.2) | 0.49 |
| Diastolic, mmHg | 90.1 (12.2)  | 90.3 (12.2)  | 0.71   | 90.0 (12.3)  | 0.85 |

Values are expressed as the arithmetic mean (standard deviation) or number (%). *P* values were calculated by the t-test or the chisquared test, with comparisons made between the 2,423 analysed patients and each excluded group.

For peer review only

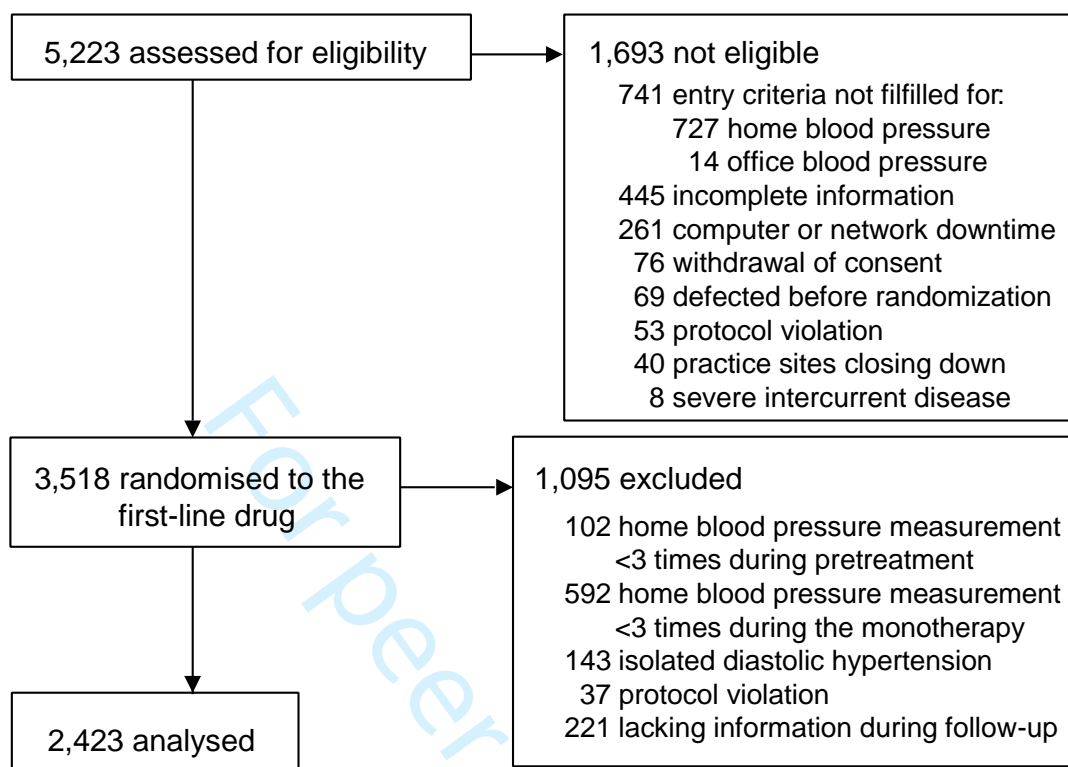

**Supplemental Figure 1: Flowchart of the study.**

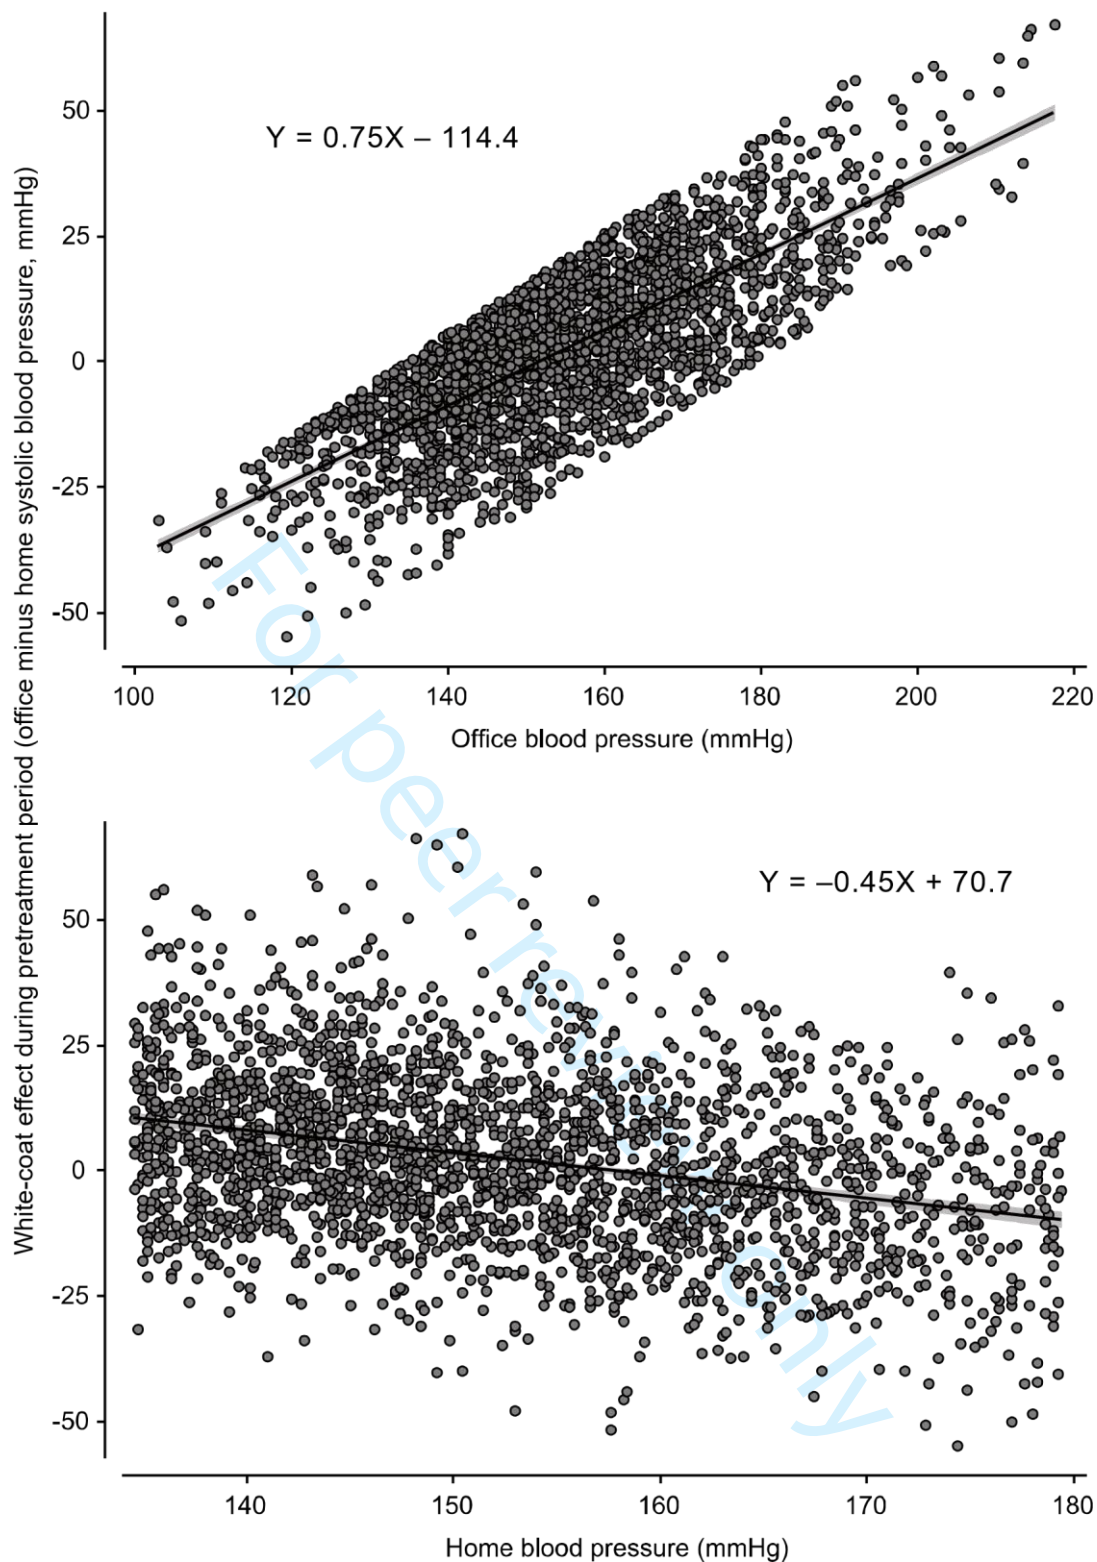

**Supplemental Figure 2: Relationship between the white-coat effect and office systolic blood pressure (A) as well as home blood pressure (B) during pretreatment period.** The white-coat effect was defined as the office blood pressure minus the home blood pressure as a continuous variable. Regression line with 95% confidence limits were overlay on each scatter plot. Because systolic home blood pressure ranged 135–179 mmHg in this population, plots in panel A demonstrate as a band-like distribution which rises to the right.

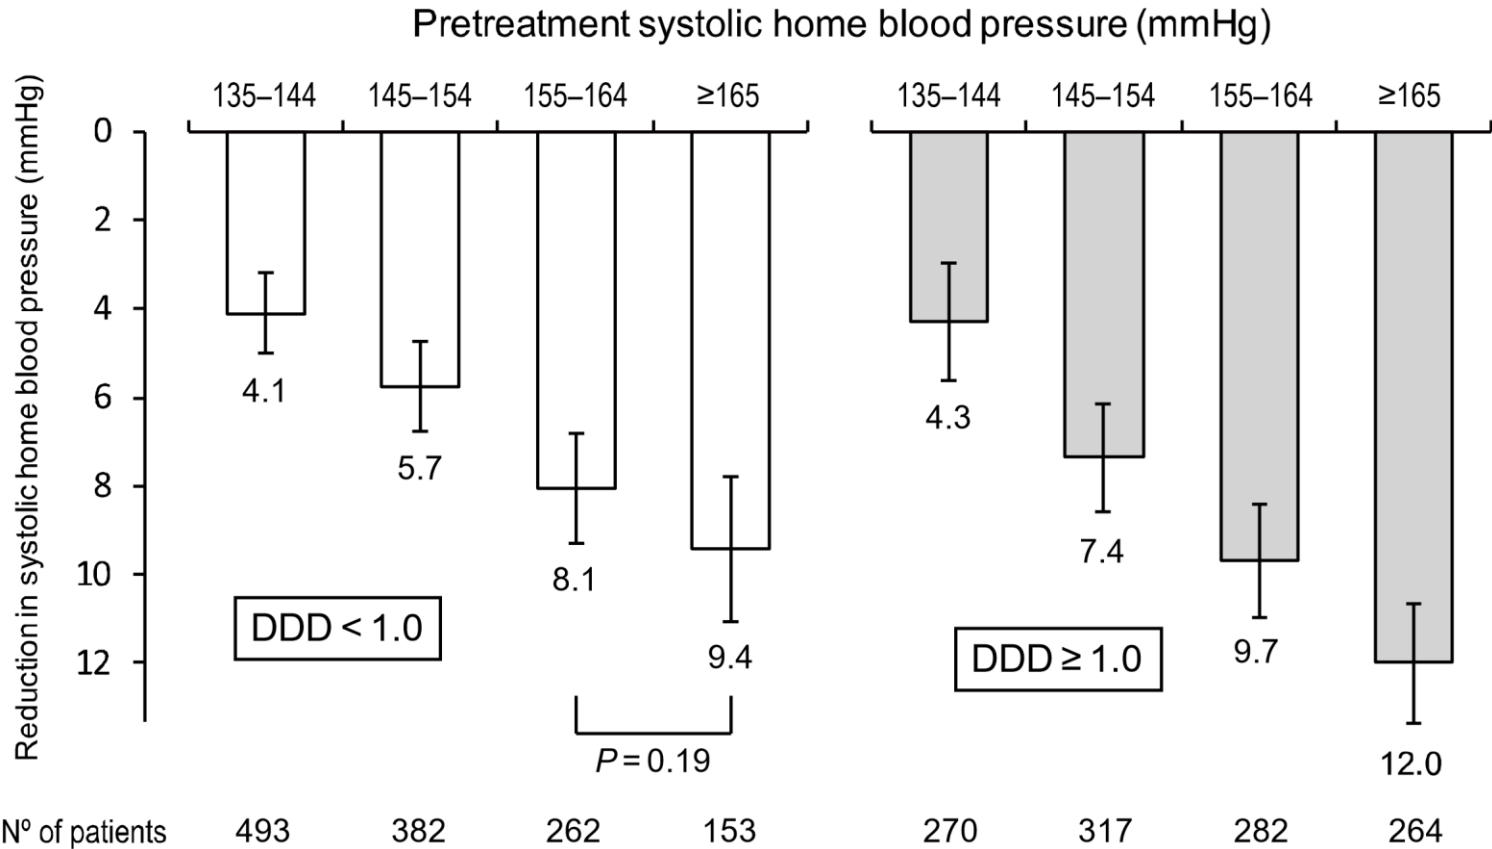

**Supplemental Figure 3: Reduction in the systolic home blood pressure during monotherapy categorized by pretreatment home blood pressure and stratified by defined daily dose (<1 unit, left panel; ≥1 unit, right panel).**

Error bars indicate 95% confidence interval. Data were adjusted for sex, age, body mass index, diabetes mellitus, current smoking and drinking, hypercholesterolemia, history of cardiovascular disease, and defined daily dose during monotherapy.

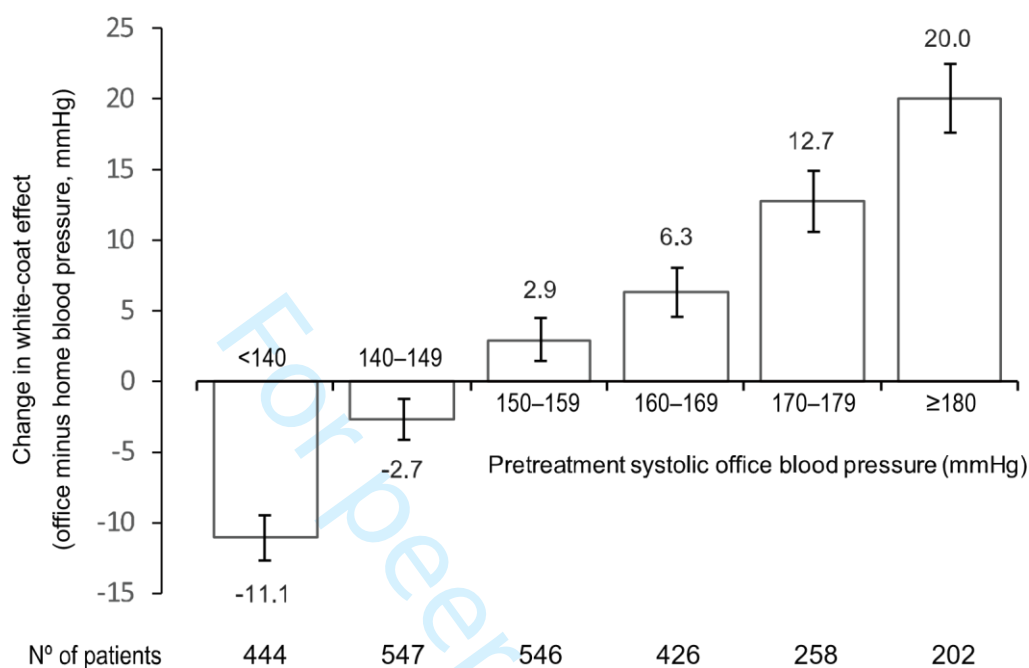

**Supplemental Figure 4: Changes in the white-coat effect during follow-up categorized by the pretreatment office blood pressure.**

Error bars indicate 95% confidence interval. The white-coat effect was defined as the office blood pressure minus the home blood pressure, and changes in the white-coat effect were determined by subtracting the effect observed at the end of follow-up period from the effect during pretreatment.

# BMJ Open

## Antihypertensive drug effects according to the pretreatment self-measured home blood pressure: the HOMED-BP study

|                                 |                                                                                                                                                                                                                                                                                                                                                                                                                                                                                                                                                               |
|---------------------------------|---------------------------------------------------------------------------------------------------------------------------------------------------------------------------------------------------------------------------------------------------------------------------------------------------------------------------------------------------------------------------------------------------------------------------------------------------------------------------------------------------------------------------------------------------------------|
| Journal:                        | <i>BMJ Open</i>                                                                                                                                                                                                                                                                                                                                                                                                                                                                                                                                               |
| Manuscript ID                   | bmjopen-2020-040524.R2                                                                                                                                                                                                                                                                                                                                                                                                                                                                                                                                        |
| Article Type:                   | Original research                                                                                                                                                                                                                                                                                                                                                                                                                                                                                                                                             |
| Date Submitted by the Author:   | 17-Nov-2020                                                                                                                                                                                                                                                                                                                                                                                                                                                                                                                                                   |
| Complete List of Authors:       | Sano, Hikari; Showa Pharmaceutical University, Social Pharmacy and Public Health<br>Hara, Azusa; Keio University, Pharmacy<br>Asayama, Kei; KU Leuven, Studies Coordinating Centre, Laboratory of Hypertension ; Teikyo University, Hygiene and Public Health<br>Miyazaki, Seiko; Showa Pharmaceutical University, Social Pharmacy and Public Health<br>Kikuya, Masahiro; Teikyo University, Hygiene and Public Health<br>Imai, Yutaka ; Tohoku Institute for Management of Blood Pressure<br>Ohkubo, Takayoshi; Teikyo University, Hygiene and Public Health |
| <b>Primary Subject Heading</b>: | Cardiovascular medicine                                                                                                                                                                                                                                                                                                                                                                                                                                                                                                                                       |
| Secondary Subject Heading:      | Cardiovascular medicine                                                                                                                                                                                                                                                                                                                                                                                                                                                                                                                                       |
| Keywords:                       | Hypertension < CARDIOLOGY, Cardiology < INTERNAL MEDICINE, EPIDEMIOLOGY                                                                                                                                                                                                                                                                                                                                                                                                                                                                                       |
|                                 |                                                                                                                                                                                                                                                                                                                                                                                                                                                                                                                                                               |

SCHOLARONE™  
Manuscripts



I, the Submitting Author has the right to grant and does grant on behalf of all authors of the Work (as defined in the below author licence), an exclusive licence and/or a non-exclusive licence for contributions from authors who are: i) UK Crown employees; ii) where BMJ has agreed a CC-BY licence shall apply, and/or iii) in accordance with the terms applicable for US Federal Government officers or employees acting as part of their official duties; on a worldwide, perpetual, irrevocable, royalty-free basis to BMJ Publishing Group Ltd ("BMJ") its licensees and where the relevant Journal is co-owned by BMJ to the co-owners of the Journal, to publish the Work in this journal and any other BMJ products and to exploit all rights, as set out in our [licence](#).

The Submitting Author accepts and understands that any supply made under these terms is made by BMJ to the Submitting Author unless you are acting as an employee on behalf of your employer or a postgraduate student of an affiliated institution which is paying any applicable article publishing charge ("APC") for Open Access articles. Where the Submitting Author wishes to make the Work available on an Open Access basis (and intends to pay the relevant APC), the terms of reuse of such Open Access shall be governed by a Creative Commons licence – details of these licences and which [Creative Commons](#) licence will apply to this Work are set out in our licence referred to above.

Other than as permitted in any relevant BMJ Author's Self Archiving Policies, I confirm this Work has not been accepted for publication elsewhere, is not being considered for publication elsewhere and does not duplicate material already published. I confirm all authors consent to publication of this Work and authorise the granting of this licence.





## Antihypertensive drug effects according to the pretreatment self-measured home blood pressure: the HOMED-BP study

Short title: Wilder's Law on Home Blood Pressure

Hikari Sano, Azusa Hara, Kei Asayama (0000-0003-3365-0547), Seiko Miyazaki,  
Masahiro Kikuya, Yutaka Imai, Takayoshi Ohkubo,  
on behalf of  
Hypertension Objective Treatment Based on Measurement  
by Electrical Devices of Blood Pressure (HOMED-BP) investigators

Department of Social Pharmacy and Public Health, Showa Pharmaceutical University, Machida, Japan (H.S., A.H., S.M.); Department of Pharmacy, Division of Drug Development and Regulatory Science, Keio University, Tokyo, Japan (A.H.); Department of Hygiene and Public Health, Teikyo University School of Medicine, Tokyo, Japan (K.A., M.K, T.O.); Tohoku Institute for Management of Blood Pressure, Sendai, Japan (K.A., T.O., Y.I.); KU Leuven Department of Cardiovascular Sciences, University of Leuven, Leuven, Belgium (K.A.).

Word counts: manuscript 6481, abstract 247

Tables 2, Figures 4

**Correspondence to:**

Kei Asayama, MD, PhD,  
Department of Hygiene and Public Health,  
Teikyo University School of Medicine,  
2-11-1 Kaga, Itabashi-ku,  
Tokyo 173-8605, Japan

Telephone: +81-3-3964-3615

Facsimile: +81-3-3964-1058

email: kei@asayama.org

## Abstract

**Objectives:** To clarify whether or not the antihypertensive drug effect is proportional to the baseline pretreatment self-measured home blood pressure (HBP) in accordance with the law of initial value (Wilder's law).

**Design:** A Post-hoc analysis of a multicentre clinical trial.

**Setting:** Outpatients across Japan with mild-to-moderate essential hypertension.

**Participants:** Among 3,518 randomised participants, 2,423 who self-measured HBP during the pretreatment drug-free period (10–28 days after starting fixed-dose antihypertensive monotherapy) with a mean 7.0 years' follow-up were eligible.

**Main outcome measures:** We analysed individual HBP readings during pretreatment and monotherapy.

**Results:** The day-to-day HBP during both the pretreatment period and monotherapy period remains almost the same throughout each period; the results were consistent, regardless of the pretreatment HBP. Following monotherapy, the reduction in the HBP increased by 2.2 mmHg (95% confidence interval [CI], 1.8–2.5) per 10-mmHg pretreatment HBP increase, up to 11.0 mmHg (CI, 9.9–12.0) among patients with an HBP  $\geq 165$  mmHg during pretreatment. Among the 1,005 patients receiving low-dose monotherapy (defined daily dose: 0.5 units), the reduction peaked at 8.9–9.1 mmHg in those with pretreatment HBP 155–164 and  $\geq 165$  mmHg ( $P=0.88$ ).

**Conclusions:** According to Wilder's law, the HBP reduction due to fixed-dose monotherapy was proportional to the pretreatment HBP without any regression to the mean phenomenon. With low-dose antihypertensive drugs, however, the HBP reduction peaked in patients with a high pretreatment HBP, indicating the need for such patients to receive a sufficient amount of antihypertensive drug medication at the initial treatment.

**Trial registration:** UMIN Clinical Trial Registry (<http://www.umin.ac.jp/ctr>), Unique identifier: C000000137.

1  
2  
3  
4 **Keywords:** blood pressure reduction, antihypertensive treatment, home blood pressure,  
5 self-measurement, Wilder's law, regression to the mean  
6  
7  
8  
9

## 10 **Article summary**

### 11 **Strengths and limitations of this study**

- 12 ● This is a post-hoc analysis of a multicentre clinical trial in which patients were  
13 recruited from 457 general practices throughout Japan.
- 14 ● Enrolled 2,423 patients with mild-to-moderate essential hypertension measured their  
15 daily self-measurement of blood pressure at home during the pretreatment period,  
16 after antihypertensive monotherapy, and for a mean 7.0 years' follow-up.  
17
- 18 ● Home blood pressure was self-measured using a validated upper-arm cuff-  
19 oscillometric OMRON HEM 7471C-N device, in which all measured data, including  
20 the measurement time, were automatically recorded.  
21
- 22 ● We were unable to assess the placebo effect because all patients received  
23 antihypertensive medication.  
24
- 25 ● Limitations of the studies included large number of excluded participants (1,095 of  
26 the randomized 3,518 patients) by which we should practice caution when applying  
27 the findings regarding antihypertensive drug effect to real-world clinical practice.  
28  
29  
30  
31  
32  
33  
34  
35  
36  
37  
38  
39  
40  
41  
42  
43  
44  
45  
46  
47  
48  
49  
50  
51  
52  
53  
54  
55  
56  
57  
58  
59  
60

## Introduction

Hypertension is a major risk factor for cardiovascular disease.<sup>1 2</sup> A meta-analysis showed that a 10/5 mmHg reduction in conventional office systolic/diastolic blood pressure reduces the stroke risk by approximately 40% and the coronary artery disease risk by approximately 20%.<sup>3</sup> However, office blood pressure has major limitations including being affected by the white-coat phenomenon, i.e. a warning response wherein the office blood pressure unexpectedly rises when in an examination room in front of medical staff.<sup>4</sup> In contrast, self-measured home blood pressure assessed using automated devices in a non-medical setting can obtain a plurality of readings over a long period under relatively uniform conditions, resulting in highly reproducible values without observer bias when patients apply a standardised protocol.<sup>2 4 5</sup> Home monitoring is unaffected by the white-coat phenomenon and is suitable for the evaluation of drug efficacy.<sup>2 5 6</sup> Given its greater prognostic ability for cardiovascular complications than office blood pressure,<sup>1 2 7-9</sup> home blood pressure-based antihypertensive treatment is highly recommended.<sup>2 9</sup>

Recent studies<sup>10 11</sup> have reported that the higher the pretreatment blood pressure, the greater the reduction in the blood pressure by antihypertensive drug treatment, according to the law of initial value (Wilder's law<sup>12</sup>). However, the reduction in the 24-h ambulatory blood pressure corresponding to the pretreatment office blood pressure was shown to be relatively small.<sup>10</sup> Such disproportionality can be attributed to changes in the white-coat effect, which depends on pretreatment office blood pressure.<sup>10</sup> Although ambulatory and home blood pressures are both categorised as out-of-office blood pressure, the characteristics and usefulness of home blood pressure differ from those of ambulatory recordings,<sup>1 2 9</sup> and no report has described differences in antihypertensive drug effects according to the pretreatment blood pressure.

We therefore investigated the association between the pretreatment home and office blood pressures levels and home blood pressure reduction by antihypertensive

1  
2  
3  
4 monotherapy as well as long-term blood pressure changes in patients participating in a  
5  
6 home blood pressure-based clinical trial.  
7  
8  
9

## 10 **Methods**

### 11 **Study design**

12  
13 This was a post-hoc analysis of the Hypertension Objective Treatment based on  
14  
15 Measurement by Electrical Device of Blood Pressure (HOMED-BP) study<sup>13-15</sup>, which was  
16  
17 a multicentre clinical trial with a prospective, randomised, open-label, blinded end point,  
18  
19 evaluation (PROBE)<sup>16</sup> design. The HOMED-BP protocol complies with the Declaration of  
20  
21 Helsinki with respect to the ethical principles for medical research involving human  
22  
23 subjects<sup>17</sup> and is registered with the UMIN Clinical Trial Registry, number C000000137  
24  
25 (<http://www.umin.ac.jp/ctr>). The institutional review board of the Teikyo University School  
26  
27 of Medicine approved the study (17-044-2), and all study participants gave their written  
28  
29 informed consent.  
30  
31  
32

33  
34 We included patients with mild-to-moderate essential hypertension based on home  
35  
36 blood pressure (135–179/85–119 mmHg) with a minimum age of 40 years old; they were  
37  
38 recruited from 457 general practices throughout Japan<sup>14 15</sup>. The exclusion criteria were  
39  
40 severe hypertension (home blood pressure  $\geq 180/\geq 120$  mmHg or office blood pressure  
41  
42  $\geq 220/\geq 125$  mmHg), meeting the systolic criteria for the home blood pressure ( $\geq 135$   
43  
44 mmHg) but with a diastolic home blood pressure of  $< 65$  mmHg, meeting the diastolic  
45  
46 home blood pressure criteria ( $\geq 85$  mmHg) but with a systolic home blood pressure of  
47  
48  $< 110$  mmHg, or contraindications to either calcium channel blockers, angiotensin -  
49  
50 converting enzyme inhibitors, or angiotensin receptor blockers.  
51  
52

### 53 **Selection of patients**

54  
55 After the first visit at the initial registration, the 5,211 enrolled patients were followed-up  
56  
57 for at least two weeks without any antihypertensive drugs. At the second visit, the 3,518  
58  
59 (67.5%) eligible patients were randomised in a 2 × 3 design to receive monotherapy with  
60

1  
2  
3  
4 the first-line drug (calcium channel blockers, angiotensin-converting enzyme inhibitors, or  
5  
6 angiotensin receptor blockers) with target home blood pressure-based antihypertensive  
7  
8 values (usual control, ranging from 125 to 134 mmHg systolic and 80 to 84 mmHg  
9  
10 diastolic; tight control, <125 mmHg systolic and <80 mmHg diastolic). The reasons for  
11  
12 excluding the other 1,693 patients before randomisation have been described  
13  
14 elsewhere<sup>14</sup> and listed in Supplemental Figure 1.

15  
16  
17 In the present analysis, we excluded 1,095 of the randomised 3,518 patients because  
18  
19 they had obtained <3 home readings at baseline (pretreatment period;  $n=102$ ) or during  
20  
21 fixed-dose monotherapy with the first-line drug ( $n=592$ ), they had isolated diastolic  
22  
23 hypertension (home blood pressure  $\leq 135/\geq 85$  mmHg;  $n=143$ ), they did not actually  
24  
25 receive an antihypertensive drug or had been treated with  $\geq 2$  drug classes simultaneously  
26  
27 ( $n=37$ ), or we were unable to assess the blood pressure or treatment status during follow-  
28  
29 up ( $n=221$ ). A total of 2,423 participants were analysed statistically (Supplemental Figure  
30  
31 1). Based on our previous report indicating that the risks of cardiovascular outcomes  
32  
33 were similar in the randomised groups (tight vs. usual blood pressure control, and a  
34  
35 comparison of drug classes to initiate treatment) because of the small blood pressure  
36  
37 difference between the groups,<sup>14</sup> we combined all 2,423 participants in the present  
38  
39 analysis.  
40  
41

#### 42 **Measurements of blood pressure**

43  
44 Patients enrolled in HOMED-BP received spoken and written instructions on blood  
45  
46 pressure self-measurement and the utilisation of a validated cuff-oscillometric OMRON  
47  
48 HEM 7471C-N (Omron Healthcare Co., Ltd., Kyoto, Japan),<sup>18</sup> in which all measured data,  
49  
50 including the measurement time, are automatically recorded. The standard upper-arm  
51  
52 cuff, which covered 22–32 cm of a patient's arm circumference, was attached to the  
53  
54 device. The importance of using an appropriately sized cuff was noted in the user's  
55  
56 manual of the device, and we provided another cuff upon request. Throughout the study  
57  
58 period, patients were asked to self-measure their blood pressure at home once every  
59  
60

1  
2  
3  
4 morning within one hour of awakening, after urination, before breakfast, before taking  
5 antihypertensive medication, and after two minutes' rest in a sitting position.  
6  
7

8 Office blood pressure was measured by doctors in the outpatient clinic using a  
9 validated cuff-oscillometric OMRON HEM-907 (Omron Healthcare Co., Ltd., Kyoto,  
10 Japan).<sup>19</sup> At each visit, the office blood pressure was measured twice consecutively in a  
11 sitting position after at least two minutes' rest.  
12  
13  
14  
15

### 16 **The evaluation of the blood pressure**

17  
18 In this study, the baseline pretreatment home blood pressure was the average of all blood  
19 pressure measurements taken for five days before the second visit on randomisation, and  
20 the blood pressure during the monotherapy was the average of measurements taken for  
21 five days within the 10- to 28-day period after the initiation of randomised first-line drugs  
22 (Figure 1).<sup>20</sup> We used this time window for home readings because (1) the home blood  
23 pressure used for determining eligibility and treatment adjustments at every visit in the  
24 HOMED-BP study was the average of the home readings available over 5 days  
25 immediately preceding the visit,<sup>14</sup> (2) the clinical investigators followed the patients at  
26 intervals of approximately 2 to 4 weeks in general practice and approximately 4 to 8  
27 weeks at hospital outpatient clinics, and (3) the time interval needed to receive sufficient  
28 antihypertensive effects is reported to be approximately 7 to 23 days.<sup>21</sup> All of the home  
29 blood pressure values evaluated in the present study were therefore captured before the  
30 third visit, when drug titration might have been performed. The home blood pressure at  
31 the end of follow-up (mean follow-up period, 7.0 years; interquartile range, 5.1–9.1 years)  
32 was defined as the average of the last available five days of home blood pressure values.  
33 The office blood pressure during pretreatment and follow-up were the averages of the two  
34 consecutive measurements at each visit. The reduction in the blood pressure was  
35 calculated as the change from the pretreatment blood pressure at baseline.  
36  
37  
38  
39  
40  
41  
42  
43  
44  
45  
46  
47  
48  
49  
50  
51  
52  
53  
54  
55  
56  
57  
58  
59  
60

## Definition of comorbidity and quantification of drugs

The body mass index was calculated as the body weight in kilograms divided by the height in meters squared. Diabetes mellitus was defined as a fasting plasma glucose level of  $\geq 7.0$  mmol/L ( $\geq 126$  mg/dL), HbA1c of  $\geq 6.5\%$ , or treatment with oral antidiabetic drugs or insulin. Hypercholesterolemia was defined as a total serum cholesterol level of  $\geq 5.69$  mmol/L ( $\geq 220$  mg/dL), a history of hypercholesterolemia, or taking lipid-lowering drugs.<sup>14 20</sup>

We used the World Health Organization's defined daily dose (DDD) to quantify the use of antihypertensive drugs<sup>22</sup>; the DDD is the standard maintenance dose per day for a drug used for its main indication in adults.<sup>22</sup> The standard usage per day is defined as a DDD of 1 unit.

## Statistical analyses

For database management and statistical analyses, we used the SAS software package, version 9.4 (SAS Institute Inc., Cary, NC, USA). Statistical significance was set at an  $\alpha < 0.05$  on 2-sided tests. We focused on our analyses based on systolic blood pressure, as systolic pressure is the overriding risk factor in middle-aged and older people.<sup>23</sup>

Patients were divided into 4 groups ( $\leq 145$ , 145–154, 155–164, and  $\geq 165$  mmHg) according to the baseline pretreatment systolic home blood pressure, and the blood pressure reduction was compared among the groups. For office blood pressure assessments, patients were stratified into 10 -mmHg groups according to the pretreatment systolic office blood pressure, as in the report by Schmieder et al.<sup>10</sup> The chi-square test and an analysis of variance (ANOVA) were used to compare the baseline characteristics between groups appropriately. Home blood pressure values during the five pretreatment days as well as those during the five monotherapy days were compared by a repeated measure mixed linear model, as implemented in the PROC MIXED procedure of the SAS package with the residual maximum likelihood option as the estimation method for the covariance parameters and the Kenward and Roger



1  
2  
3  
4 approximation<sup>24</sup> for the degrees of freedom calculations. The blood pressure reduction  
5 was compared among groups according to the pretreatment blood pressure using an  
6 analysis of covariance (ANCOVA), and the change in the blood pressure reduction per  
7 pretreatment blood pressure increase was calculated using a linear regression model. In  
8 both analyses, the sex, age, body mass index, current smoking and drinking habit,  
9 hypercholesterolemia, diabetes mellitus, and history of cardiovascular disease were used  
10 for adjustments. The DDD during the initial antihypertensive monotherapy and at the end  
11 of follow-up were further used as the adjustment factors to compare the pressure  
12 reduction from pretreatment to the initial treatment and to the end of follow-up,  
13 respectively. For the 40 patients without body mass index data, we interpolated the value  
14 based on the sex and age (continuous). The white-coat effect was defined as the office  
15 blood pressure minus the home blood pressure as a continuous variable (negative value  
16 if the home blood pressure was higher than the office blood pressure)<sup>10 25 26</sup>, and changes  
17 in the white-coat effect were determined by subtracting the effect observed at the end of  
18 the follow-up period from the effect captured during pretreatment.

### 35 **Patient and public involvement**

36 No patients were involved in setting the research question or the outcome measures, nor  
37 were they involved in developing the plans for recruitment, design, or implementation of  
38 the study. No patients were asked to advise on the interpretation or writing up of the  
39 results. There are no specific plans to disseminate the results of the research to study  
40 participants or the relevant patient community beyond the usual channels of publication.

## 50 **Results**

### 51 **Representativeness of the study patients**

52 Supplemental Table 1 shows the baseline characteristics of the 2,423 patients included in  
53 the present analysis, along with the other 1,095 randomised patients excluded from the  
54 analysis and the 694 patients who were randomized but not included because they  
55  
56  
57  
58  
59  
60

1  
2  
3  
4 measured their home blood pressure <3 times. Although statistically significant  
5  
6 differences were found in the age ( $P \leq 0.030$ ), systolic blood pressure ( $P \leq 0.0064$ ) for the  
7  
8 comparison between analysed patients and all excluded patients, and in the drinking  
9  
10 habit and history of cardiovascular disease ( $P \leq 0.020$ ) for the comparison between  
11  
12 analysed patients and patients who were excluded due to an insufficient number of home  
13  
14 blood pressure measurements, all other characteristics were similar.

### 17 **Patients' characteristics**

18  
19 Table 1 shows the baseline characteristics of 2,423 patients. The average age of all  
20  
21 participants was 60.0 (standard deviation, 9.8) years old, and the proportion of women  
22  
23 was 51.0%. The Age, body mass index, smoking habit, and office blood pressure were  
24  
25 significantly and positively associated with the baseline systolic blood pressure category.  
26  
27 As shown in Table 2, the day-to-day home blood pressure measurements during both the  
28  
29 pretreatment period and monotherapy period remains almost the same throughout each  
30  
31 period. When patients were subdivided by the systolic home blood pressure at baseline,  
32  
33 there were significant differences between the patients with a home blood pressure <145  
34  
35 mmHg during the pretreatment period ( $P = 0.032$ ) and 145–154 mmHg during the  
36  
37 monotherapy period ( $P = 0.035$ ); however, the differences between adjacent days were not  
38  
39 significant even among those patients ( $P \geq 0.12$ ).

40  
41  
42  
43 The Relationship of the white-coat effect and office or home blood pressure values during  
44  
45 the pretreatment period as a cross-sectional approach is shown in Supplemental Figure  
46  
47 2. The white-coat effect increased along with the office blood pressure (7.5 mmHg [95%  
48  
49 confidence limit, 7.3–7.8 mmHg] per 10-mmHg increment), whereas the home blood  
50  
51 pressure was negatively related to the white-coat effect (-4.5 mmHg [95% confidence  
52  
53 limit, -3.9 to -5.0 mmHg] per 10-mmHg home blood pressure increment).

## **Reduction in the home blood pressure by monotherapy according to the pretreatment blood pressure**

During the initial fixed-dose monotherapy, the reduction in the systolic home blood pressure was increased by 2.2 mmHg (95% confidence interval [CI], 1.8–2.5 mmHg) per 10-mmHg pretreatment home blood pressure increase. The reductions in each baseline pretreatment blood pressure group are shown in Figure 2. The slope of the home blood pressure reduction accompanying the increase in the pretreatment office blood pressure was shallower, increasing by 0.6 mmHg (95% CI, 0.4–0.9 mmHg) per 10-mmHg pretreatment office blood pressure increase.

### **Stratification by the DDD**

Figure 3 demonstrates the results according to the DDD of the initial antihypertensive drugs. Among 1,005 patients who started monotherapy with antihypertensive drugs of 1 unit DDD, the pretreatment home blood pressure was linearly associated with the blood pressure reduction at the time of monotherapy; the enhancement of the home blood pressure reduction for each increase in the pretreatment home blood pressure category was 2.6 mmHg (95% CI, 1.9–3.2 mmHg). However, among those receiving 0.5 units DDD ( $n=1,005$ ; occasionally the same number), significant enhancement in home blood pressure reductions was observed up to the 155–164 mmHg group (per 1 group increase, 2.1 mmHg; 95% CI, 1.2–2.9 mmHg), where it peaked; the reductions in the home blood pressure among patients with a pretreatment home blood pressure of 155–164 mmHg and  $\geq 165$  mmHg were 8.9 and 9.1 mmHg, respectively ( $P=0.88$ ). The results were confirmed when we divided the whole 2,423 patients according to a DDD of  $<1$  or  $\geq 1$  unit, as shown in Supplemental Figure 3.

## **Reduction in the follow-up blood pressure according to the pretreatment blood pressure**

According to the previous report based on ambulatory blood pressure monitoring,<sup>10</sup> we compared the home and office blood pressure reductions at the end of follow-up

1  
2  
3  
4 according to the baseline pretreatment office blood pressure. After 7.0 years' follow-up  
5  
6 with a mean DDD of 1.8 units (median 1.5; interquartile range, 1.0–2.5), the reduction in  
7  
8 the office blood pressure was linearly associated with the office blood pressure during  
9  
10 pretreatment (reduction in the home pressure from the office blood pressure category  
11  
12 <140 to ≥180 mmHg: 7.5 to 50.7 mmHg; Figure 4). Furthermore, similar to the previous  
13  
14 report based on ambulatory monitoring<sup>10</sup>, the reduction in the home blood pressure was  
15  
16 linearly associated with the office blood pressure during the pretreatment period;  
17  
18 however, the degree of home blood pressure reduction per the pretreatment office blood  
19  
20 pressure increase was weak (reduction in home pressure: 18.6 to 30.7 mmHg). Finally,  
21  
22 changes in the white-coat effect during the follow-up period increased significantly as the  
23  
24 pretreatment office blood pressure increased (Supplemental Figure 4; category increment  
25  
26  $P<0.0001$ ).

## 31 Discussion

32  
33 The antihypertensive drug effect depends on the pretreatment blood pressure. In line  
34  
35 with Wilder's law,<sup>12</sup> the home blood pressure reduction after the initial drug treatment was  
36  
37 proportional to the baseline pretreatment home blood pressure in the present study. The  
38  
39 current findings emphasize the need to assess the home blood pressure before treatment  
40  
41 when evaluating and initiating antihypertensive drug therapy.

42  
43  
44 Wilder indicated that the direction of the body function response depends to a large  
45  
46 extent on the initial level of that function, regardless of the agent.<sup>12</sup> Wilder's law predicts  
47  
48 that in the most severe hypertensive patients, the decrease in blood pressure will be  
49  
50 greater with the same medication than in those with less-severe hypertension. The  
51  
52 statistical phenomenon of regression to the mean (regression toward the mean) is  
53  
54 another major confounding factor hampering the accurate assessment of the effect of  
55  
56 antihypertensive agents.<sup>27</sup> However, as shown in Table 2, there were no regression  
57  
58 trends in the home blood pressure values from the first to the final measurement during  
59  
60

1  
2  
3  
4 the pretreatment or monotherapy periods, regardless of the pretreatment home blood  
5 pressure. This finding indicates the strength of the self-measurement of home blood  
6 pressure, as home measurement is associated with minimal (if any during an initial few  
7 days after the measurement begins<sup>28</sup>) regression to the mean.<sup>5 6 29</sup> Based on ambulatory  
8 blood pressure monitoring, regression to the mean was observed consistently among the  
9 five studies<sup>30</sup>, and a portion of the reduction in blood pressure after initiating  
10 antihypertensive treatment can be explained by this phenomenon<sup>30</sup>. However, there have  
11 been no reports investigating the biological mechanism contributing to this reduced  
12 influence of the regression to the mean phenomenon on self-measured home blood  
13 pressure. Nevertheless, home blood pressure measurement is likely to be useful for  
14 estimating the efficacy of antihypertensive drugs.

15  
16  
17  
18  
19  
20  
21  
22  
23  
24  
25  
26  
27  
28  
29  
30  
31  
32  
33  
34  
35  
36  
37  
38  
39  
40  
41  
42  
43  
44  
45  
46  
47  
48  
49  
50  
51  
52  
53  
54  
55  
56  
57  
58  
59  
60

Schmieder et al<sup>10</sup>. reported that the higher the baseline office blood pressure, the greater the blood pressure reduction after one year of treatment enhancement, and this was more obvious in the office blood pressure than in the ambulatory blood pressure.<sup>10</sup> A recent meta-analysis also showed that the overall treatment-induced reduction was greater for office blood pressure than for 24-h ambulatory blood pressure.<sup>11</sup> In the present study, the reduction in the office blood pressure at the end of a mean 7.0 years' follow-up was also greater than that in the self-measured home blood pressure (Figure 4). Schmieder et al<sup>10</sup>. attributed this discrepancy to the changes in the white-coat effect, i.e. the higher the baseline office blood pressure, the greater the decrease in the white-coat effect due to antihypertensive treatment. This assumption was also supported by the findings of the present study (Supplemental Figure 4); however, the white-coat effect may not be a main driver for the discrepancy because the home blood pressure reduction also followed Wilder's law despite the negative correlation between home blood pressure and white-coat effect during the pretreatment period. Nevertheless, the out-of-office blood pressure is theoretically free from the white-coat phenomenon,<sup>4</sup> and the reduction in the office blood pressure by antihypertensive treatment partially includes a reduction in the

1  
2  
3  
4 white-coat effect as well. We should therefore follow-up out-of-office-measured blood  
5  
6 pressure carefully, since patients with a higher blood pressure tend to show a greater  
7  
8 antihypertensive effect when their values are based on office-based measurements, while  
9  
10 their out-of-office blood pressure reduction might be insufficient, resulting in a persistent  
11  
12 high risk for cardiovascular complications.  
13

14  
15 Among 1,005 patients who were taking low-dose antihypertensive drugs, namely at a  
16  
17 DDD of 0.5 units, the reduction in home blood pressure during monotherapy in the group  
18  
19 with a pretreatment home blood pressure of  $\geq 165$  mmHg was almost identical to that in  
20  
21 the group with a pretreatment home blood pressure of 155–164 mmHg. A high home  
22  
23 blood pressure is associated with a high cardiovascular disease risk over the long term,  
24  
25 both before and during antihypertensive therapy.<sup>14 15</sup> Inadequate control of office blood  
26  
27 pressure with antihypertensive drug therapy remains a critical issue in Japan<sup>31</sup> as well as  
28  
29 in Europe<sup>32</sup> and the United States<sup>33</sup>. Previous studies<sup>34 35</sup> have shown the importance of  
30  
31 rapid blood pressure control, and the current findings suggest that a sufficient dosage of  
32  
33 antihypertensive drug from the beginning of treatment is necessary, particularly among  
34  
35 those with a high home blood pressure before starting treatment.  
36  
37

38  
39 Although the need to strengthen antihypertensive drug treatment has been gradually  
40  
41 accepted,<sup>1 2 9</sup> various factors associated with medical providers, patients, and healthcare  
42  
43 systems have contributed to clinical inertia (non-compliance).<sup>36 37</sup> Clinical inertia is  
44  
45 associated with inadequate blood pressure control, resulting in the increased risk of  
46  
47 adverse cardiovascular effects. Medical services should help overcome clinical inertia as  
48  
49 well as other hindrances in order to improve the blood pressure control of patients. Self-  
50  
51 measurement of home blood pressure is expected to ameliorate the status quo because  
52  
53 it promotes an improved awareness among patients with high blood pressure, helping  
54  
55 them adhere to antihypertensive lifestyle modifications and drug treatments.<sup>5</sup>  
56

57  
58 Our current study must be interpreted within the context of several potential limitations.  
59  
60 First, because the patients in HOMED-BP received home blood pressure-guided

1  
2  
3  
4 therapy,<sup>14</sup> their treatment was adjusted according to the self-measured home blood  
5  
6 pressure, and the office blood pressure was used as complimentary information. Second,  
7  
8 we excluded 1,095 (31.1%) of the randomised HOMED-BP patients, including 694 due to  
9  
10 an insufficient number of home readings. According to Supplemental Table 1, there is  
11  
12 likely little concern about the effect of exclusion on the balance between groups; however,  
13  
14 this lack of an effect cannot be fully guaranteed, thus we should practice caution when  
15  
16 applying the findings regarding antihypertensive drug effect to real-world clinical practice.  
17  
18 Third, we were unable to assess the placebo effect in the present study because all  
19  
20 patients received antihypertensive medication. The placebo effect is a major influencing  
21  
22 factor, in addition to Wilder's law and the regression to the mean phenomenon, in the  
23  
24 administration of antihypertensive medication.<sup>27</sup> Fourth, because office blood pressure  
25  
26 was measured less than 3 times at each visit, the regression to the mean on office blood  
27  
28 pressure cannot be assessed or compared with that on home blood pressure. Finally,  
29  
30 although our results are representative of middle- to old-aged Japanese patients, they  
31  
32 might not be applicable to other settings or ethnic groups with different distributions of risk  
33  
34 factors.  
35  
36

37  
38 In conclusion, the reduction in the home blood pressure by antihypertensive drug  
39  
40 monotherapy was proportional to the home blood pressure during the pretreatment drug-  
41  
42 free period, in accordance with Wilder's law.<sup>12</sup> However, the home blood pressure  
43  
44 reduction peaked in the patients who had a high pretreatment home blood pressure ( $\geq 155$   
45  
46 mmHg) when treatment was initiated with low-dose antihypertensive drugs. Patients with  
47  
48 a systolic home blood pressure of  $\geq 155$  mmHg before treatment might be considered to  
49  
50 have resistant hypertension because the effect of low-dose antihypertensive drug for the  
51  
52 blood pressure reduction reached the plateau, which seems against Wilder's law;  
53  
54 however, we cannot say too much about the issue because we enrolled patients with  
55  
56 mild-to-moderate essential hypertension in the HOMED-BP study, and those with severe  
57  
58 hypertension that tended to be resistant were not enrolled. Whether or not Wilder's law  
59  
60

1  
2  
3  
4 can be similarly applied to high -risk patients with severe hypertension remains unclear.  
5  
6 However, home blood pressure measurement was minimally affected by regression to the  
7  
8 mean, suggesting the usefulness of home blood pressure measurement for estimating  
9  
10 the efficacy of antihypertensive drugs. Patients with a high home blood pressure during  
11  
12 pretreatment should receive a sufficient amount of antihypertensive medication starting  
13  
14 from the very first treatment.  
15  
16  
17  
18

### 19 **Acknowledgements**

20 We would like to express our deepest appreciation to all of the HOMED-BP study  
21  
22 collaborators for their valuable contribution. We thank the staff of Teikyo University for  
23  
24 their valuable help.  
25  
26

### 27 **Contributors**

28  
29 KA, YI, and TO conceived of and designed the study; AH, KA, MK, and YI acquired the  
30  
31 data; and KA and HS carried out the statistical analyses. HS drafted the original  
32  
33 manuscript with KA and AH. SM, YI, and TO provided the intellectual input, and all  
34  
35 authors critically revised the manuscript and approved the final manuscript. KA is the  
36  
37 guarantor.  
38  
39

### 40 **Funding**

41  
42 This study was funded by grants from the Japan Cardiovascular Research Foundation,  
43  
44 the Japan Arteriosclerosis Prevention Fund, and Tohoku University. Fujitsu Systems  
45  
46 East Limited (Tokyo, Japan) and Omron Healthcare Co., Ltd. (Kyoto, Japan) developed  
47  
48 and maintained the Internet-based infrastructure for the measurement of the blood  
49  
50 pressure at home and the management of patients. This study was also supported by  
51  
52 Grants-in-Aid for Scientific Research (23390171, 25253059, 26860093, 16K15359,  
53  
54 17H04126, and 18K06759) from the Ministry of Education, Culture, Sports, Science and  
55  
56 Technology, Japan, and Grants-in-Aid for the Japanese Society for the Promotion of  
57  
58 Science (JSPS) fellows (25.7756 and 25.9328). No funding agencies had any role in the  
59  
60



1  
2  
3  
4 design or conduct of the study; in the collection, analysis, or interpretation of the data; or  
5  
6 in the preparation, review, or approval of the manuscript.  
7

### 8 **Competing interests**

9  
10 All authors have completed the ICMJE uniform disclosure form at  
11  
12 [www.icmje.org/coi\\_disclosure.pdf](http://www.icmje.org/coi_disclosure.pdf) and declare no support from any organisation for the  
13  
14 submitted work; KA, YI, and TO received research grants from Omron Healthcare. No  
15  
16 other relationships or activities appear to have influenced the submitted work.  
17

### 18 **Ethical approval**

19 Fully disclosed in the Study design section.  
20  
21

### 22 **Data sharing**

23 No additional data are available.  
24  
25

### 26 **Statements**

27  
28 The Corresponding Author (KA) has the right to and does grant on behalf of all authors  
29  
30 an exclusive licence on a worldwide basis to the BMJ Publishing Group, Ltd., for this  
31  
32 article (if accepted) to be published in BMJ editions and any other BMJ PGL products and  
33  
34 sublicenses such use and exploit of all subsidiary rights, as set out in our licence.  
35  
36

37  
38 The manuscript's guarantor (KA) affirms that the manuscript is an honest, accurate, and  
39  
40 transparent account of the study being reported; that no important aspects of the study  
41  
42 have been omitted; and that any discrepancies from the study as originally planned (and,  
43  
44 if relevant, registered) have been explained.  
45

### 46 **Dissemination declaration**

47  
48 Dissemination of the results to study participants is not possible.  
49  
50  
51  
52  
53  
54  
55  
56  
57  
58  
59  
60

## References

1. Williams B, Mancia G, Spiering W, et al. 2018 ESC/ESH Guidelines for the management of arterial hypertension. *Eur Heart J*. 2018;39(33):3021-104.
2. Umemura S, Arima H, Arima S, et al. The Japanese Society of Hypertension Guidelines for the Management of Hypertension (JSH 2019). *Hypertens Res*. 2019;42(9):1235-481.
3. Law MR, Morris JK, Wald NJ. Use of blood pressure lowering drugs in the prevention of cardiovascular disease: meta-analysis of 147 randomised trials in the context of expectations from prospective epidemiological studies. *BMJ*. 2009;338:b1665.
4. Asayama K, Li Y, Franklin SS, et al. Cardiovascular risk associated with white-coat hypertension: con side of the argument. *Hypertension*. 2017;70(4):676-82.
5. Imai Y, Hosaka M, Elnagar N, et al. Clinical significance of home blood pressure measurements for the prevention and management of high blood pressure. *Clin Exp Pharmacol Physiol*. 2014;41(1):37-45.
6. Imai Y, Ohkubo T, Hozawa A, et al. Usefulness of home blood pressure measurements in assessing the effect of treatment in a single-blind placebo-controlled open trial. *J Hypertens*. 2001;19(2):179-85.
7. Ohkubo T, Imai Y, Tsuji I, et al. Home blood pressure measurement has a stronger predictive power for mortality than does screening blood pressure measurement: a population-based observation in Ohasama, Japan. *J Hypertens*. 1998;16(7):971-75.
8. Asayama K, Ohkubo T, Kikuya M, et al. Prediction of stroke by self-measurement of blood pressure at home versus casual screening blood pressure measurement in relation to the JNC-7 classification: the Ohasama study. *Stroke*. 2004;35(10):2356-61.
9. Whelton PK, Carey RM, Aronow WS, et al. 2017 ACC/AHA/AAPA/ABC/ACPM/AGS/APhA/ASH/ASPC/NMA/PCNA Guideline for

- 1  
2  
3  
4 the Prevention, Detection, Evaluation, and Management of High Blood Pressure in  
5  
6 Adults: A Report of the American College of Cardiology/American Heart  
7  
8 Association Task Force on Clinical Practice Guidelines. *Hypertension*.  
9  
10 2018;71(6):e13-e115.  
11  
12 10. Schmieder RE, Schmidt ST, Riemer T, et al. Disproportional decrease in office blood  
13  
14 pressure compared with 24-hour ambulatory blood pressure with antihypertensive  
15  
16 treatment: dependency on pretreatment blood pressure levels. *Hypertension*.  
17  
18 2014;64(5):1067-72.  
19  
20 11. Soranna D, Zambon A, Corrao G, et al. Different effects of antihypertensive treatment  
21  
22 on office and ambulatory blood pressure: a meta-analysis. *J Hypertens*.  
23  
24 2019;37(3):467-75.  
25  
26 12. Wilder J. Basimetric approach (law of initial value) to biological rhythms. *Ann N Y*  
27  
28 *Acad Sci*. 1962;98:1211-20.  
29  
30 13. Fujiwara T, Nishimura T, Ohkuko T, et al. Rationale and design of HOMED-BP Study:  
31  
32 hypertension objective treatment based on measurement by electrical devices of  
33  
34 blood pressure study. *Blood Press Monit*. 2002;7(1):77-82.  
35  
36 14. Asayama K, Ohkubo T, Metoki H, et al. Cardiovascular outcomes in the first trial of  
37  
38 antihypertensive therapy guided by self-measured home blood pressure.  
39  
40 *Hypertens Res*. 2012;35(11):1102-10.  
41  
42 15. Watabe D, Asayama K, Hanazawa T, et al. Predictive power of home blood pressure  
43  
44 indices at baseline and during follow-up in hypertensive patients: HOMED-BP  
45  
46 study. *Hypertens Res*. 2018;41(8):622-28.  
47  
48 16. Hansson L, Hedner T, Dahlof B. Prospective randomized open blinded end-point  
49  
50 (PROBE) study. A novel design for intervention trials. Prospective Randomized  
51  
52 Open Blinded End-Point. *Blood Press*. 1992;1(2):113-9.  
53  
54  
55  
56  
57  
58  
59  
60

- 1  
2  
3  
4 17. World Medical Association. World Medical Association Declaration of Helsinki: ethical  
5  
6 principles for medical research involving human subjects. *JAMA*.  
7  
8 2013;310(20):2191-4.  
9
- 10 18. Chonan K, Kikuya M, Araki T, et al. Device for the self-measurement of blood  
11  
12 pressure that can monitor blood pressure during sleep. *Blood Press Monit*.  
13  
14 2001;6(4):203-05.  
15
- 16 19. White WB, Anwar YA. Evaluation of the overall efficacy of the Omron office digital  
17  
18 blood pressure HEM-907 monitor in adults. *Blood Press Monit*. 2001;6(2):107-10.  
19
- 20 20. Asayama K, Ohkubo T, Hanazawa T, et al. Does antihypertensive drug class affect  
21  
22 day-to-day variability of self-measured home blood pressure? the HOMED-BP  
23  
24 study. *J Am Heart Assoc*. 2016;5(3):e002995.  
25
- 26 21. Satoh M, Haga T, Hosaka M, et al. The velocity of antihypertensive effects of seven  
27  
28 angiotensin II receptor blockers determined by home blood pressure  
29  
30 measurements. *J Hypertens*. 2016;34(6):1218-23.  
31
- 32 22. World Health Organization. World Health Organization Collaborating Centre for Drug  
33  
34 Statistics Methodology System of Defined Daily Doses. 2018 [updated September  
35  
36 14, 2018. Available from: [http://www.whocc.no/atc\\_ddd\\_index/](http://www.whocc.no/atc_ddd_index/) accessed  
37  
38 September 14, 2018.  
39
- 40 23. Staessen J, Amery A, Fagard R. Isolated systolic hypertension in the elderly. *J*  
41  
42  
43  
44  
45  
46  
47  
48  
49  
50  
51  
52  
53  
54  
55  
56  
57  
58  
59  
60  
*Hypertens*. 1990;8(5):393-405.
24. Kenward MG, Roger JH. Small sample inference for fixed effects from restricted  
maximum likelihood. *Biometrics*. 1997;53(3):983-97.
25. Asayama K, Ohkubo T, Rakugi H, et al. Comparison of blood pressure values-self-  
measured at home, measured at an unattended office, and measured at a  
conventional attended office. *Hypertens Res*. 2019;42(11):1726-37.

- 1  
2  
3  
4 26. Ogata S, Kamide K, Asayama K, et al. Genome-wide association study for white coat  
5  
6 effect in Japanese middle-aged to elderly people: The HOMED-BP study. *Clin Exp*  
7  
8 *Hypertens*. 2018;40(4):363-69.  
9
- 10 27. Messerli FH, Rexhaj E. Of headwind and tailwind, regression to the mean and  
11  
12 Wilder's principle. *J Hypertens*. 2019;37(1):4-5.  
13
- 14 28. Ohkubo T, Asayama K, Kikuya M, et al. How many times should blood pressure be  
15  
16 measured at home for better prediction of stroke risk? Ten-year follow-up results  
17  
18 from the Ohasama study. *J Hypertens*. 2004;22(6):1099-104.  
19
- 20 29. Vaur L, Dubroca II, Dutrey-Dupagne C, et al. Superiority of home blood pressure  
21  
22 measurements over office measurements for testing antihypertensive drugs.  
23  
24 *Blood Press Monit*. 1998;3(2):107-14.  
25
- 26 30. Moore MN, Atkins ER, Salam A, et al. Regression to the mean of repeated  
27  
28 ambulatory blood pressure monitoring in five studies. *J Hypertens*. 2019;37(1):24-  
29  
30 29.  
31  
32
- 33 31. Asayama K, Hozawa A, Taguri M, et al. Blood pressure, heart rate, and double  
34  
35 product in a pooled cohort: the Japan Arteriosclerosis Longitudinal Study. *J*  
36  
37 *Hypertens*. 2017;35(9):1808-15.  
38
- 39 32. Wolf-Maier K, Cooper RS, Banegas JR, et al. Hypertension prevalence and blood  
40  
41 pressure levels in 6 European countries, Canada, and the United States. *JAMA*.  
42  
43 2003;289(18):2363-9.  
44
- 45 33. Borden WB, Maddox TM, Tang F, et al. Impact of the 2014 expert panel  
46  
47 recommendations for management of high blood pressure on contemporary  
48  
49 cardiovascular practice: insights from the NCDR PINNACLE registry. *J Am Coll*  
50  
51 *Cardiol*. 2014;64(21):2196-203.  
52
- 53 34. Xu W, Goldberg SI, Shubina M, et al. Optimal systolic blood pressure target, time to  
54  
55 intensification, and time to follow-up in treatment of hypertension: population  
56  
57 based retrospective cohort study. *BMJ*. 2015;350:h158.  
58  
59  
60

- 1  
2  
3  
4 35. Gradman AH, Parise H, Lefebvre P, et al. Initial combination therapy reduces the risk  
5  
6 of cardiovascular events in hypertensive patients: a matched cohort study.  
7  
8 *Hypertension*. 2013;61(2):309-18.  
9  
10 36. Spence JD, Rayner BL. J curve and cuff artefact, and diagnostic inertia in resistant  
11  
12 hypertension. *Hypertension*. 2016;67(1):32-3.  
13  
14 37. Phillips LS, Branch WT, Cook CB, et al. Clinical inertia. *Ann Intern Med*.  
15  
16 2001;135(9):825-34.  
17  
18  
19  
20  
21  
22  
23  
24  
25  
26  
27  
28  
29  
30  
31  
32  
33  
34  
35  
36  
37  
38  
39  
40  
41  
42  
43  
44  
45  
46  
47  
48  
49  
50  
51  
52  
53  
54  
55  
56  
57  
58  
59  
60

## Figure legends

### **Figure 1: Time course of blood pressure measurement during the study period.**

Home blood pressures were the average of 5 days before randomisation without any antihypertensive treatment, after 10 to 28 days of monotherapy, and at the end of the follow-up period. Patients with 3 to 4 days of home blood pressure data in each interval were also included. ACEI, angiotensin-converting enzyme inhibitor; ARB, angiotensin receptor blocker; CCB, calcium channel blocker.

### **Figure 2. Reduction in the systolic home blood pressure during monotherapy categorized by pretreatment home (left panel) and office (right panel) blood pressure.**

Error bars indicate the 95% confidence interval. Data were adjusted for sex, age, body mass index, diabetes mellitus, current smoking and drinking, hypercholesterolemia, history of cardiovascular disease, and defined daily dose during monotherapy.

### **Figure 3. Reduction in the systolic home blood pressure during monotherapy categorized by pretreatment home blood pressure, stratified by defined daily dose (0.5 units, left panel; 1 unit, right panel).**

Error bars indicate 95% confidence intervals. Data were adjusted for sex, age, body mass index, diabetes mellitus, current smoking and drinking, hypercholesterolemia, and history of cardiovascular disease.

### **Figure 4. Reduction in the follow-up systolic blood pressure categorized by pretreatment office blood pressure.**

Error bars indicate 95% confidence intervals. Data were Adjusted for sex, age, body mass index, diabetes mellitus, current smoking and drinking, hypercholesterolemia,

1  
2  
3  
4 history of cardiovascular disease, and defined daily dose at the end of follow-up  
5  
6 period (mean, 7.0 years).  
7  
8  
9  
10  
11  
12  
13  
14  
15  
16  
17  
18  
19  
20  
21  
22  
23  
24  
25  
26  
27  
28  
29  
30  
31  
32  
33  
34  
35  
36  
37  
38  
39  
40  
41  
42  
43  
44  
45  
46  
47  
48  
49  
50  
51  
52  
53  
54  
55  
56  
57  
58  
59  
60

For peer review only



**Table 1: Baseline characteristics of patients.**

| Characteristics                     | Systolic home blood pressure at baseline, mmHg |               |               |               | <i>P</i> |
|-------------------------------------|------------------------------------------------|---------------|---------------|---------------|----------|
|                                     | <145                                           | 145–154       | 155–164       | ≥165          |          |
| Number of participants              | 763                                            | 699           | 544           | 417           |          |
| Women, n                            | 416 (54.5)                                     | 342 (48.9)*   | 275 (50.6)    | 202 (48.4)    | 0.11     |
| Age, years                          | 59.3 (10.0)                                    | 59.3 (9.7)    | 61.0 (9.8)†   | 61.3 (9.5)    | 0.0003   |
| Body mass index, kg/m <sup>2</sup>  | 24.2 (3.5)                                     | 24.2 (3.2)    | 24.6 (3.4)    | 24.8 (3.2)    | 0.0017   |
| Smoking, n                          | 142 (18.6)                                     | 138 (19.7)    | 112 (20.6)    | 109 (26.1)*   | 0.019    |
| Drinking, n                         | 347 (45.5)                                     | 344 (49.2)    | 270 (49.6)    | 211 (50.6)    | 0.27     |
| Diabetes mellitus, n                | 122 (16.0)                                     | 101 (14.4)    | 85 (15.6)     | 70 (16.8)     | 0.74     |
| Hypercholesterolemia, n             | 399 (52.3)                                     | 372 (53.2)    | 287 (52.8)    | 203 (48.7)    | 0.49     |
| Previous cardiovascular diseases, n | 25 (3.3)                                       | 17 (2.4)      | 17 (3.1)      | 7 (1.7)       | 0.37     |
| Home blood pressure                 |                                                |               |               |               |          |
| Systolic, mmHg                      | 139.8 (3.0)                                    | 149.6 (2.9)§  | 159.4 (2.8)§  | 171.3 (4.3)§  | <0.0001  |
| Diastolic, mmHg                     | 84.4 (8.4)                                     | 89.8 (8.9)§   | 92.6 (10.0)§  | 95.9 (10.9)§  | <0.0001  |
| Office blood pressure               |                                                |               |               |               |          |
| Systolic, mmHg                      | 147.7 (15.5)                                   | 153.7 (16.5)§ | 157.8 (16.5)§ | 165.4 (17.1)§ | <0.0001  |
| Diastolic, mmHg                     | 87.1 (11.2)                                    | 90.4 (11.8)§  | 91.1 (12.3)   | 94.0 (13.1)‡  | <0.0001  |

Values are expressed as the arithmetic mean (standard deviation) or number (%). *P* values were calculated by an analysis of variance or the chi-squared test among the four systolic home blood pressure groups at baseline during pretreatment. For missing values of body mass index (*n*=40), single imputation with regression on sex and age was conducted.

Significance of differences from the left adjacent column: \**P*<0.05, †*P*<0.01, ‡*P*<0.001, and §*P*<0.0001.

**Table 2: Home systolic blood pressure values according to the measurement days.**

| Baseline blood pressure category | Number of patients | Home blood pressure measurement days (times) |              |              |              |              | <i>P</i> |
|----------------------------------|--------------------|----------------------------------------------|--------------|--------------|--------------|--------------|----------|
|                                  |                    | First                                        | Second       | Third        | Forth        | Fifth        |          |
| Pretreatment, mmHg               |                    |                                              |              |              |              |              |          |
| All                              | 2423               | 152.5 (14.7)                                 | 152.5 (14.8) | 152.2 (14.9) | 152.4 (14.6) | 152.6 (14.9) | 0.48     |
| <145                             | 763                | 140.3 (9.1)                                  | 139.6 (8.4)  | 139.1 (8.8)  | 139.7 (8.2)  | 140.4 (9.6)  | 0.032    |
| 145–154                          | 699                | 149.6 (9.9)                                  | 150.0 (9.4)  | 149.5 (9.7)  | 149.5 (9.2)  | 149.5 (9.5)  | 0.85     |
| 155–164                          | 544                | 159.3 (10.3)                                 | 158.7 (10.3) | 159.5 (9.6)  | 159.8 (9.7)  | 159.8 (10.5) | 0.41     |
| ≥165                             | 417                | 170.9 (11.3)                                 | 172.0 (10.3) | 171.1 (10.4) | 171.0 (11.2) | 171.4 (11.5) | 0.66     |
| Monotherapy, mmHg                |                    |                                              |              |              |              |              |          |
| All                              | 2423               | 145.5 (17.0)                                 | 145.2 (16.9) | 145.4 (16.5) | 145.4 (16.5) | 144.7 (16.6) | 0.58     |
| <145                             | 763                | 135.3 (13.2)                                 | 135.1 (13.1) | 135.5 (13.4) | 135.8 (13.2) | 135.1 (13.1) | 0.56     |
| 145–154                          | 699                | 143.8 (13.8)                                 | 143.1 (13.3) | 143.3 (13.0) | 142.9 (13.3) | 141.9 (12.9) | 0.035    |
| 155–164                          | 544                | 150.2 (15.3)                                 | 150.5 (15.4) | 150.5 (14.6) | 151.2 (14.4) | 150.5 (14.7) | 0.67     |
| ≥165                             | 417                | 161.1 (16.5)                                 | 160.0 (17.0) | 160.3 (15.4) | 160.1 (16.1) | 160.5 (15.9) | 0.65     |

Values are expressed as the arithmetic mean (standard deviation). The numbers of patients with missing blood pressure data on the fourth and fifth days were 38 and 84 at pretreatment and 87 and 286 during monotherapy, respectively, while *P* values were calculated by a repeated measure mixed linear model to take missing values into account and represent the differences among the five systolic home blood pressure values according to the measurement day at baseline during pretreatment.

Differences between the adjacent days were not significant during pretreatment ( $P \geq 0.12$ ) or monotherapy ( $P \geq 0.14$ ).

1  
2  
3  
4  
5  
6  
7  
8  
9  
10  
11  
12  
13  
14  
15  
16  
17  
18  
19  
20  
21  
22  
23  
24  
25  
26  
27  
28  
29  
30  
31  
32  
33  
34  
35  
36  
37  
38  
39  
40  
41  
42  
43  
44  
45  
46  
47  
48  
49  
50  
51  
52  
53  
54  
55  
56  
57  
58  
59  
60



Figure 1: Time course of blood pressure measurement during the study period. Home blood pressures were the average of 5 days before randomisation without any antihypertensive treatment, after 10 to 28 days of monotherapy initiation, and at the end of follow-up period. Patients with 3 to 4 days of home blood pressure data in each interval were also included. ACEI, angiotensin-converting enzyme inhibitor; ARB, angiotensin receptor blocker; CCB, calcium channel blocker.

193x74mm (600 x 600 DPI)



Figure 2. Reduction in the systolic home blood pressure during monotherapy categorized by pretreatment home (left panel) and office (right panel) blood pressure. Error bars indicate 95% confidence interval. Data were adjusted for sex, age, body mass index, diabetes mellitus, current smoking and drinking, hypercholesterolemia, history of cardiovascular disease, and defined daily dose during monotherapy.

236x144mm (600 x 600 DPI)

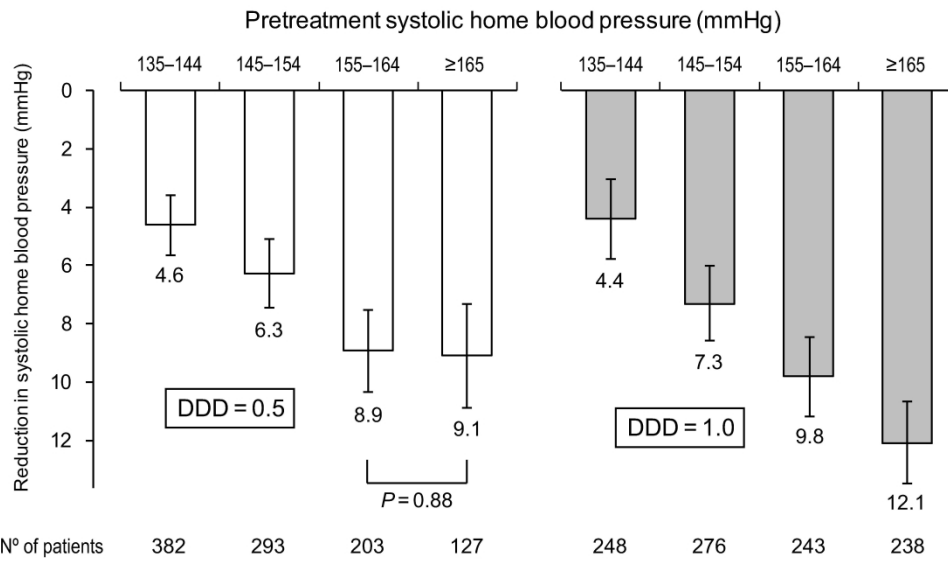

Figure 3. Reduction in the systolic home blood pressure during monotherapy categorized by pretreatment home blood pressure, stratified by defined daily dose (0.5 unit, left panel; 1 unit, right panel). Error bars indicate 95% confidence interval. Data were adjusted for sex, age, body mass index, diabetes mellitus, current smoking and drinking, hypercholesterolemia, and history of cardiovascular disease.

206x119mm (600 x 600 DPI)

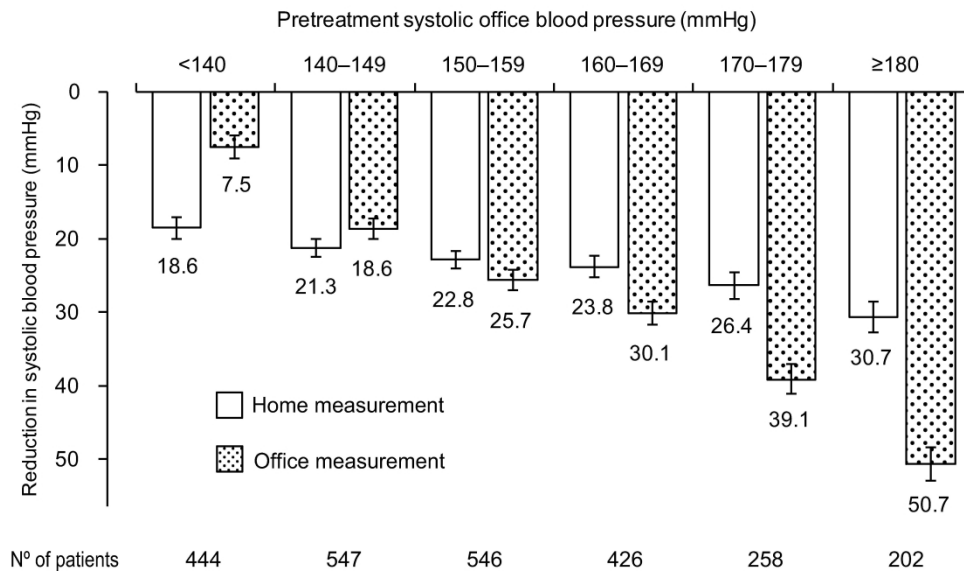

Figure 4. Reduction in the follow-up systolic blood pressure categorized by pretreatment office blood pressure.

Error bars indicate 95% confidence interval. Adjusted for sex, age, body mass index, diabetes mellitus, current smoking and drinking, hypercholesterolemia, history of cardiovascular disease, and defined daily dose at the end of follow-up period (mean, 7.0 years).

196x115mm (600 x 600 DPI)



DXII (17/11/20 15:37)  
Hihom12\_spl  
BMJ Open



## SUPPLEMENTARY INFORMATION

### **Antihypertensive drug effects according to the pretreatment self-measured home blood pressure: the HOMED-BP study**

Short title: Wilder's Law on Home Blood Pressure

Hikari Sano, Azusa Hara, Kei Asayama, Seiko Miyazaki,  
Masahiro Kikuya, Yutaka Imai, Takayoshi Ohkubo,  
on behalf of

Hypertension Objective Treatment Based on Measurement  
by Electrical Devices of Blood Pressure (HOMED-BP) investigators

This appendix function as part of the original submission and has been peer-reviewed.

We have posted it as supplied by the authors.

**Supplemental Table 1: Baseline characteristics of the analysed patients ( $n=2,423$ ), all excluded patients ( $n=1,095$ ), and patients excluded due to an insufficient number of home blood pressure measurements ( $n=694$ ).**

| Characteristics                     | Analysed     | Excluded     |          |                           |          |
|-------------------------------------|--------------|--------------|----------|---------------------------|----------|
|                                     |              | Any Reason   | <i>P</i> | Insufficient Home Reading | <i>P</i> |
| Number of participants              | 2423         | 1095         |          | 694                       |          |
| Women, n                            | 1235 (51.0)  | 528 (48.2)   | 0.13     | 355 (51.2)                | 0.93     |
| Age, years                          | 60.0 (9.8)   | 58.6 (10.5)  | <0.0001  | 59.1 (10.7)               | 0.030    |
| Body mass index, kg/m <sup>2</sup>  | 24.4 (3.3)   | 24.4 (3.6)   | >0.99    | 24.4 (3.6)                | 0.97     |
| Smoking, n                          | 501 (20.7)   | 242 (22.1)   | 0.34     | 149 (21.5)                | 0.65     |
| Drinking, n                         | 1172 (48.4)  | 499 (45.6)   | 0.12     | 299 (43.1)                | 0.014    |
| Diabetes mellitus, n                | 378 (15.6)   | 160 (14.6)   | 0.45     | 105 (15.1)                | 0.76     |
| Hypercholesterolemia, n             | 1261 (52.0)  | 542 (49.5)   | 0.16     | 347 (50.0)                | 0.34     |
| Previous cardiovascular diseases, n | 66 (2.7)     | 40 (3.7)     | 0.14     | 31 (4.5)                  | 0.020    |
| Home blood pressure                 |              |              |          |                           |          |
| Systolic, mmHg                      | 152.5 (11.6) | 149.7 (14.1) | <0.0001  | 152.6 (13.0)              | 0.83     |
| Diastolic, mmHg                     | 89.8 (10.3)  | 90.2 (9.5)   | 0.26     | 90.5 (9.8)                | 0.12     |
| Office blood pressure               |              |              |          |                           |          |
| Systolic, mmHg                      | 154.7 (17.4) | 153.0 (17.7) | 0.0064   | 154.2 (17.2)              | 0.49     |
| Diastolic, mmHg                     | 90.1 (12.2)  | 90.3 (12.2)  | 0.71     | 90.0 (12.3)               | 0.85     |

Values are expressed as the arithmetic mean (standard deviation) or number (%). *P* values were calculated by the t-test or the chi-squared test, with comparisons made between the 2,423 analysed patients and each excluded group.



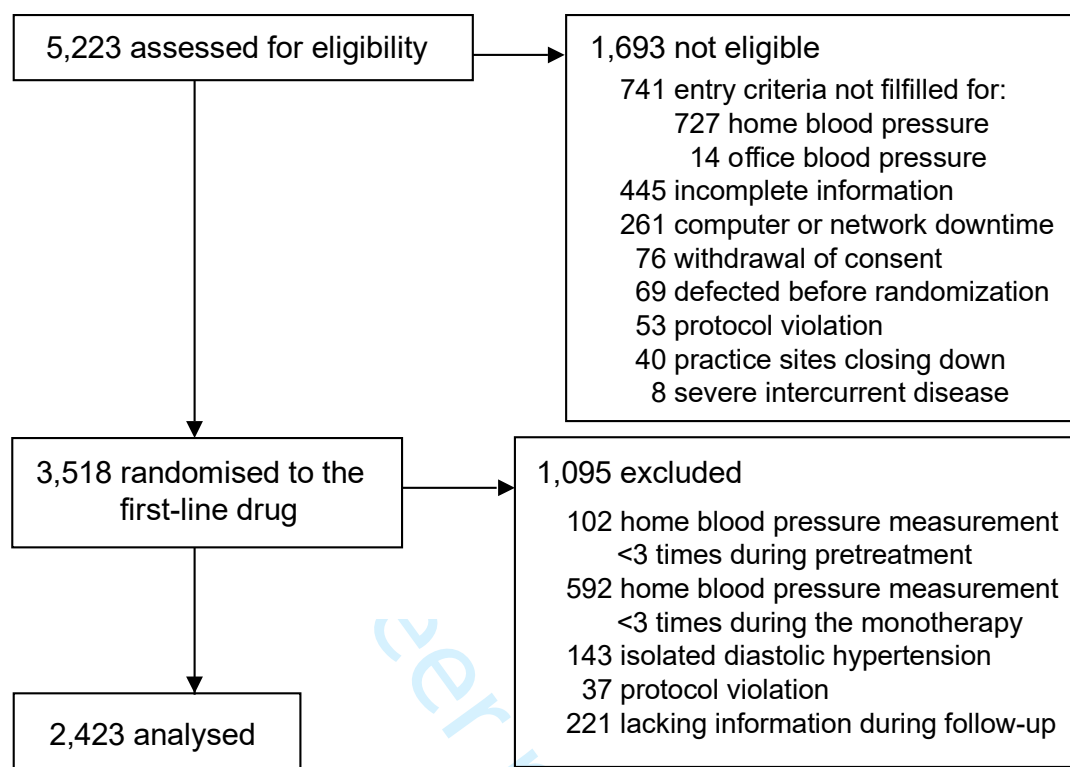

**Supplemental Figure 1: Flowchart of the study.**

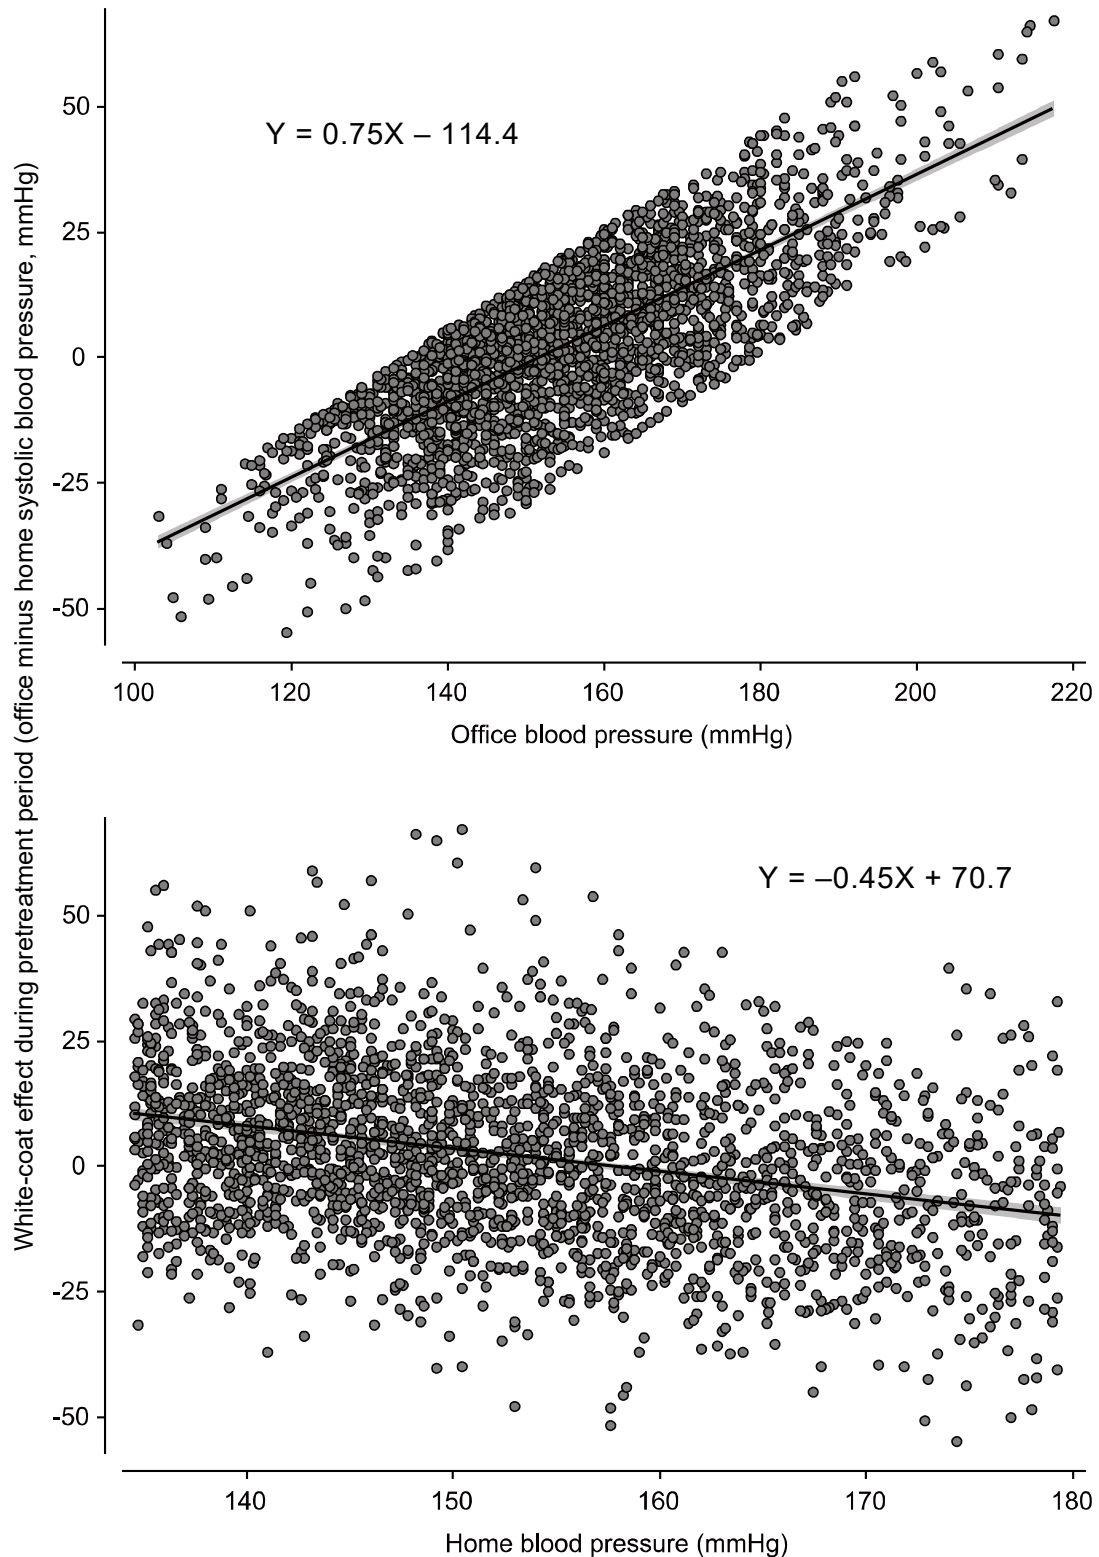

**Supplemental Figure 2: Relationship between the white-coat effect and office systolic blood pressure (A) as well as home blood pressure (B) during pretreatment period.**

The white-coat effect was defined as the office blood pressure minus the home blood pressure as a continuous variable. Regression line with 95% confidence limits were overlay on each scatter plot. Because systolic home blood pressure ranged 135–179 mmHg in this population, plots in panel A demonstrate as a band-like distribution which rises to the right.

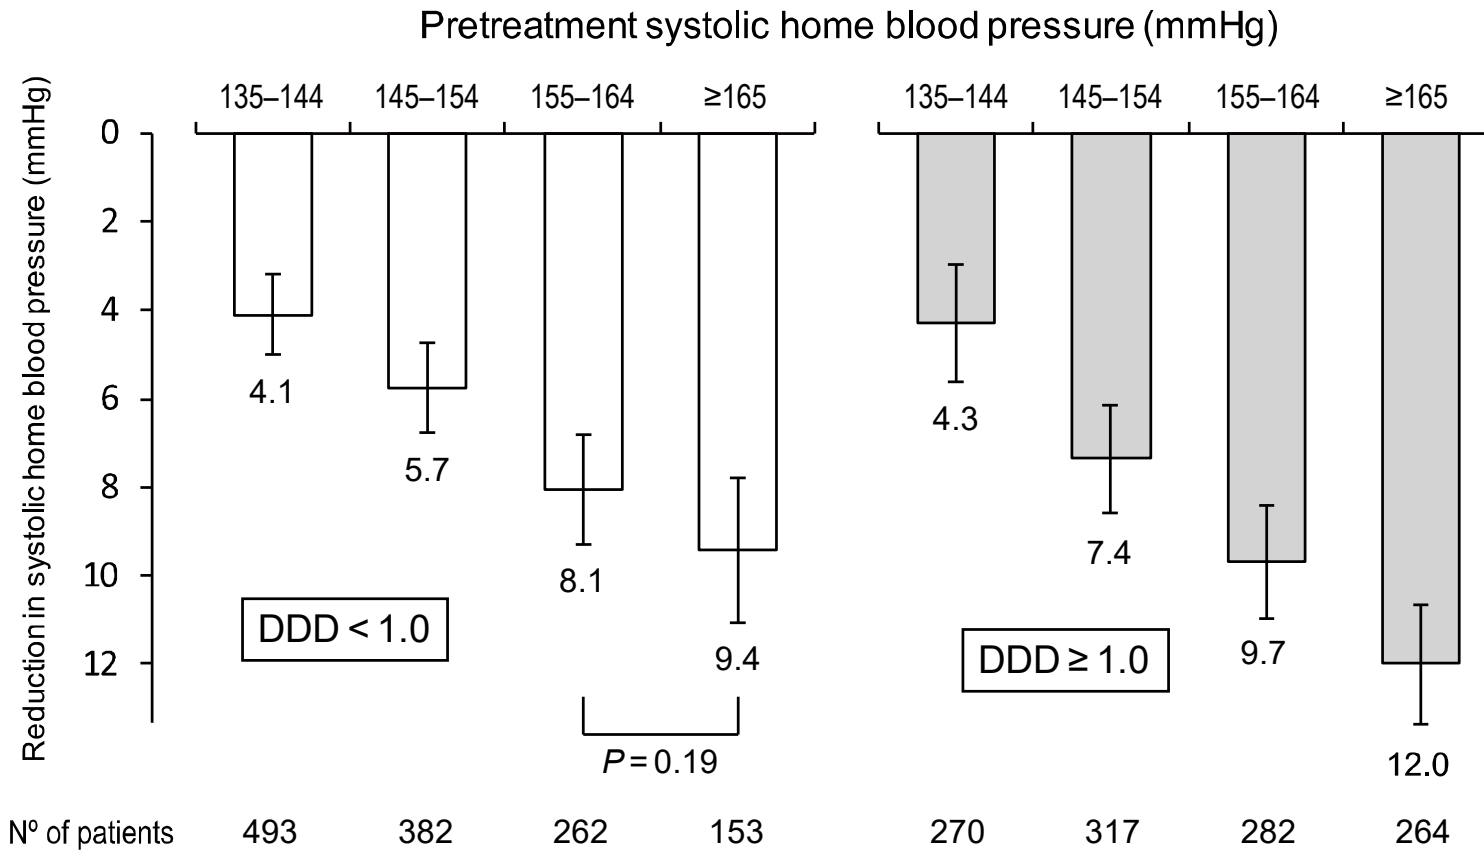

**Supplemental Figure 3: Reduction in the systolic home blood pressure during monotherapy categorized by pretreatment home blood pressure and stratified by defined daily dose (<1 unit, left panel; ≥1 unit, right panel).**

Error bars indicate 95% confidence interval. Data were adjusted for sex, age, body mass index, diabetes mellitus, current smoking and drinking, hypercholesterolemia, history of cardiovascular disease, and defined daily dose during monotherapy.

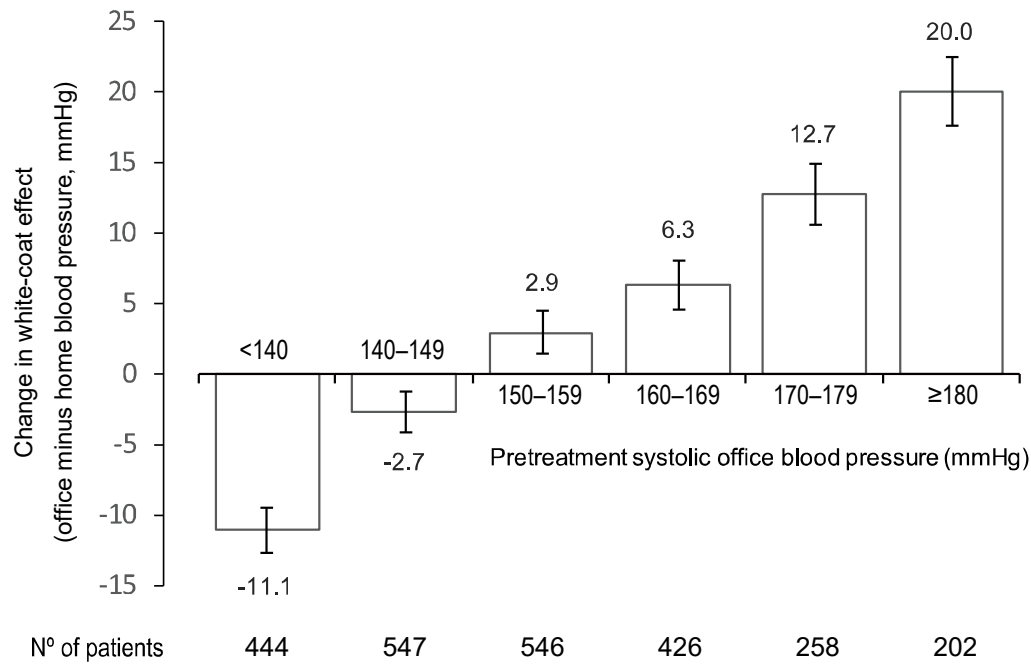

**Supplemental Figure 4: Changes in the white-coat effect during follow-up categorized by the pretreatment office blood pressure.**

Error bars indicate 95% confidence interval. The white-coat effect was defined as the office blood pressure minus the home blood pressure, and changes in the white-coat effect were determined by subtracting the effect observed at the end of follow-up period from the effect during pretreatment.
