# Supplementary material for: Antihypertensive drug effects according to the pretreatment self-measured home blood pressure: the HOMED-BP study
Source: PubMed Central journal article supplement — BMJ Open. 2020 Dec 12;10(12):e040524. doi: 10.1136/bmjopen-2020-040524 (PMC7735093; doi:10.1136/bmjopen-2020-040524), 2020-12-12
Supplement: bmjopen-2020-040524supp001.pdf [file bmjopen-2020-040524supp001.pdf]

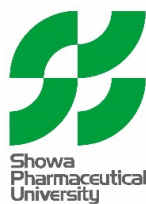

DXII (17/11/20 15:37)  
Hihom12\_spl  
BMJ Open

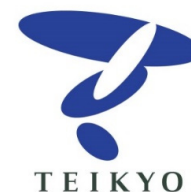

## SUPPLEMENTARY INFORMATION

### **Antihypertensive drug effects according to the pretreatment self-measured home blood pressure: the HOMED-BP study**

Short title: Wilder's Law on Home Blood Pressure

Hikari Sano, Azusa Hara, Kei Asayama, Seiko Miyazaki,

Masahiro Kikuya, Yutaka Imai, Takayoshi Ohkubo,

on behalf of

Hypertension Objective Treatment Based on Measurement

by Electrical Devices of Blood Pressure (HOMED-BP) investigators

This appendix function as part of the original submission and has been peer-reviewed.

We have posted it as supplied by the authors.

**Supplemental Table 1: Baseline characteristics of the analysed patients ( $n=2,423$ ), all excluded patients ( $n=1,095$ ), and patients excluded due to an insufficient number of home blood pressure measurements ( $n=694$ ).**

| Characteristics                     | Analysed     | Excluded     |         | P | Insufficient Home Reading | P     |
|-------------------------------------|--------------|--------------|---------|---|---------------------------|-------|
|                                     |              | Any Reason   |         |   |                           |       |
| Number of participants              | 2423         | 1095         |         |   | 694                       |       |
| Women, n                            | 1235 (51.0)  | 528 (48.2)   | 0.13    |   | 355 (51.2)                | 0.93  |
| Age, years                          | 60.0 (9.8)   | 58.6 (10.5)  | <0.0001 |   | 59.1 (10.7)               | 0.030 |
| Body mass index, kg/m <sup>2</sup>  | 24.4 (3.3)   | 24.4 (3.6)   | >0.99   |   | 24.4 (3.6)                | 0.97  |
| Smoking, n                          | 501 (20.7)   | 242 (22.1)   | 0.34    |   | 149 (21.5)                | 0.65  |
| Drinking, n                         | 1172 (48.4)  | 499 (45.6)   | 0.12    |   | 299 (43.1)                | 0.014 |
| Diabetes mellitus, n                | 378 (15.6)   | 160 (14.6)   | 0.45    |   | 105 (15.1)                | 0.76  |
| Hypercholesterolemia, n             | 1261 (52.0)  | 542 (49.5)   | 0.16    |   | 347 (50.0)                | 0.34  |
| Previous cardiovascular diseases, n | 66 (2.7)     | 40 (3.7)     | 0.14    |   | 31 (4.5)                  | 0.020 |
| Home blood pressure                 |              |              |         |   |                           |       |
| Systolic, mmHg                      | 152.5 (11.6) | 149.7 (14.1) | <0.0001 |   | 152.6 (13.0)              | 0.83  |
| Diastolic, mmHg                     | 89.8 (10.3)  | 90.2 (9.5)   | 0.26    |   | 90.5 (9.8)                | 0.12  |
| Office blood pressure               |              |              |         |   |                           |       |
| Systolic, mmHg                      | 154.7 (17.4) | 153.0 (17.7) | 0.0064  |   | 154.2 (17.2)              | 0.49  |
| Diastolic, mmHg                     | 90.1 (12.2)  | 90.3 (12.2)  | 0.71    |   | 90.0 (12.3)               | 0.85  |

Values are expressed as the arithmetic mean (standard deviation) or number (%). *P* values were calculated by the t-test or the chi-squared test, with comparisons made between the 2,423 analysed patients and each excluded group.

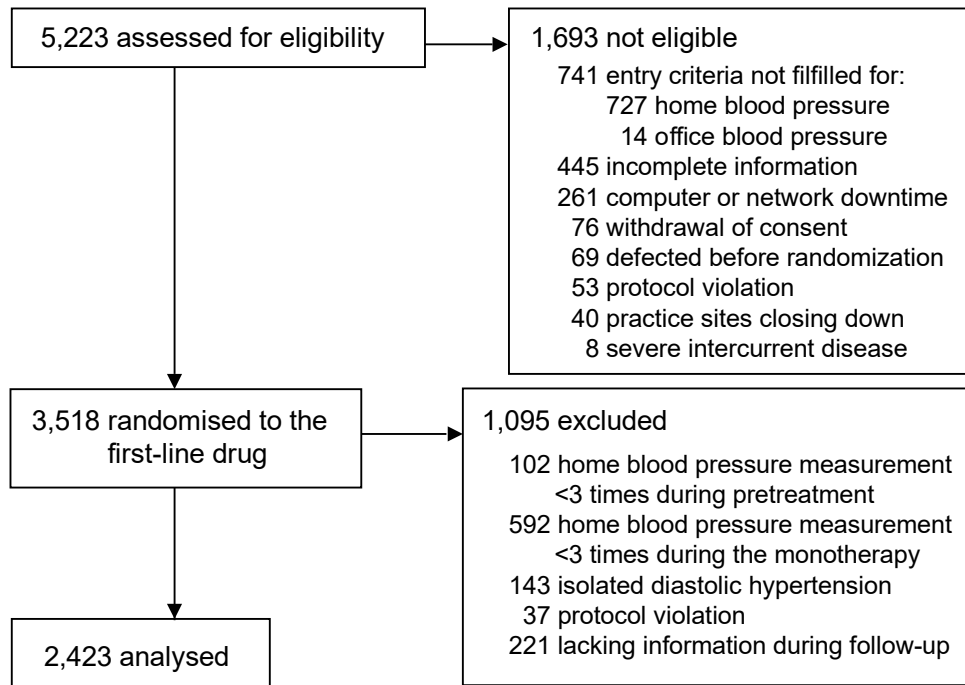

**Supplemental Figure 1: Flowchart of the study.**

## Wilder's Law on Home Blood Pressure -4-

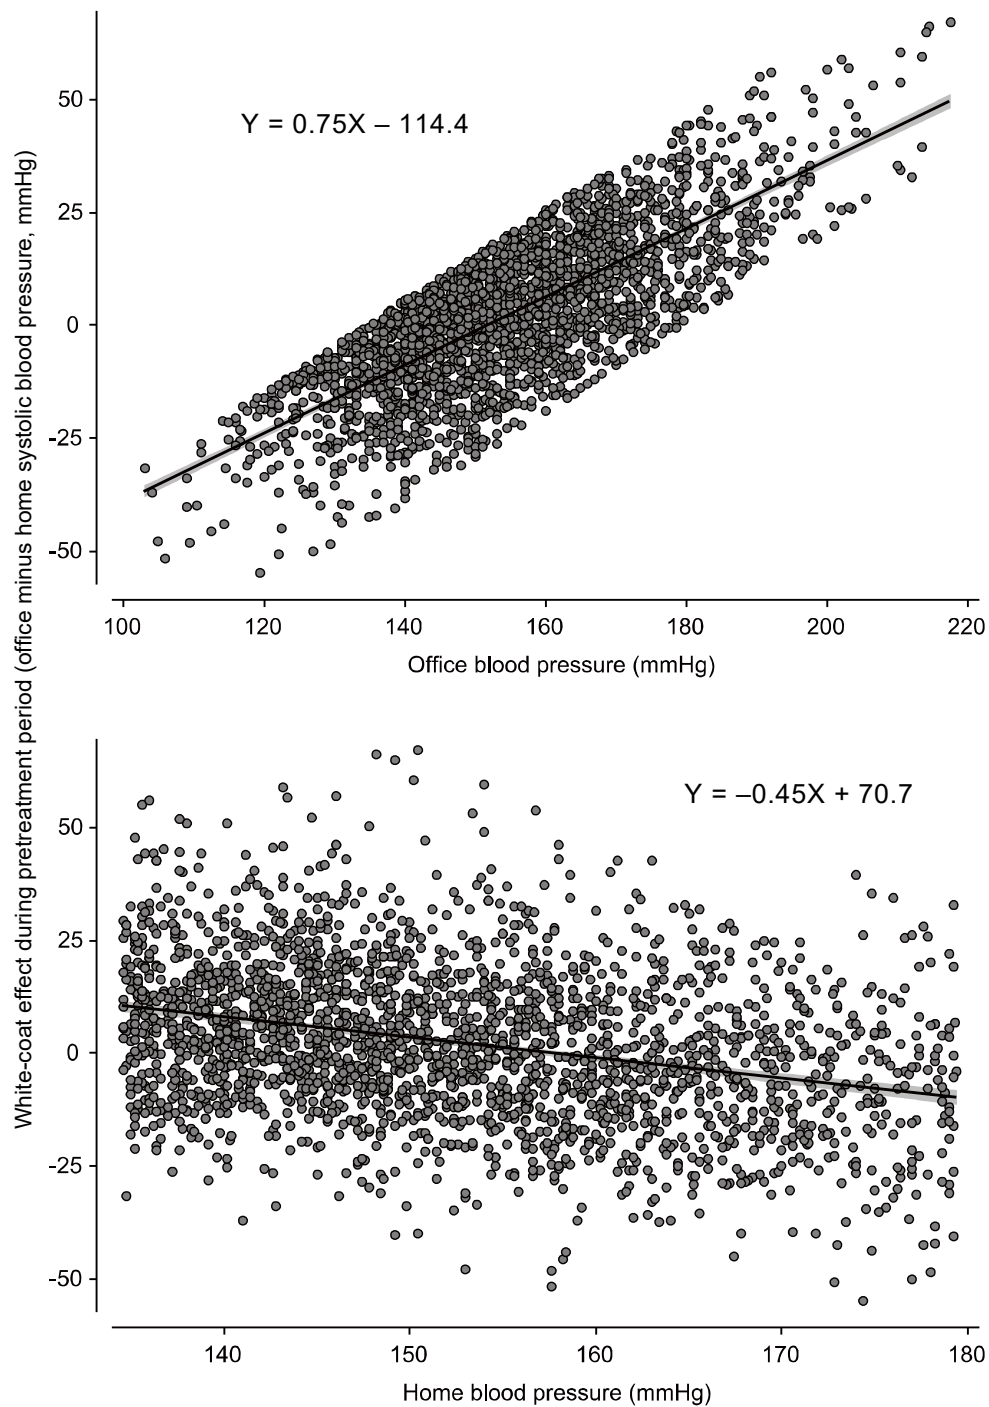**Supplemental Figure 2: Relationship between the white-coat effect and office systolic blood pressure (A) as well as home blood pressure (B) during pretreatment period.**

The white-coat effect was defined as the office blood pressure minus the home blood pressure as a continuous variable. Regression line with 95% confidence limits were overlay on each scatter plot. Because systolic home blood pressure ranged 135–179 mmHg in this population, plots in panel A demonstrate as a band-like distribution which rises to the right.

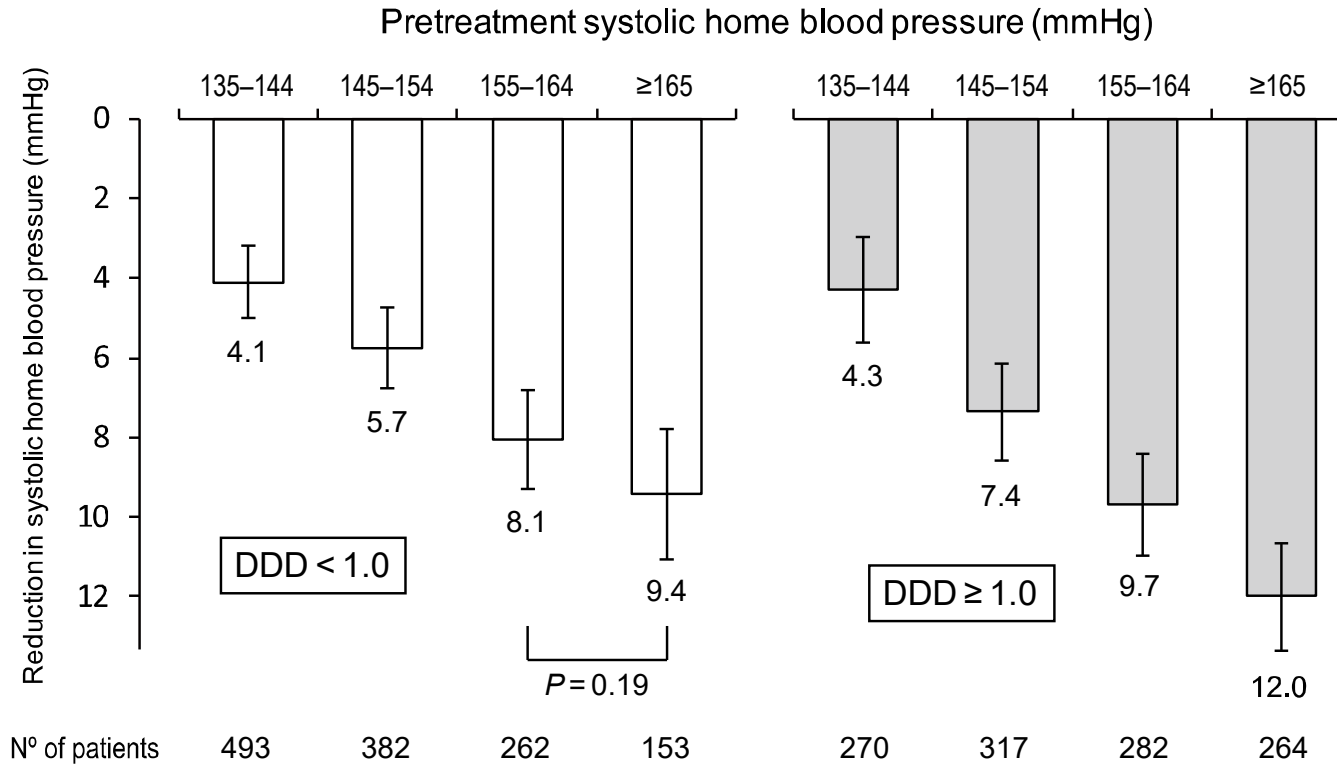

**Supplemental Figure 3: Reduction in the systolic home blood pressure during monotherapy categorized by pretreatment home blood pressure and stratified by defined daily dose (<1 unit, left panel; ≥1 unit, right panel).**

Error bars indicate 95% confidence interval. Data were adjusted for sex, age, body mass index, diabetes mellitus, current smoking and drinking, hypercholesterolemia, history of cardiovascular disease, and defined daily dose during monotherapy.

## Wilder's Law on Home Blood Pressure -6-

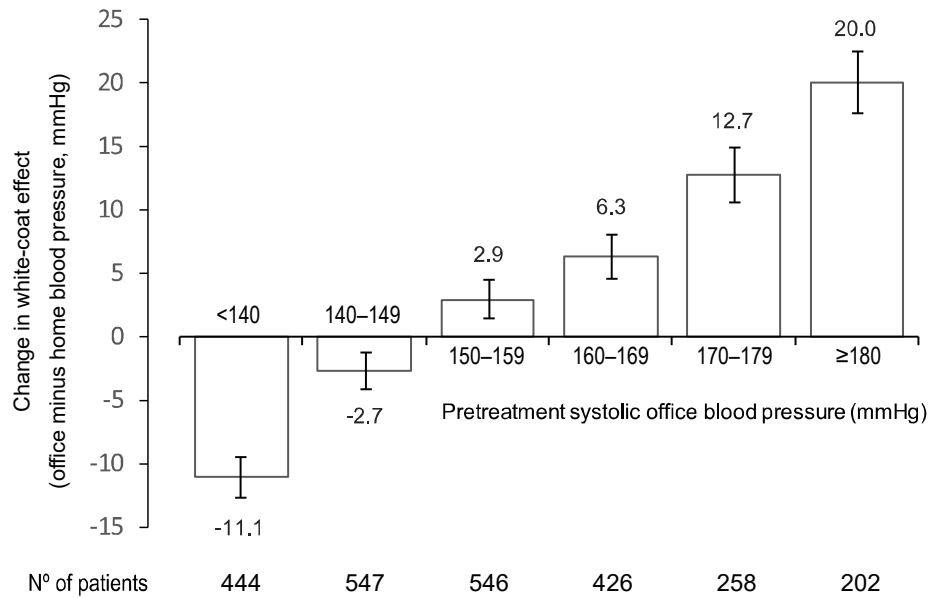**Supplemental Figure 4: Changes in the white-coat effect during follow-up categorized by the pretreatment office blood pressure.**

Error bars indicate 95% confidence interval. The white-coat effect was defined as the office blood pressure minus the home blood pressure, and changes in the white-coat effect were determined by subtracting the effect observed at the end of follow-up period from the effect during pretreatment.
